# Supplementary material for: Experimental exposure to urban and pink noise affects brain development and song learning in zebra finches (Taenopygia guttata)
Source: PeerJ. 2016 Aug 16;4:e2287. doi: 10.7717/peerj.2287 (PMC4991897; doi:10.7717/peerj.2287)
Supplement: Data S1 — All raw song, physiological and brain measurement data used in the study. Separate sheets correspond to different datasets used in the study. Includes Group 1 song measurement data from RavenPro at PHD 40 and PHD 100, song comparison data within individuals PHD 60–100 and between tutors and tutees (for both groups), baseline corticosterone data for group 1, and brain measurement data for group 1. [file peerj-04-2287-s001.xlsx]

## Sheet: Group 1 Day 40 Data
Individual	Selection	View	Channel	Begin Time (s)	End Time (s)	Low Freq (Hz)	High Freq (Hz)	# fully formed syllables	# total syllables
3236	1	Spectrogram 1	1	360.572	367.071	336.5	11161	0	29
3236	2	Spectrogram 1	1	369.545	372.017	280.4	10936.6	1	11
3236	3	Spectrogram 1	1	374.093	376.331	112.2	9534.5	0	8
3236	4	Spectrogram 1	1	381.643	386.066	392.6	10151.4	0	16
3236	5	Spectrogram 1	1	390.046	391.871	448.7	11048.8	0	12
3236	6	Spectrogram 1	1	392.923	395.366	336.5	10992.7	0	10
3236	7	Spectrogram 1	1	439.345	440.627	280.4	7851.9	0	5
3236	8	Spectrogram 1	1	451.945	456.2	392.6	10712.3	0	17
3236	9	Spectrogram 1	1	482.331	489.18	280.4	9814.9	0	32
3236	10	Spectrogram 1	1	496.724	498.72	280.4	9590.6	0	11
3237	1	Spectrogram 1	1	457.044	457.911	334.6	10171.4	0	5
3237	2	Spectrogram 1	1	450.574	452.023	200.8	11041.3	0	8
3237	1	Spectrogram 1	1	589.375	591.699	401.5	14052.6	0	10
3237	1	Spectrogram 1	1	20.789	22.428	369.5	11749.2	0	9
3237	2	Spectrogram 1	1	27.077	29.03	443.4	10123.5	0	7
3237	3	Spectrogram 1	1	34.05	35.938	443.4	10493	0	9
3237	4	Spectrogram 1	1	40.623	45.708	369.5	10566.9	1	16
3237	5	Spectrogram 1	1	50.431	52.597	517.3	11379.7	0	12
3237	6	Spectrogram 1	1	53.807	56.564	443.4	10862.5	0	12
3237	7	Spectrogram 1	1	59.316	60.823	443.4	9975.7	0	7
3238	1	Spectrogram 1	1	206.497	207.71	249.5	14344.4	0	10
3238	2	Spectrogram 1	1	208.278	209.193	311.8	14406.7	0	9
3238	3	Spectrogram 1	1	209.915	211.533	436.6	10664.7	0	12
3238	4	Spectrogram 1	1	217.205	218.125	436.6	11974.4	0	7
3238	5	Spectrogram 1	1	240.331	241.089	436.6	15529.3	0	7
3238	6	Spectrogram 1	1	242.374	243.83	374.2	15155.1	0	13
3238	7	Spectrogram 1	1	244.34	245.566	374.2	15217.5	0	10
3238	8	Spectrogram 1	1	253.249	255.58	311.8	15529.3	0	19
3238	9	Spectrogram 1	1	256.027	258.25	249.5	15030.4	0	10
3238	10	Spectrogram 1	1	259.075	263.047	311.8	14905.7	0	20
3241	1	Spectrogram 1	1	286.142	302.846	392.6	14918.7	0	84
3241	2	Spectrogram 1	1	305.431	309.855	336.5	15030.9	0	28
3241	1	Spectrogram 1	1	32.178	33.1	635.2	11607.2	4	5
3241	2	Spectrogram 1	1	33.811	35.222	404.2	12126.9	5	6
3241	3	Spectrogram 1	1	35.634	36.547	693	10105.7	3	5
3241	4	Spectrogram 1	1	51.699	52.578	519.7	9990.2	2	6
3241	5	Spectrogram 1	1	53.461	54.085	288.7	11318.4	3	4
3241	6	Spectrogram 1	1	55.851	57.571	404.2	11433.9	7	8
3241	7	Spectrogram 1	1	60.251	61.017	519.7	10048	2	5
3241	8	Spectrogram 1	1	67.331	69.362	288.7	12819.8	6	11
3242	1	Spectrogram 1	1	462.731	463.798	535.6	11009.4	0	5
3242	2	Spectrogram 1	1	465.478	466.264	714.1	9164.6	0	4
3242	3	Spectrogram 1	1	471.804	474.624	357.1	11485.5	0	8
3242	1	Spectrogram 1	1	5.134	6.328	535.6	8926.5	0	8
3242	2	Spectrogram 1	1	10.955	13.185	535.6	9640.7	0	17
3242	3	Spectrogram 1	1	15.637	16.732	714.1	11187.9	0	7
3242	4	Spectrogram 1	1	22.799	24.261	833.1	9462.1	0	6
3242	5	Spectrogram 1	1	27.381	28.602	773.6	8629	0	8
3242	6	Spectrogram 1	1	35.06	36.427	654.6	9045.6	0	7
3242	7	Spectrogram 1	1	41.746	44.396	654.6	10176.3	0	12
3245	1	Spectrogram 1	1	564.642	566.845	571.1	11593.8	0	14
3245	1	Spectrogram 1	1	408.122	410.145	341.4	12462	0	14
3245	2	Spectrogram 1	1	493.346	495.402	512.1	9161.5	0	12
3245	1	Spectrogram 1	1	348.924	350.264	460.3	9665.7	0	9
3245	2	Spectrogram 1	1	357.617	358.963	460.3	7824.6	0	7
3245	3	Spectrogram 1	1	364.851	366.284	575.3	9550.6	0	9
3245	4	Spectrogram 1	1	368.762	370.283	632.9	9550.6	0	8
3245	5	Spectrogram 1	1	373.738	375.208	517.8	10126	0	8
3245	6	Spectrogram 1	1	405.265	406.854	460.3	9493.1	0	6
3245	1	Spectrogram 1	1	507.795	509.299	402.7	10298.6	0	7
3245	1	Spectrogram 1	1	16.848	18.963	460.3	14153.4	0	11
3245	2	Spectrogram 1	1	44.362	47.56	402.7	10528.7	0	15
3245	3	Spectrogram 1	1	91.066	92.746	345.2	14268.4	0	8
3245	4	Spectrogram 1	1	93.426	94.717	460.3	12542.4	0	7
3246	1	Spectrogram 1	1	373.52	374.793	272.3	15523.6	0	6
3246	2	Spectrogram 1	1	398.35	399.805	204.3	13276.8	0	10
3246	3	Spectrogram 1	1	404.19	404.699	408.5	10008.6	0	4
3246	4	Spectrogram 1	1	405.852	406.812	408.5	14434.2	0	9
3246	5	Spectrogram 1	1	413.526	414.424	408.5	14502.3	0	7
3246	6	Spectrogram 1	1	428.054	429.293	340.4	14978.9	0	6
3246	7	Spectrogram 1	1	440.45	441.967	340.4	14706.6	0	7
3246	8	Spectrogram 1	1	442.914	443.989	272.3	14502.3	0	5
3246	9	Spectrogram 1	1	449.534	452.341	408.5	14638.5	0	9
3246	10	Spectrogram 1	1	582.544	584.311	340.4	13344.9	0	13
3248	1	Spectrogram 1	1	558.131	559.652	560.9	11329.2	0	7
3248	2	Spectrogram 1	1	564.222	566.751	673	8805.4	0	13
3248	3	Spectrogram 1	1	572.372	574.556	504.8	7627.6	0	11
3248	4	Spectrogram 1	1	575.109	576.38	560.9	8300.6	0	7
3248	5	Spectrogram 1	1	594.141	596.707	392.6	7964.1	0	12
3248	1	Spectrogram 1	1	1.894	3.601	607.5	9719.5	0	10
3248	2	Spectrogram 1	1	14.029	18.23	540	9652	0	19
3248	3	Spectrogram 1	1	33.946	36.541	540	8909.5	0	14
3248	4	Spectrogram 1	1	52.507	54.872	472.5	8234.6	0	9
3248	5	Spectrogram 1	1	58.993	61.157	472.5	8167.1	0	10
3249	1	Spectrogram 1	1	441.14	442.295	288.7	10538.8	0	8
3249	2	Spectrogram 1	1	467.115	468.65	433.1	11621.6	0	7
3249	3	Spectrogram 1	1	473.072	475.724	360.9	11477.2	0	14
3249	6	Spectrogram 1	1	481.383	483.545	433.1	9600.4	0	12
3249	7	Spectrogram 1	1	484.088	485.37	360.9	8589.9	0	7
3249	8	Spectrogram 1	1	491.083	491.993	288.7	8084.6	0	6
3249	9	Spectrogram 1	1	503.175	505.689	288.7	8662.1	0	12
3249	10	Spectrogram 1	1	510.928	512.635	360.9	10105.7	0	10
3249	11	Spectrogram 1	1	521.499	529.482	288.7	10177.9	0	34
3249	12	Spectrogram 1	1	532.079	535.777	433.1	12560	0	18
3251	1	Spectrogram 1	1	160.594	164.657	483.5	10213.2	0	16
3251	2	Spectrogram 1	1	180.528	184.571	483.5	9488	0	19
3251	3	Spectrogram 1	1	185.436	187.327	302.2	9669.3	0	10
3251	4	Spectrogram 1	1	196.481	197.654	120.9	9850.6	0	6
3251	5	Spectrogram 1	1	199.499	203.596	483.5	9790.1	0	16
3251	6	Spectrogram 1	1	295.557	297.687	362.6	10152.7	0	10
3251	1	Spectrogram 1	1	83.318	85.664	560.9	7122.8	0	10
3251	2	Spectrogram 1	1	94.024	98.238	560.9	10207.5	0	18
3251	3	Spectrogram 1	1	104.394	107.505	448.7	10487.9	0	14
3251	4	Spectrogram 1	1	112.473	116.121	673	10375.8	0	17
3254	1	Spectrogram 1	1	321.293	324.076	454.8	11369	0	14
3254	2	Spectrogram 1	1	326.466	329.331	454.8	12278.5	0	15
3254	3	Spectrogram 1	1	330.284	332.009	324.8	10004.7	0	11
3254	4	Spectrogram 1	1	332.57	337.991	454.8	10524.4	0	27
3254	5	Spectrogram 1	1	346.632	350.812	519.7	9809.8	0	20
3254	1	Spectrogram 1	1	137.412	138.47	548.1	8709.4	0	5
3254	2	Spectrogram 1	1	190.541	191.195	487.2	10780.2	0	5
3254	3	Spectrogram 1	1	213.953	216.128	304.5	10962.9	0	11
3254	4	Spectrogram 1	1	217.428	219.442	243.6	11693.8	0	12
3256	1	Spectrogram 1	1	404.486	409.133	365.4	11145.6	0	18
3256	2	Spectrogram 1	1	422.409	425.315	365.4	10780.2	0	13
3256	3	Spectrogram 1	1	427.399	429.712	365.4	11267.4	0	12
3256	1	Spectrogram 1	1	584.883	586.931	226	11863.3	0	15
3256	2	Spectrogram 1	1	594.155	596.164	621.4	10676.9	0	13
3256	1	Spectrogram 1	1	0.694	2.527	451.9	11015.9	0	11
3256	2	Spectrogram 1	1	8.254	10.786	339	10507.5	0	15
3256	3	Spectrogram 1	1	12.951	17.371	169.5	12202.2	0	28
3256	4	Spectrogram 1	1	32.832	37.765	395.4	12371.7	0	20
3256	5	Spectrogram 1	1	38.914	42.308	621.4	11806.8	0	19
3261	1	Spectrogram 1	1	16.019	18.795	517.8	11334.2	0	15
3261	2	Spectrogram 1	1	20.468	23.37	287.7	10701.3	0	17
3261	3	Spectrogram 1	1	58.635	62.185	345.2	11679.4	0	26
3261	5	Spectrogram 1	1	62.559	63.459	402.7	11391.7	0	5
3261	6	Spectrogram 1	1	64.09	68.379	345.2	15304	0	31
3261	7	Spectrogram 1	1	72.363	74.517	402.7	12945.1	0	13
3261	8	Spectrogram 1	1	151.422	152.989	230.1	12945.1	0	9
3261	9	Spectrogram 1	1	177.787	180.571	402.7	14268.4	0	20
3261	10	Spectrogram 1	1	192.306	193.943	517.8	10816.4	0	14
3261	11	Spectrogram 1	1	200.519	202.01	575.3	12484.9	0	11
3262	1	Spectrogram 1	1	221.986	223.688	391.2	11065.1	0	9
3262	2	Spectrogram 1	1	225.081	227.315	391.2	11232.7	0	13
3262	3	Spectrogram 1	1	231.978	234.73	279.4	10897.4	0	17
3262	4	Spectrogram 1	1	248.236	249.999	391.2	11512.2	0	11
3262	5	Spectrogram 1	1	250.648	253.086	391.2	11735.7	0	14
3262	6	Spectrogram 1	1	257.519	260.854	503	12182.8	0	20
3262	7	Spectrogram 1	1	268.722	271.73	447.1	11009.2	0	16
3262	8	Spectrogram 1	1	275.05	278.625	558.8	11623.9	0	17
3262	9	Spectrogram 1	1	290.479	292.077	503	11121	0	10
3262	10	Spectrogram 1	1	315.606	317.269	447.1	10450.4	0	9
3263	1	Spectrogram 1	1	547.18	548.612	354.4	13997.1	0	8
3367	1	Spectrogram 1	1	379.043	381.478	542.3	11863.3	0	14
3367	2	Spectrogram 1	1	391.638	396.137	474.5	9965.1	0	22
3367	3	Spectrogram 1	1	400.771	402.1	745.7	10236.3	0	8
3367	4	Spectrogram 1	1	416.685	419.859	406.7	9626.2	2	16
3367	5	Spectrogram 1	1	452.2	459.636	271.2	12880.1	3	35
3367	6	Spectrogram 1	1	460.366	462.606	610.1	10982	0	10
3367	7	Spectrogram 1	1	478.404	480.797	677.9	10914.2	0	14
3367	8	Spectrogram 1	1	488.68	492.505	406.7	11456.5	0	18
3367	9	Spectrogram 1	1	494.366	499.688	406.7	10982	0	25
3367	10	Spectrogram 1	1	501.336	505.026	610.1	10710.8	0	18
3368	1	Spectrogram 1	1	336.453	337.592	336.5	13124	0	8
3368	2	Spectrogram 1	1	342.451	343.701	280.4	9814.9	0	10
3368	3	Spectrogram 1	1	502.736	504.715	392.6	15143	0	14
3368	4	Spectrogram 1	1	563.011	564.465	336.5	14301.7	0	8
3368	1	Spectrogram 1	1	0.235	3.045	280.4	13348.3	0	19
3368	2	Spectrogram 1	1	4.014	5.661	224.3	13011.8	0	10
3368	3	Spectrogram 1	1	12.619	15.493	280.4	13853.1	0	20
3368	4	Spectrogram 1	1	23.457	25.242	336.5	15143	0	13
3368	5	Spectrogram 1	1	31.35	33.866	392.6	14694.3	0	19
3368	6	Spectrogram 1	1	46.493	49.575	392.6	12731.4	0	17
3375	1	Spectrogram 1	1	502.696	508.472	371.2	10394.5	0	28
3375	3	Spectrogram 1	1	510.407	511.521	618.7	12312.5	0	6
3375	4	Spectrogram 1	1	518.197	520.494	309.4	10765.7	0	13
3375	1	Spectrogram 1	1	208.573	209.886	564.9	11241.8	0	8
3375	2	Spectrogram 1	1	468.419	470.968	564.9	9773.1	0	9
3375	3	Spectrogram 1	1	474.461	477.636	790.9	10168.5	0	12
3375	4	Spectrogram 1	1	498.664	499.774	847.4	10676.9	0	5
3375	1	Spectrogram 1	1	220.113	226.232	514	10051.8	5	21
3375	2	Spectrogram 1	1	279.641	283.901	856.7	9823.3	5	15
3376	1	Spectrogram 1	1	55.573	58.277	856.7	11136.9	0	12
3376	1	Spectrogram 1	1	107.312	112.144	799.6	9480.7	6	15
3376	2	Spectrogram 1	1	113.01	116.017	571.1	9423.6	3	10
3376	3	Spectrogram 1	1	120.543	124.064	1313.6	9823.3	3	9
3376	4	Spectrogram 1	1	124.762	129.204	742.5	10451.6	5	13
3376	5	Spectrogram 1	1	130.823	134.054	685.3	9652	0	11
3376	6	Spectrogram 1	1	135.141	141.309	628.2	9652	0	19
3376	7	Spectrogram 1	1	143.068	145.561	1370.7	10223.1	1	11
3376	9	Spectrogram 1	1	165.243	168.461	913.8	9709.1	2	13
3376	10	Spectrogram 1	1	180.979	183.327	970.9	9537.8	1	4
3377	1	Spectrogram 1	1	0.01	3.492	384.3	9552.7	0	18
3377	2	Spectrogram 1	1	8.373	11.333	603.9	12901.6	0	17
3377	3	Spectrogram 1	1	13.359	15.651	439.2	12627.1	0	13
3377	1	Spectrogram 1	1	303.992	304.826	768.6	11858.5	1	4
3377	2	Spectrogram 1	1	564.285	566.138	603.9	11364.4	0	10
3377	3	Spectrogram 1	1	569.225	572.804	494.1	12023.2	0	19
3377	4	Spectrogram 1	1	594.134	594.958	1098	11144.8	0	5
3377	1	Spectrogram 1	1	556.197	560.578	637.6	7824.8	0	17
3377	2	Spectrogram 1	1	563.888	566.17	637.6	9621.6	0	10
3377	3	Spectrogram 1	1	568.311	571.139	985.3	9853.5	0	17
3378	1	Spectrogram 1	1	102.128	103.381	476.6	10349.1	0	9
3378	1	Spectrogram 1	1	406.969	409.251	544.7	8715	0	9
3378	1	Spectrogram 1	1	0.143	2.826	666.3	10661	2	9
3378	2	Spectrogram 1	1	5.629	9.461	732.9	10860.9	1	14
3378	3	Spectrogram 1	1	9.961	14.281	599.7	10994.2	1	16
3378	4	Spectrogram 1	1	20.919	27.664	599.7	12793.2	2	24
3378	5	Spectrogram 1	1	28.884	32.946	599.7	11060.8	1	13
3378	7	Spectrogram 1	1	56.149	58.684	599.7	10127.9	0	12
3378	8	Spectrogram 1	1	162.936	165.891	799.6	13259.6	3	11
3380	1	Spectrogram 1	1	225.722	227.563	531.5	10748.8	0	9
3380	2	Spectrogram 1	1	228.432	229.081	531.5	10630.7	0	4
3380	3	Spectrogram 1	1	229.972	232.291	354.4	11398.5	0	9
3380	4	Spectrogram 1	1	239.02	240.758	472.5	11103.2	0	8
3380	5	Spectrogram 1	1	254.558	257.214	472.5	10335.4	0	13
3380	6	Spectrogram 1	1	258.632	260.312	590.6	9803.9	0	7
3380	7	Spectrogram 1	1	324.719	327.371	708.7	11044.1	0	11
3380	8	Spectrogram 1	1	334.028	335.402	590.6	11044.1	0	7
3380	9	Spectrogram 1	1	339.751	340.787	531.5	11221.3	0	7
3380	10	Spectrogram 1	1	342.268	342.858	590.6	11044.1	0	4
3381	1	Spectrogram 1	1	19.519	24.923	644.8	13247.1	0	18
3381	2	Spectrogram 1	1	31.846	37.585	644.8	12543.7	0	25
3381	3	Spectrogram 1	1	47.445	54.252	644.8	11254.2	0	26
3381	4	Spectrogram 1	1	56.554	59.804	468.9	13071.2	0	14
3381	5	Spectrogram 1	1	72.594	78.224	586.2	12309.2	0	24
3381	6	Spectrogram 1	1	85.175	86.89	644.8	12250.6	0	8
3381	7	Spectrogram 1	1	91.728	104.382	703.4	12309.2	0	47
3381	8	Spectrogram 1	1	108.057	109.702	644.8	13364.3	0	7
3381	9	Spectrogram 1	1	117.687	118.613	527.5	10023.2	0	5
3381	10	Spectrogram 1	1	159.88	162.139	527.5	13247.1	0	10

## Sheet: Group 1 Day 60-100 Compare
Sound 1	Sound 2	%Similarity	Accuracy	%Sequential	Pitch diff	FM diff	Entropy diff	Goodness diff	AM diff	From(1)	To(1)	From(2)	To(2)	Comments
sel.02.ch01.141031.114820.77..wav	sel.01.ch01.141030.124917.17..wav	68	70.57	47.59	1.392	1.75	1.872	2.979	1.289	44	37488	44	55792	type comments here
sel.03.ch01.141031.114821.93..wav	sel.01.ch01.141030.124917.17..wav	76	72.19	44.36	1.368	1.577	1.533	3.191	1.295	44	40744	44	55792	type comments here
sel.04.ch01.141031.114823.60..wav	sel.01.ch01.141030.124917.17..wav	85	70.65	3.588	1.087	1.47	1.398	3.315	1.113	44	36828	44	55792	type comments here
sel.05.ch01.141031.114824.97..wav	sel.01.ch01.141030.124917.17..wav	57	71.24	63.8	1.314	1.667	2.457	2.721	1.285	44	51700	44	55792	type comments here
sel.01.ch01.141031.114818.42..wav	sel.02.ch01.141030.124918.48..wav	61	70.68	29.93	0.94	1.702	1.374	2.527	1.126	44	44880	44	40480	type comments here
sel.02.ch01.141031.114820.77..wav	sel.02.ch01.141030.124918.48..wav	71	66.9	58.16	1.217	1.717	1.734	2.829	1.255	44	37488	44	40480	type comments here
sel.03.ch01.141031.114821.93..wav	sel.02.ch01.141030.124918.48..wav	69	70.53	63.24	1.238	1.554	1.48	3.088	1.266	44	40744	44	40480	type comments here
sel.04.ch01.141031.114823.60..wav	sel.02.ch01.141030.124918.48..wav	80	71.99	31.1	0.966	1.463	1.313	3.148	1.085	44	36828	44	40480	type comments here
sel.05.ch01.141031.114824.97..wav	sel.02.ch01.141030.124918.48..wav	51	71.7	42.27	1.158	1.65	2.286	2.596	1.261	44	51700	44	40480	type comments here
sel.01.ch01.141031.114818.42..wav	sel.03.ch01.141030.124922.55..wav	52	70.84	41.05	1.148	1.638	1.615	2.82	1.222	44	44880	44	42592	type comments here
sel.02.ch01.141031.114820.77..wav	sel.03.ch01.141030.124922.55..wav	53	71.41	50.41	1.47	1.641	2.132	3.214	1.351	44	37488	44	42592	type comments here
sel.03.ch01.141031.114821.93..wav	sel.03.ch01.141030.124922.55..wav	69	72.74	39.89	1.433	1.441	1.569	3.382	1.36	44	40744	44	42592	type comments here
sel.04.ch01.141031.114823.60..wav	sel.03.ch01.141030.124922.55..wav	78	72.62	88.03	1.15	1.313	1.532	3.589	1.183	44	36828	44	42592	type comments here
sel.05.ch01.141031.114824.97..wav	sel.03.ch01.141030.124922.55..wav	43	73.94	70.42	1.39	1.559	2.837	2.947	1.353	44	51700	44	42592	type comments here
sel.01.ch01.141031.114818.42..wav	sel.04.ch01.141030.124924.00..wav	69	67.2	58.78	1.003	1.721	1.517	2.798	1.17	44	44880	44	45320	type comments here
sel.02.ch01.141031.114820.77..wav	sel.04.ch01.141030.124924.00..wav	65	69.94	30.9	1.28	1.731	1.94	3.119	1.299	44	37488	44	45320	type comments here
sel.03.ch01.141031.114821.93..wav	sel.04.ch01.141030.124924.00..wav	73	71.37	76.48	1.296	1.557	1.56	3.339	1.304	44	40744	44	45320	type comments here
sel.04.ch01.141031.114823.60..wav	sel.04.ch01.141030.124924.00..wav	88	68.56	15.86	1.029	1.45	1.445	3.451	1.127	44	36828	44	45320	type comments here
sel.05.ch01.141031.114824.97..wav	sel.04.ch01.141030.124924.00..wav	55	70.06	51.07	1.215	1.659	2.547	2.863	1.299	44	51700	44	45320	type comments here
sel.01.ch01.141031.114818.42..wav	sel.05.ch01.141030.124926.04..wav	58	70.41	63.1	1.015	1.735	1.434	2.68	1.272	44	44880	44	42812	type comments here
sel.02.ch01.141031.114820.77..wav	sel.05.ch01.141030.124926.04..wav	56	71.9	49.47	1.276	1.749	1.867	2.992	1.4	44	37488	44	42812	type comments here
sel.03.ch01.141031.114821.93..wav	sel.05.ch01.141030.124926.04..wav	69	70.9	51.17	1.315	1.59	1.468	3.223	1.401	44	40744	44	42812	type comments here
sel.04.ch01.141031.114823.60..wav	sel.05.ch01.141030.124926.04..wav	75	69.26	26.31	1.051	1.496	1.359	3.319	1.218	44	36828	44	42812	type comments here
sel.05.ch01.141031.114824.97..wav	sel.05.ch01.141030.124926.04..wav	50	72.66	50.76	1.225	1.68	2.484	2.747	1.399	44	51700	44	42812	type comments here
AVERAGE		65.4583	70.8442	47.8224	1.20733	1.60458	1.78137	3.03654	1.26388	44	42221.7	44	44966.2
Sound 1	Sound 2	%Similarity	Accuracy	%Sequential	Pitch diff	FM diff	Entropy diff	Goodness diff	AM diff	From(1)	To(1)	From(2)	To(2)	Comments
sel.02.3237.wav	sel.01.ch01.141030.125120.37..wav	58	67.35	46.11	0.978	1.705	2.558	4.178	1.063	44	66440	44	50732	type comments here
sel.04.3237.wav	sel.01.ch01.141030.125120.37..wav	43	70	37.86	0.998	1.735	3.03	4.666	1.078	44	71852	44	50732	type comments here
sel.05.3237.wav	sel.01.ch01.141030.125120.37..wav	54	67.71	33.2	0.93	1.696	2.873	4.643	1.088	44	46288	44	50732	type comments here
sel.06.3237.wav	sel.01.ch01.141030.125120.37..wav	59	69.92	30.46	0.998	1.713	2.648	4.785	1.093	44	37884	44	50732	type comments here
sel.01.3237.wav	sel.01.ch01.141030.125237.85..wav	54	65.04	69.44	1.058	1.727	2.767	3.946	1.104	44	67144	44	53328	type comments here
sel.02.3237.wav	sel.01.ch01.141030.125237.85..wav	50	67.91	58.89	1.063	1.687	2.648	3.917	1.068	44	66440	44	53328	type comments here
sel.04.3237.wav	sel.01.ch01.141030.125237.85..wav	47	68.98	47.39	1.098	1.721	3.172	4.403	1.089	44	71852	44	53328	type comments here
sel.05.3237.wav	sel.01.ch01.141030.125237.85..wav	56	70.35	38.32	1.022	1.682	3.015	4.413	1.095	44	46288	44	53328	type comments here
sel.06.3237.wav	sel.01.ch01.141030.125237.85..wav	50	70.31	44.68	1.085	1.699	2.801	4.555	1.103	44	37884	44	53328	type comments here
sel.01.3237.wav	sel.02.ch01.141030.125122.61..wav	59	70.43	44.52	0.984	1.64	2.422	3.863	1.108	44	67144	44	51700	type comments here
sel.02.3237.wav	sel.02.ch01.141030.125122.61..wav	59	69.31	52.53	0.998	1.6	2.383	3.834	1.071	44	66440	44	51700	type comments here
sel.04.3237.wav	sel.02.ch01.141030.125122.61..wav	51	65.21	53.11	1.011	1.634	2.796	4.338	1.094	44	71852	44	51700	type comments here
sel.05.3237.wav	sel.02.ch01.141030.125122.61..wav	56	65.37	64.42	0.947	1.594	2.64	4.365	1.099	44	46288	44	51700	type comments here
sel.06.3237.wav	sel.02.ch01.141030.125122.61..wav	60	67.9	62.09	1.017	1.614	2.4	4.527	1.105	44	37884	44	51700	type comments here
sel.01.3237.wav	sel.02.ch01.141030.125239.53..wav	50	69.04	50.68	1.08	1.751	2.798	4.176	1.128	44	67144	44	49588	type comments here
sel.02.3237.wav	sel.02.ch01.141030.125239.53..wav	52	68.74	69.01	1.08	1.706	2.592	4.141	1.091	44	66440	44	49588	type comments here
sel.04.3237.wav	sel.02.ch01.141030.125239.53..wav	42	68.67	49.01	1.128	1.748	3.233	4.621	1.114	44	71852	44	49588	type comments here
sel.05.3237.wav	sel.02.ch01.141030.125239.53..wav	52	68.19	33.96	1.046	1.702	3.075	4.581	1.119	44	46288	44	49588	type comments here
sel.06.3237.wav	sel.02.ch01.141030.125239.53..wav	47	70.37	46.27	1.105	1.722	2.893	4.701	1.125	44	37884	44	49588	type comments here
sel.01.3237.wav	sel.03.ch01.141030.125124.53..wav	57	65.18	65.87	1.093	1.676	2.646	3.794	1.079	44	67144	44	59048	type comments here
sel.02.3237.wav	sel.03.ch01.141030.125124.53..wav	62	69.15	45.01	1.094	1.635	2.552	3.761	1.044	44	66440	44	59048	type comments here
sel.04.3237.wav	sel.03.ch01.141030.125124.53..wav	49	67.82	40.66	1.141	1.675	3.041	4.245	1.063	44	71852	44	59048	type comments here
sel.05.3237.wav	sel.03.ch01.141030.125124.53..wav	60	68.49	63.7	1.057	1.629	2.887	4.231	1.071	44	46288	44	59048	type comments here
sel.06.3237.wav	sel.03.ch01.141030.125124.53..wav	58	70.18	62.09	1.117	1.65	2.666	4.37	1.075	44	37884	44	59048	type comments here
AVERAGE		53.5417	68.4008	50.3867	1.047	1.68087	2.77233	4.29392	1.09029	44	57537.3	44	52968.7
Sound 1	Sound 2	%Similarity	Accuracy	%Sequential	Pitch diff	FM diff	Entropy diff	Goodness diff	AM diff	From(1)	To(1)	From(2)	To(2)	Comments
sel.02.3238.wav	sel.01.ch01.141030.125441.17..wav	67	70.47	36.02	1.694	1.736	2.561	3.21	1.77	44	17512	44	63756	type comments here
sel.03.3238.wav	sel.01.ch01.141030.125441.17..wav	66	66.53	47.31	1.47	1.632	2.925	3.306	1.723	44	18084	44	63756	type comments here
sel.04.3238.wav	sel.01.ch01.141030.125441.17..wav	83	70.97	55.16	1.163	1.512	2.003	2.951	1.728	44	17512	44	63756	type comments here
sel.05.3238.wav	sel.01.ch01.141030.125441.17..wav	67	69.38	40.55	1.373	1.583	2.563	3.083	1.85	44	17512	44	63756	type comments here
sel.01.3238.wav	sel.02.ch01.141030.125442.74..wav	77	63.98	85.9	1.611	1.801	2.529	1.906	2.052	44	16896	44	66660	type comments here
sel.02.3238.wav	sel.02.ch01.141030.125442.74..wav	66	69.17	51.63	1.687	1.827	2.397	1.749	1.918	44	17512	44	66660	type comments here
sel.03.3238.wav	sel.02.ch01.141030.125442.74..wav	64	67.66	57.07	1.479	1.645	2.736	1.827	1.866	44	18084	44	66660	type comments here
sel.04.3238.wav	sel.02.ch01.141030.125442.74..wav	83	69.97	64.73	1.213	1.519	1.907	1.589	1.868	44	17512	44	66660	type comments here
sel.05.3238.wav	sel.02.ch01.141030.125442.74..wav	68	66.94	54.65	1.383	1.634	2.418	1.648	1.985	44	17512	44	66660	type comments here
sel.01.3238.wav	sel.03.ch01.141030.125444.41..wav	70	66.11	52.48	1.634	1.707	2.447	2.442	2.04	44	16896	44	49588	type comments here
sel.02.3238.wav	sel.03.ch01.141030.125444.41..wav	76	67.44	44.58	1.696	1.73	2.314	2.3	1.901	44	17512	44	49588	type comments here
sel.03.3238.wav	sel.03.ch01.141030.125444.41..wav	69	65.79	50.73	1.495	1.563	2.64	2.385	1.854	44	18084	44	49588	type comments here
sel.04.3238.wav	sel.03.ch01.141030.125444.41..wav	83	70.12	73.8	1.218	1.437	1.858	2.121	1.86	44	17512	44	49588	type comments here
sel.05.3238.wav	sel.03.ch01.141030.125444.41..wav	72	65.52	52.64	1.394	1.539	2.343	2.192	1.975	44	17512	44	49588	type comments here
sel.01.3238.wav	sel.04.ch01.141030.125445.75..wav	81	68.06	83.28	1.639	1.729	2.483	2.985	1.991	44	16896	44	69916	type comments here
sel.02.3238.wav	sel.04.ch01.141030.125445.75..wav	75	67.38	42.06	1.687	1.759	2.35	2.907	1.862	44	17512	44	69916	type comments here
sel.03.3238.wav	sel.04.ch01.141030.125445.75..wav	66	69.27	53.17	1.469	1.573	2.673	2.987	1.805	44	18084	44	69916	type comments here
sel.04.3238.wav	sel.04.ch01.141030.125445.75..wav	86	72.01	62.72	1.172	1.448	1.899	2.639	1.807	44	17512	44	69916	type comments here
sel.05.3238.wav	sel.04.ch01.141030.125445.75..wav	77	68.94	100	1.372	1.562	2.381	2.771	1.925	44	17512	44	69916	type comments here
sel.01.3238.wav	sel.05.ch01.141030.125448.72..wav	59	69.48	66.05	1.648	1.748	2.666	2.811	1.97	44	16896	44	47828	type comments here
sel.02.3238.wav	sel.05.ch01.141030.125448.72..wav	65	69.24	55.16	1.693	1.719	2.541	2.727	1.832	44	17512	44	47828	type comments here
sel.03.3238.wav	sel.05.ch01.141030.125448.72..wav	52	68.83	72.68	1.478	1.599	2.883	2.806	1.783	44	18084	44	47828	type comments here
sel.04.3238.wav	sel.05.ch01.141030.125448.72..wav	75	70.37	63.72	1.177	1.48	2.017	2.472	1.789	44	17512	44	47828	type comments here
sel.05.3238.wav	sel.05.ch01.141030.125448.72..wav	65	66.56	56.67	1.378	1.56	2.549	2.589	1.904	44	17512	44	47828	type comments here
AVERAGE		71.3333	68.3413	59.2817	1.46762	1.62675	2.42013	2.51679	1.87742	44	17528.5	44	59374.3
Sound 1	Sound 2	%Similarity	Accuracy	%Sequential	Pitch diff	FM diff	Entropy diff	Goodness diff	AM diff	From(1)	To(1)	From(2)	To(2)	Comments
3256sel.02.3256.wav	sel.01.ch01.141030.133209.29..wav	52	69.28	80.38	2.027	1.481	1.985	2.116	1.601	44	27412	44	28468	type comments here
sel.03.3256.wav	sel.01.ch01.141030.133209.29..wav	56	69.87	56.62	2.13	1.526	1.9	2.089	1.604	44	26620	44	28468	type comments here
sel.04.3256.wav	sel.01.ch01.141030.133209.29..wav	61	67.15	63.78	2.12	1.481	1.965	2.209	1.529	44	27016	44	28468	type comments here
sel.05.3256.wav	sel.01.ch01.141030.133209.29..wav	74	67.23	63.49	1.81	1.418	1.744	2	1.476	44	27764	44	28468	type comments here
sel.01.3256.wav	sel.02.ch01.141030.133211.25..wav	72	69.94	50.48	1.984	1.703	1.918	2.81	1.416	44	27412	44	33528	type comments here
sel.02.3256.wav	sel.02.ch01.141030.133211.25..wav	76	66.83	63.98	1.956	1.603	1.948	2.807	1.436	44	27412	44	33528	type comments here
sel.03.3256.wav	sel.02.ch01.141030.133211.25..wav	66	67.96	41.72	2.05	1.668	1.863	2.863	1.439	44	26620	44	33528	type comments here
sel.04.3256.wav	sel.02.ch01.141030.133211.25..wav	67	66.5	65.08	2.052	1.602	1.927	2.981	1.364	44	27016	44	33528	type comments here
sel.05.3256.wav	sel.02.ch01.141030.133211.25..wav	73	70.86	69.52	1.739	1.521	1.706	2.727	1.312	44	27764	44	33528	type comments here
sel.01.3256.wav	sel.03.ch01.141030.133214.17..wav	91	65.14	27.65	2.194	1.719	1.828	2.067	1.436	44	27412	44	45232	type comments here
sel.02.3256.wav	sel.03.ch01.141030.133214.17..wav	91	65.58	54.01	2.163	1.533	1.938	2.172	1.456	44	27412	44	45232	type comments here
sel.03.3256.wav	sel.03.ch01.141030.133214.17..wav	91	68.88	14.65	2.241	1.576	1.782	2.132	1.458	44	26620	44	45232	type comments here
sel.04.3256.wav	sel.03.ch01.141030.133214.17..wav	88	66.39	20.39	2.265	1.53	1.859	2.264	1.385	44	27016	44	45232	type comments here
sel.05.3256.wav	sel.03.ch01.141030.133214.17..wav	96	67.61	-5.71	1.955	1.465	1.711	2.054	1.33	44	27764	44	45232	type comments here
sel.01.3256.wav	sel.04.ch01.141030.133220.52..wav	75	68.29	14.14	2.078	1.773	1.883	2.159	1.414	44	27412	44	36432	type comments here
sel.02.3256.wav	sel.04.ch01.141030.133220.52..wav	86	66.81	-9.59	2.035	1.598	1.934	2.17	1.443	44	27412	44	36432	type comments here
sel.03.3256.wav	sel.04.ch01.141030.133220.52..wav	83	67.85	17.94	2.136	1.649	1.832	2.214	1.438	44	26620	44	36432	type comments here
sel.04.3256.wav	sel.04.ch01.141030.133220.52..wav	80	69.59	24.63	2.153	1.592	1.896	2.354	1.369	44	27016	44	36432	type comments here
sel.05.3256.wav	sel.04.ch01.141030.133220.52..wav	83	70.11	2.857	1.832	1.529	1.697	2.101	1.313	44	27764	44	36432	type comments here
sel.01.3256.wav	sel.05.ch01.141030.133222.91..wav	75	68.27	14.14	2.292	1.79	2.341	2.633	1.49	44	27412	44	36432	type comments here
sel.02.3256.wav	sel.05.ch01.141030.133222.91..wav	77	66.62	52.09	2.258	1.627	2.365	2.67	1.502	44	27412	44	36432	type comments here
sel.03.3256.wav	sel.05.ch01.141030.133222.91..wav	70	67.83	80.46	2.32	1.678	2.285	2.695	1.507	44	26620	44	36432	type comments here
sel.04.3256.wav	sel.05.ch01.141030.133222.91..wav	68	69.1	27.89	2.367	1.628	2.348	2.82	1.432	44	27016	44	36432	type comments here
sel.05.3256.wav	sel.05.ch01.141030.133222.91..wav	83	67.06	42.22	2.058	1.558	2.123	2.574	1.381	44	27764	44	36432	type comments here
AVERAGE		76.4167	67.9479	38.8674	2.09229	1.59367	1.94908	2.40338	1.43879	44	27237.8	44	36333
3261sel.02.3261.wav	sel.01.ch01.141030.133651.28..wav	56	70.93	44.83	1.127	1.72	3.063	3.11	1.649	44	33704	44	52360	type comments here
sel.03.3261.wav	sel.01.ch01.141030.133651.28..wav	50	67.66	62	1.192	1.77	3.17	3.09	1.67	44	34320	44	52360	type comments here
sel.04.3261.wav	sel.01.ch01.141030.133651.28..wav	55	70.45	50.32	1.113	1.885	2.685	2.878	1.628	44	33704	44	52360	type comments here
sel.05.3261.wav	sel.01.ch01.141030.133651.28..wav	76	65.2	60.25	0.987	1.716	1.898	2.882	1.496	44	27940	44	52360	type comments here
sel.01.3261.wav	sel.02.ch01.141030.133653.62..wav	73	73.14	56.86	1.099	1.815	1.54	2.847	1.611	44	34320	44	44396	type comments here
sel.02.3261.wav	sel.02.ch01.141030.133653.62..wav	70	72.58	51.11	1.082	1.76	1.59	2.831	1.572	44	33704	44	44396	type comments here
sel.03.3261.wav	sel.02.ch01.141030.133653.62..wav	71	73.4	45.05	1.145	1.813	1.695	2.812	1.599	44	34320	44	44396	type comments here
sel.04.3261.wav	sel.02.ch01.141030.133653.62..wav	76	73.45	40.66	1.068	1.925	1.642	2.629	1.558	44	33704	44	44396	type comments here
sel.05.3261.wav	sel.02.ch01.141030.133653.62..wav	74	70.84	62.14	0.946	1.756	1.405	2.645	1.417	44	27940	44	44396	type comments here
sel.01.3261.wav	sel.03.ch01.141030.133657.04..wav	57	68.35	63.54	1.139	1.881	3.088	3.114	1.865	44	34320	44	46376	type comments here
sel.02.3261.wav	sel.03.ch01.141030.133657.04..wav	58	68.66	58.16	1.122	1.832	3.183	3.111	1.834	44	33704	44	46376	type comments here
sel.03.3261.wav	sel.03.ch01.141030.133657.04..wav	51	71.04	77.92	1.187	1.88	3.299	3.079	1.854	44	34320	44	46376	type comments here
sel.04.3261.wav	sel.03.ch01.141030.133657.04..wav	62	69.44	44.57	1.107	1.996	2.828	2.89	1.817	44	33704	44	46376	type comments here
sel.05.3261.wav	sel.03.ch01.141030.133657.04..wav	65	71.4	75.39	0.984	1.826	2.073	2.893	1.678	44	27940	44	46376	type comments here
sel.01.3261.wav	sel.04.ch01.141030.133658.72..wav	60	71.68	55.05	0.945	1.739	2.405	3.175	1.766	44	34320	44	48972	type comments here
sel.02.3261.wav	sel.04.ch01.141030.133658.72..wav	56	70.15	65.75	0.915	1.679	2.503	3.171	1.721	44	33704	44	48972	type comments here
sel.03.3261.wav	sel.04.ch01.141030.133658.72..wav	56	71.13	46.34	0.982	1.732	2.606	3.15	1.75	44	34320	44	48972	type comments here
sel.04.3261.wav	sel.04.ch01.141030.133658.72..wav	60	72.19	58.69	0.903	1.851	2.224	2.953	1.71	44	33704	44	48972	type comments here
sel.05.3261.wav	sel.04.ch01.141030.133658.72..wav	70	70.58	66.87	0.77	1.674	1.569	2.959	1.567	44	27940	44	48972	type comments here
sel.01.3261.wav	sel.05.ch01.141030.133700.07..wav	66	70.22	40.94	0.869	1.692	2.281	2.94	1.682	44	34320	44	57728	type comments here
sel.02.3261.wav	sel.05.ch01.141030.133700.07..wav	69	69.5	44.05	0.844	1.641	2.371	2.936	1.644	44	33704	44	57728	type comments here
sel.03.3261.wav	sel.05.ch01.141030.133700.07..wav	74	69.75	37.86	0.91	1.691	2.478	2.898	1.669	44	34320	44	57728	type comments here
sel.04.3261.wav	sel.05.ch01.141030.133700.07..wav	74	70.58	51.23	0.83	1.809	2.131	2.717	1.629	44	33704	44	57728	type comments here
sel.05.3261.wav	sel.05.ch01.141030.133700.07..wav	76	64.5	36.9	0.7	1.636	1.526	2.723	1.489	44	27940	44	57728	type comments here
AVERAGE		64.7917	70.2842	54.02	0.998583	1.77996	2.30221	2.93471	1.66146	44	32734.2	44	49866.7
3262
sel.02.3262.wav	sel.01.ch01.141030.134252.76..wav	65	71.84	20.13	3.052	1.731	2.771	4.133	1.258	44	25388	44	36784	type comments here
sel.03.3262.wav	sel.01.ch01.141030.134252.76..wav	60	70.5	55.14	3.04	1.748	2.657	4.125	1.297	44	28688	44	36784	type comments here
sel.04.3262.wav	sel.01.ch01.141030.134252.76..wav	63	72.45	48.24	2.987	1.824	2.587	3.686	1.254	44	27588	44	36784	type comments here
sel.05.3262.wav	sel.01.ch01.141030.134252.76..wav	74	69.66	42.23	2.983	1.805	2.387	3.757	1.318	44	22132	44	36784	type comments here
sel.01.3262.wav	sel.02.ch01.141030.134255.48..wav	55	73.1	61.62	2.488	1.512	2.209	3.512	1.191	44	15180	44	28644	type comments here
sel.02.3262.wav	sel.02.ch01.141030.134255.48..wav	71	68.25	44.69	2.321	1.534	2.072	3.919	1.127	44	25388	44	28644	type comments here
sel.03.3262.wav	sel.02.ch01.141030.134255.48..wav	56	71.39	63.03	2.189	1.565	2.033	3.981	1.163	44	28688	44	28644	type comments here
sel.04.3262.wav	sel.02.ch01.141030.134255.48..wav	60	72.62	88.49	2.191	1.613	1.957	3.429	1.126	44	27588	44	28644	type comments here
sel.05.3262.wav	sel.02.ch01.141030.134255.48..wav	67	70.16	77.68	2.187	1.612	1.864	3.524	1.192	44	22132	44	28644	type comments here
sel.01.3262.wav	sel.03.ch01.141030.134258.13..wav	55	70.43	55.23	2.31	1.436	2.001	3.425	1.365	44	15180	44	32868	type comments here
sel.02.3262.wav	sel.03.ch01.141030.134258.13..wav	60	73.05	54.86	2.154	1.463	1.86	3.802	1.298	44	25388	44	32868	type comments here
sel.03.3262.wav	sel.03.ch01.141030.134258.13..wav	64	69.93	68.04	2.015	1.487	1.825	3.817	1.327	44	28688	44	32868	type comments here
sel.04.3262.wav	sel.03.ch01.141030.134258.13..wav	74	71.27	83.38	2.011	1.548	1.747	3.355	1.304	44	27588	44	32868	type comments here
sel.05.3262.wav	sel.03.ch01.141030.134258.13..wav	76	73.67	48.2	2.013	1.536	1.66	3.458	1.363	44	22132	44	32868	type comments here
sel.01.3262.wav	sel.04.ch01.141030.134301.16..wav	62	70.43	67.44	2.437	1.459	2.171	3.382	1.14	44	15180	44	34012	type comments here
sel.02.3262.wav	sel.04.ch01.141030.134301.16..wav	66	70.01	58.68	2.225	1.47	2.032	3.824	1.078	44	25388	44	34012	type comments here
sel.03.3262.wav	sel.04.ch01.141030.134301.16..wav	70	73.01	49	2.015	1.506	1.991	3.778	1.116	44	28688	44	34012	type comments here
sel.04.3262.wav	sel.04.ch01.141030.134301.16..wav	71	73.95	62.93	2.041	1.523	1.917	3.316	1.073	44	27588	44	34012	type comments here
sel.05.3262.wav	sel.04.ch01.141030.134301.16..wav	69	72.77	80.87	2.039	1.552	1.83	3.319	1.14	44	22132	44	34012	type comments here
sel.01.3262.wav	sel.05.ch01.141030.134304.47..wav	71	74.51	23.25	2.373	1.362	2.125	3.435	1.264	44	15180	44	30580	type comments here
sel.02.3262.wav	sel.05.ch01.141030.134304.47..wav	60	72.25	54.16	2.217	1.406	1.913	3.768	1.198	44	25388	44	30580	type comments here
sel.03.3262.wav	sel.05.ch01.141030.134304.47..wav	60	72.87	72.35	2.096	1.428	1.915	3.792	1.233	44	28688	44	30580	type comments here
sel.04.3262.wav	sel.05.ch01.141030.134304.47..wav	75	71.64	82.1	2.089	1.497	1.836	3.372	1.196	44	27588	44	30580	type comments here
sel.05.3262.wav	sel.05.ch01.141030.134304.47..wav	66	73.37	49.8	2.081	1.477	1.819	3.508	1.256	44	22132	44	30580	type comments here
AVERAGE		65.4167	71.7971	58.8142	2.31475	1.54558	2.04913	3.64237	1.21988	44	24154.2	44	32402.3
3263
sel.02.3263.wav	sel.01.ch01.141030.134619.49..wav	95	69.13	89.93	2.578	2.468	5.211	3.339	1.266	44	19272	44	10406	type comments here
sel.03.3263.wav	sel.01.ch01.141030.134619.49..wav	93	70.86	84.69	2.606	2.603	5.751	3.575	1.294	44	17292	44	10406	type comments here
sel.04.3263.wav	sel.01.ch01.141030.134619.49..wav	100	71.84	100	3.175	2.736	5.296	3.783	1.179	44	13244	44	10406	type comments here
sel.05.3263.wav	sel.01.ch01.141030.134619.49..wav	99	70.41	86.72	2.563	2.742	5.512	3.55	1.356	44	18612	44	10406	type comments here
sel.01.3263.wav	sel.02.ch01.141030.134621.98..wav	70	72.43	100	2.004	2.286	4.213	3.299	1.319	44	18304	44	63580	type comments here
sel.02.3263.wav	sel.02.ch01.141030.134621.98..wav	89	68.96	89.47	2.348	2.242	3.898	3.514	1.338	44	19272	44	63580	type comments here
sel.03.3263.wav	sel.02.ch01.141030.134621.98..wav	78	73.02	87.24	2.395	2.355	4.27	3.631	1.361	44	17292	44	63580	type comments here
sel.04.3263.wav	sel.02.ch01.141030.134621.98..wav	96	72.17	100	3.031	2.496	3.993	3.781	1.247	44	13244	44	63580	type comments here
sel.05.3263.wav	sel.02.ch01.141030.134621.98..wav	87	72.16	83.41	2.337	2.484	4.173	3.638	1.424	44	18612	44	63580	type comments here
sel.01.3263.wav	sel.03.ch01.141030.134624.58..wav	89	71.1	85.54	2.054	1.795	2.255	1.763	1.42	44	18304	44	28952	type comments here
sel.02.3263.wav	sel.03.ch01.141030.134624.58..wav	90	70.18	87.64	2.424	1.78	2.184	1.971	1.433	44	19272	44	28952	type comments here
sel.03.3263.wav	sel.03.ch01.141030.134624.58..wav	83	72.98	100	2.488	1.852	2.338	2.082	1.447	44	17292	44	28952	type comments here
sel.04.3263.wav	sel.03.ch01.141030.134624.58..wav	97	70.4	100	3.212	2.044	2.291	2.216	1.362	44	13244	44	28952	type comments here
sel.05.3263.wav	sel.03.ch01.141030.134624.58..wav	90	73.22	100	2.398	1.94	2.433	2.092	1.51	44	18612	44	28952	type comments here
sel.01.3263.wav	sel.04.ch01.141030.134625.71..wav	81	72.26	100	2.068	1.811	2.439	2.053	1.55	44	18304	44	26048	type comments here
sel.02.3263.wav	sel.04.ch01.141030.134625.71..wav	88	67.11	100	2.427	1.803	2.362	2.281	1.56	44	19272	44	26048	type comments here
sel.03.3263.wav	sel.04.ch01.141030.134625.71..wav	84	67.05	100	2.511	1.862	2.518	2.376	1.577	44	17292	44	26048	type comments here
sel.04.3263.wav	sel.04.ch01.141030.134625.71..wav	97	69.87	100	3.21	2.057	2.47	2.5	1.483	44	13244	44	26048	type comments here
sel.05.3263.wav	sel.04.ch01.141030.134625.71..wav	79	69.62	100	2.416	1.968	2.61	2.384	1.635	44	18612	44	26048	type comments here
sel.01.3263.wav	sel.05.ch01.141030.134627.55..wav	84	75.18	100	2.225	1.906	2.275	2.035	1.593	44	18304	44	27192	type comments here
sel.02.3263.wav	sel.05.ch01.141030.134627.55..wav	84	70.61	100	2.584	1.887	2.232	2.26	1.601	44	19272	44	27192	type comments here
sel.03.3263.wav	sel.05.ch01.141030.134627.55..wav	81	72.3	100	2.664	1.944	2.359	2.35	1.628	44	17292	44	27192	type comments here
sel.04.3263.wav	sel.05.ch01.141030.134627.55..wav	100	73.16	100	3.416	2.134	2.353	2.483	1.505	44	13244	44	27192	type comments here
sel.05.3263.wav	sel.05.ch01.141030.134627.55..wav	81	74.64	100	2.572	2.05	2.474	2.362	1.691	44	18612	44	27192	type comments here
AVERAGE		88.125	71.2775	95.61	2.57108	2.13521	3.24625	2.72158	1.44912	44	17304.8	44	32103.5
3368sel.02.3368.wav	sel.01.ch01.141030.135402.98..wav	55	68.73	35.38	1.881	1.801	1.886	3.447	1.363	44	17204	44	22792	type comments here
sel.03.3368.wav	sel.01.ch01.141030.135402.98..wav	52	69.94	81.45	2.805	1.94	2.543	3.085	1.464	44	19976	44	22792	type comments here
sel.04.3368.wav	sel.01.ch01.141030.135402.98..wav	41	72.24	51.55	2.098	2.218	1.84	2.981	1.313	44	24112	44	22792	type comments here
sel.05.3368.wav	sel.01.ch01.141030.135402.98..wav	57	71.02	53.24	2.526	1.748	2.595	2.97	1.35	44	23760	44	22792	type comments here
sel.01.3368.wav	sel.02.ch01.141030.135404.21..wav	70	69.14	56.61	1.869	1.617	2.097	3.158	1.476	44	20328	44	30272	type comments here
sel.02.3368.wav	sel.02.ch01.141030.135404.21..wav	80	64.22	33.84	0.895	1.566	1.653	3.819	1.36	44	17204	44	30272	type comments here
sel.03.3368.wav	sel.02.ch01.141030.135404.21..wav	66	69.37	81.45	2.131	1.712	2.501	3.512	1.458	44	19976	44	30272	type comments here
sel.04.3368.wav	sel.02.ch01.141030.135404.21..wav	73	63.32	15.9	1.004	1.943	1.675	3.339	1.304	44	24112	44	30272	type comments here
sel.05.3368.wav	sel.02.ch01.141030.135404.21..wav	67	70.24	35.06	1.683	1.524	2.542	3.389	1.342	44	23760	44	30272	type comments here
sel.01.3368.wav	sel.03.ch01.141030.135405.76..wav	64	69.8	64.42	2.387	1.707	2.527	3.174	1.466	44	20328	44	29436	type comments here
sel.02.3368.wav	sel.03.ch01.141030.135405.76..wav	81	69.01	61.53	1.544	1.662	2.132	3.674	1.346	44	17204	44	29436	type comments here
sel.03.3368.wav	sel.03.ch01.141030.135405.76..wav	67	71.62	16.55	2.541	1.801	2.916	3.555	1.453	44	19976	44	29436	type comments here
sel.04.3368.wav	sel.03.ch01.141030.135405.76..wav	70	66.45	25.77	1.729	2.029	2.129	3.221	1.297	44	24112	44	29436	type comments here
sel.05.3368.wav	sel.03.ch01.141030.135405.76..wav	58	69.68	31.37	2.218	1.609	2.968	3.432	1.33	44	23760	44	29436	type comments here
sel.01.3368.wav	sel.04.ch01.141030.135407.94..wav	54	69.88	73.1	2.773	1.72	2.628	2.05	1.343	44	20328	44	18568	type comments here
sel.02.3368.wav	sel.04.ch01.141030.135407.94..wav	47	69.88	72.3	2.085	1.685	2.25	3.36	1.226	44	17204	44	18568	type comments here
sel.03.3368.wav	sel.04.ch01.141030.135407.94..wav	60	67.39	45.25	2.796	1.828	3.006	2.395	1.334	44	19976	44	18568	type comments here
sel.04.3368.wav	sel.04.ch01.141030.135407.94..wav	37	72.55	65.99	2.37	2.119	2.243	2.793	1.17	44	24112	44	18568	type comments here
sel.05.3368.wav	sel.04.ch01.141030.135407.94..wav	44	71.1	53.61	2.615	1.631	3.058	2.243	1.211	44	23760	44	18568	type comments here
sel.01.3368.wav	sel.05.ch01.141030.135411.58..wav	61	69.03	59.65	2.734	1.888	2.138	3.157	1.62	44	20328	44	21472	type comments here
sel.02.3368.wav	sel.05.ch01.141030.135411.58..wav	51	71.02	41.02	1.969	1.851	1.812	3.632	1.502	44	17204	44	21472	type comments here
sel.03.3368.wav	sel.05.ch01.141030.135411.58..wav	58	70.74	84.54	2.805	2.005	2.496	3.538	1.611	44	19976	44	21472	type comments here
sel.04.3368.wav	sel.05.ch01.141030.135411.58..wav	44	69.38	55.39	2.203	2.309	1.776	3.201	1.45	44	24112	44	21472	type comments here
sel.05.3368.wav	sel.05.ch01.141030.135411.58..wav	55	69	53.61	2.567	1.791	2.546	3.424	1.484	44	23760	44	21472	type comments here
AVERAGE		58.8333	69.3646	52.0242	2.17617	1.821	2.33154	3.18954	1.38637	44	21107.2	44	24579.5
3367sel.02.3367.wav	sel.01.ch01.141030.135023.61..wav	70	70.66	51.3	1.593	1.718	2.495	4.021	1.247	44	55880	44	57904	type comments here
sel.03.3367.wav	sel.01.ch01.141030.135023.61..wav	67	73.6	52.02	1.446	1.747	2.174	3.632	1.321	44	52316	44	57904	type comments here
sel.04.3367.wav	sel.01.ch01.141030.135023.61..wav	63	69.02	41.44	1.528	1.677	2.553	3.702	1.357	44	51744	44	57904	type comments here
sel.05.3367.wav	sel.01.ch01.141030.135023.61..wav	64	70.58	50.63	1.497	1.653	2.104	3.587	1.419	44	58872	44	57904	type comments here
sel.01.3367.wav	sel.02.ch01.141030.135025.01..wav	49	71.27	62.88	1.756	1.975	2.557	3.604	1.544	44	70708	44	51876	type comments here
sel.02.3367.wav	sel.02.ch01.141030.135025.01..wav	58	69.88	58.55	1.731	1.79	2.386	3.569	1.447	44	55880	44	51876	type comments here
sel.03.3367.wav	sel.02.ch01.141030.135025.01..wav	64	70	60.77	1.587	1.81	2.071	3.164	1.525	44	52316	44	51876	type comments here
sel.04.3367.wav	sel.02.ch01.141030.135025.01..wav	55	68.4	50.97	1.667	1.73	2.446	3.16	1.558	44	51744	44	51876	type comments here
sel.05.3367.wav	sel.02.ch01.141030.135025.01..wav	58	68.11	37.77	1.624	1.709	2	3.051	1.62	44	58872	44	51876	type comments here
sel.01.3367.wav	sel.03.ch01.141030.135029.80..wav	45	72.09	62.76	1.579	1.95	3.025	4.423	1.619	44	70708	44	53328	type comments here
sel.02.3367.wav	sel.03.ch01.141030.135029.80..wav	55	72.26	65.64	1.568	1.765	2.839	4.388	1.521	44	55880	44	53328	type comments here
sel.03.3367.wav	sel.03.ch01.141030.135029.80..wav	61	72.47	62.6	1.423	1.802	2.519	3.979	1.602	44	52316	44	53328	type comments here
sel.04.3367.wav	sel.03.ch01.141030.135029.80..wav	54	74.69	57.78	1.502	1.738	2.897	3.984	1.632	44	51744	44	53328	type comments here
sel.05.3367.wav	sel.03.ch01.141030.135029.80..wav	52	73.03	52.13	1.484	1.713	2.427	3.879	1.696	44	58872	44	53328	type comments here
sel.01.3367.wav	sel.04.ch01.141030.135031.20..wav	39	70.68	48.81	1.764	2.109	2.534	3.55	1.654	44	70708	44	47652	type comments here
sel.02.3367.wav	sel.04.ch01.141030.135031.20..wav	50	71.1	52.71	1.743	1.918	2.356	3.529	1.554	44	55880	44	47652	type comments here
sel.03.3367.wav	sel.04.ch01.141030.135031.20..wav	53	72.23	37.03	1.6	1.924	2.043	3.121	1.639	44	52316	44	47652	type comments here
sel.04.3367.wav	sel.04.ch01.141030.135031.20..wav	53	69.75	56.42	1.681	1.826	2.414	3.115	1.664	44	51744	44	47652	type comments here
sel.05.3367.wav	sel.04.ch01.141030.135031.20..wav	46	71.92	54.52	1.638	1.798	1.965	3.007	1.73	44	58872	44	47652	type comments here
sel.01.3367.wav	sel.05.ch01.141030.135032.47..wav	53	68.85	39.72	1.488	1.924	2.754	3.784	1.431	44	70708	44	65692	type comments here
sel.02.3367.wav	sel.05.ch01.141030.135032.47..wav	69	69.14	42	1.48	1.747	2.566	3.764	1.338	44	55880	44	65692	type comments here
sel.03.3367.wav	sel.05.ch01.141030.135032.47..wav	69	74.27	42.42	1.332	1.775	2.253	3.351	1.41	44	52316	44	65692	type comments here
sel.04.3367.wav	sel.05.ch01.141030.135032.47..wav	68	72.46	65.44	1.414	1.704	2.625	3.338	1.446	44	51744	44	65692	type comments here
sel.05.3367.wav	sel.05.ch01.141030.135032.47..wav	64	69.87	18.17	1.395	1.681	2.163	3.237	1.507	44	58872	44	65692	type comments here
AVERAGE		57.4583	71.0971	51.02	1.56333	1.79929	2.42358	3.58079	1.52004	44	57370.5	44	55181.5
3375sel.02.3375.wav	sel.01.ch01.141030.135638.61..wav	34	79.9	67.08	1.119	1.695	2.583	3.6	1.374	44	55660	44	39688	type comments here
sel.03.3375.wav	sel.01.ch01.141030.135638.61..wav	37	80.33	64.22	1.078	1.708	2.764	3.465	1.253	44	51700	44	39688	type comments here
sel.04.3375.wav	sel.01.ch01.141030.135638.61..wav	37	80.35	63.62	1.109	1.638	2.611	3.285	1.36	44	50116	44	39688	type comments here
sel.05.3375.wav	sel.01.ch01.141030.135638.61..wav	37	79.05	64.05	1.125	1.725	2.684	3.257	1.308	44	51700	44	39688	type comments here
sel.01.3375.wav	sel.02.ch01.141030.135641.77..wav	32	81.6	70.19	1.277	1.533	2.782	3.523	1.382	44	52888	44	39204	type comments here
sel.02.3375.wav	sel.02.ch01.141030.135641.77..wav	31	81.75	68.98	1.3	1.621	2.95	3.761	1.383	44	55660	44	39204	type comments here
sel.03.3375.wav	sel.02.ch01.141030.135641.77..wav	33	84.5	69.16	1.253	1.643	3.143	3.623	1.262	44	51700	44	39204	type comments here
sel.04.3375.wav	sel.02.ch01.141030.135641.77..wav	33	81.73	66.43	1.276	1.563	2.982	3.448	1.367	44	50116	44	39204	type comments here
sel.05.3375.wav	sel.02.ch01.141030.135641.77..wav	32	84.23	69.16	1.291	1.662	3.044	3.411	1.323	44	51700	44	39204	type comments here
sel.01.3375.wav	sel.03.ch01.141030.135643.46..wav	65	77.41	21.56	1.137	1.62	2.378	4.52	1.396	44	52888	44	58564	type comments here
sel.02.3375.wav	sel.03.ch01.141030.135643.46..wav	62	77.25	32.27	1.129	1.676	2.455	4.836	1.397	44	55660	44	58564	type comments here
sel.03.3375.wav	sel.03.ch01.141030.135643.46..wav	67	78.46	18.56	1.088	1.657	2.615	4.709	1.277	44	51700	44	58564	type comments here
sel.04.3375.wav	sel.03.ch01.141030.135643.46..wav	64	78.73	12.82	1.118	1.61	2.478	4.566	1.381	44	50116	44	58564	type comments here
sel.05.3375.wav	sel.03.ch01.141030.135643.46..wav	63	77.6	13.79	1.134	1.687	2.587	4.529	1.334	44	51700	44	58564	type comments here
sel.01.3375.wav	sel.04.ch01.141030.135645.19..wav	58	78.11	34.88	1.188	1.614	2.59	4.537	1.299	44	52888	44	50600	type comments here
sel.02.3375.wav	sel.04.ch01.141030.135645.19..wav	57	77.92	35.91	1.191	1.663	2.68	4.896	1.298	44	55660	44	50600	type comments here
sel.03.3375.wav	sel.04.ch01.141030.135645.19..wav	61	78.29	31.51	1.146	1.63	2.844	4.757	1.177	44	51700	44	50600	type comments here
sel.04.3375.wav	sel.04.ch01.141030.135645.19..wav	57	79.81	25.48	1.176	1.591	2.703	4.63	1.285	44	50116	44	50600	type comments here
sel.05.3375.wav	sel.04.ch01.141030.135645.19..wav	60	78.71	22.82	1.191	1.665	2.805	4.577	1.241	44	51700	44	50600	type comments here
sel.01.3375.wav	sel.05.ch01.141030.135647.28..wav	62	80.48	34.72	1.07	1.554	2.376	3.83	1.287	44	52888	44	57904	type comments here
sel.02.3375.wav	sel.05.ch01.141030.135647.28..wav	57	80.76	42.24	1.062	1.611	2.483	4.154	1.29	44	55660	44	57904	type comments here
sel.03.3375.wav	sel.05.ch01.141030.135647.28..wav	61	76.15	39.69	1.02	1.596	2.654	4.027	1.169	44	51700	44	57904	type comments here
sel.04.3375.wav	sel.05.ch01.141030.135647.28..wav	60	82.31	31.98	1.052	1.547	2.51	3.888	1.273	44	50116	44	57904	type comments here
sel.05.3375.wav	sel.05.ch01.141030.135647.28..wav	60	81.24	29.64	1.067	1.62	2.599	3.857	1.223	44	51700	44	57904	type comments here
AVERAGE		50.8333	79.8612	42.9483	1.14987	1.63037	2.67917	4.07025	1.30579	44	52393	44	49588
3376sel.02.3376.wav	sel.01.ch01.141030.135919.18..wav	33	67.04	74.76	1.337	1.732	1.946	4.427	0.864	44	58212	44	43428	type comments here
sel.03.3376.wav	sel.01.ch01.141030.135919.18..wav	27	74.21	78.47	1.27	1.604	1.839	4.018	0.89	44	65868	44	43428	type comments here
sel.04.3376.wav	sel.01.ch01.141030.135919.18..wav	31	68.15	77.4	1.245	1.6	1.806	4.142	0.857	44	66264	44	43428	type comments here
sel.05.3376.wav	sel.01.ch01.141030.135919.18..wav	37	70.56	72.11	1.365	1.609	1.871	4.431	0.867	44	59400	44	43428	type comments here
sel.01.3376.wav	sel.02.ch01.141030.135920.57..wav	52	67.71	47.36	1.335	1.715	2.208	4.441	0.819	44	59796	44	49764	type comments here
sel.02.3376.wav	sel.02.ch01.141030.135920.57..wav	52	66.99	54.25	1.34	1.742	2.087	4.381	0.805	44	58212	44	49764	type comments here
sel.03.3376.wav	sel.02.ch01.141030.135920.57..wav	52	72.21	49.33	1.273	1.611	1.98	3.846	0.834	44	65868	44	49764	type comments here
sel.04.3376.wav	sel.02.ch01.141030.135920.57..wav	51	70.09	63.32	1.247	1.614	1.948	4.029	0.799	44	66264	44	49764	type comments here
sel.05.3376.wav	sel.02.ch01.141030.135920.57..wav	49	68.23	61.89	1.367	1.627	2.014	4.337	0.804	44	59400	44	49764	type comments here
sel.01.3376.wav	sel.03.ch01.141030.135922.56..wav	32	67.5	67.01	1.224	1.775	1.889	4.107	0.886	44	59796	44	37268	type comments here
sel.02.3376.wav	sel.03.ch01.141030.135922.56..wav	34	66.07	69.44	1.227	1.799	1.774	4.027	0.874	44	58212	44	37268	type comments here
sel.03.3376.wav	sel.03.ch01.141030.135922.56..wav	30	73.72	73.26	1.166	1.671	1.669	3.556	0.9	44	65868	44	37268	type comments here
sel.04.3376.wav	sel.03.ch01.141030.135922.56..wav	30	67.36	72.49	1.14	1.673	1.636	3.71	0.872	44	66264	44	37268	type comments here
sel.05.3376.wav	sel.03.ch01.141030.135922.56..wav	33	69.49	66.79	1.259	1.689	1.7	4.007	0.882	44	59400	44	37268	type comments here
sel.01.3376.wav	sel.04.ch01.141030.135923.44..wav	35	69.29	71.57	1.297	1.653	1.856	4.12	0.854	44	59796	44	36256	type comments here
sel.02.3376.wav	sel.04.ch01.141030.135923.44..wav	38	69.09	60.51	1.298	1.668	1.745	4.035	0.842	44	58212	44	36256	type comments here
sel.03.3376.wav	sel.04.ch01.141030.135923.44..wav	32	77.89	73.93	1.236	1.562	1.643	3.644	0.87	44	65868	44	36256	type comments here
sel.04.3376.wav	sel.04.ch01.141030.135923.44..wav	32	72.62	71.56	1.209	1.566	1.611	3.726	0.835	44	66264	44	36256	type comments here
sel.05.3376.wav	sel.04.ch01.141030.135923.44..wav	35	72.67	73.9	1.327	1.572	1.669	4.022	0.843	44	59400	44	36256	type comments here
sel.01.3376.wav	sel.06.ch01.141030.135926.26..wav	29	64.39	68.63	1.339	1.691	2.223	4.33	0.927	44	59796	44	44088	type comments here
sel.02.3376.wav	sel.06.ch01.141030.135926.26..wav	33	66.61	68.82	1.35	1.721	2.093	4.285	0.917	44	58212	44	44088	type comments here
sel.03.3376.wav	sel.06.ch01.141030.135926.26..wav	38	72.71	67.48	1.282	1.591	1.981	3.711	0.948	44	65868	44	44088	type comments here
sel.04.3376.wav	sel.06.ch01.141030.135926.26..wav	34	69.25	61.99	1.25	1.585	1.946	3.911	0.907	44	66264	44	44088	type comments here
sel.05.3376.wav	sel.06.ch01.141030.135926.26..wav	35	67.51	59.82	1.369	1.6	2.021	4.217	0.913	44	59400	44	44088	type comments here
AVERAGE		36.8333	69.64	66.9204	1.28133	1.65292	1.88146	4.06083	0.867042	44	61996	44	42108
3377sel.02.3377.wav	sel.01.ch01.141030.140108.40..wav	44	70.44	47.08	1.432	1.914	3.74	5.564	1.212	44	33308	44	39864	type comments here
sel.03.3377.wav	sel.01.ch01.141030.140108.40..wav	61	68.93	68.29	1.188	1.751	3.463	5.224	1.188	44	32340	44	39864	type comments here
sel.04.3377.wav	sel.01.ch01.141030.140108.40..wav	50	66.87	35.9	1.543	1.868	3.55	5.242	1.286	44	32032	44	39864	type comments here
sel.01.3377.wav	sel.02.ch01.141030.140110.41..wav	52	73.02	45.21	1.791	1.873	2.764	4.477	1.223	44	33616	44	38720	type comments here
sel.02.3377.wav	sel.02.ch01.141030.140110.41..wav	51	71.2	62.16	1.83	1.994	2.926	4.707	1.183	44	33308	44	38720	type comments here
sel.03.3377.wav	sel.02.ch01.141030.140110.41..wav	55	72.31	43.86	1.626	1.847	2.693	4.557	1.165	44	32340	44	38720	type comments here
sel.04.3377.wav	sel.02.ch01.141030.140110.41..wav	62	69.14	57.08	1.902	1.951	2.826	4.457	1.26	44	32032	44	38720	type comments here
sel.01.3377.wav	sel.03.ch01.141030.140112.05..wav	44	69.92	62.51	1.939	2.021	3.302	5.401	1.198	44	33616	44	31416	type comments here
sel.02.3377.wav	sel.03.ch01.141030.140112.05..wav	44	68.24	79.36	1.983	2.152	3.551	5.681	1.16	44	33308	44	31416	type comments here
sel.03.3377.wav	sel.03.ch01.141030.140112.05..wav	44	68.99	47.68	1.815	2.004	3.291	5.392	1.139	44	32340	44	31416	type comments here
sel.04.3377.wav	sel.03.ch01.141030.140112.05..wav	36	74.04	84.04	2.031	2.105	3.403	5.38	1.237	44	32032	44	31416	type comments here
sel.01.3377.wav	sel.04.ch01.141030.140113.77..wav	46	70.48	63.04	1.703	1.836	3.71	5.629	1.214	44	33616	44	38060	type comments here
sel.02.3377.wav	sel.04.ch01.141030.140113.77..wav	43	68.55	76.71	1.743	1.941	4.043	5.945	1.174	44	33308	44	38060	type comments here
sel.03.3377.wav	sel.04.ch01.141030.140113.77..wav	43	65.68	47.68	1.543	1.809	3.764	5.584	1.156	44	32340	44	38060	type comments here
sel.04.3377.wav	sel.04.ch01.141030.140113.77..wav	39	68.83	64.51	1.81	1.912	3.849	5.62	1.251	44	32032	44	38060	type comments here
sel.01.3377.wav	sel.05.ch01.141030.140115.98..wav	43	69.63	76.4	1.954	2.019	3.38	4.979	1.275	44	33616	44	33660	type comments here
sel.02.3377.wav	sel.05.ch01.141030.140115.98..wav	46	68.26	68.25	1.993	2.17	3.636	5.228	1.234	44	33308	44	33660	type comments here
sel.03.3377.wav	sel.05.ch01.141030.140115.98..wav	46	70.62	62.39	1.812	2.009	3.375	4.994	1.231	44	32340	44	33660	type comments here
sel.04.3377.wav	sel.05.ch01.141030.140115.98..wav	45	68.6	79.64	2.048	2.106	3.484	4.951	1.31	44	32032	44	33660	type comments here
AVERAGE		47.0526	69.6711	61.6732	1.77295	1.96221	3.40789	5.21116	1.21558	44	32782.3	44	36158.7
3378
sel.02.3378.wav	sel.01.ch01.141030.140305.47..wav	18	76.6	80.02	1.092	1.9	5.184	3.269	0.914	44	33088	44	43428	type comments here
sel.03.3378.wav	sel.01.ch01.141030.140305.47..wav	24	79.09	76.87	1.177	1.776	5.399	3.109	1.064	44	38104	44	43428	type comments here
sel.04.3378.wav	sel.01.ch01.141030.140305.47..wav	24	75.49	72.02	1.12	1.683	4.978	2.977	1.035	44	38104	44	43428	type comments here
sel.05.3378.wav	sel.01.ch01.141030.140305.47..wav	22	74.78	76.62	1.132	1.807	5.249	2.966	1.029	44	37312	44	43428	type comments here
sel.01.3378.wav	sel.02.ch01.141030.140306.52..wav	26	79.46	73.44	1.072	1.567	4.309	3.311	1.124	44	36168	44	38544	type comments here
sel.02.3378.wav	sel.02.ch01.141030.140306.52..wav	23	73.23	76.03	1.125	1.7	4.643	3.581	0.891	44	33088	44	38544	type comments here
sel.03.3378.wav	sel.02.ch01.141030.140306.52..wav	25	75.46	73.87	1.218	1.597	4.828	3.467	1.039	44	38104	44	38544	type comments here
sel.04.3378.wav	sel.02.ch01.141030.140306.52..wav	22	72.46	80.34	1.156	1.509	4.471	3.335	1.009	44	38104	44	38544	type comments here
sel.05.3378.wav	sel.02.ch01.141030.140306.52..wav	25	77.74	73.31	1.166	1.621	4.701	3.322	1.005	44	37312	44	38544	type comments here
sel.01.3378.wav	sel.03.ch01.141030.140308.15..wav	26	77.57	80.51	1.317	1.847	4.282	3.148	1.266	44	36168	44	35288	type comments here
sel.02.3378.wav	sel.03.ch01.141030.140308.15..wav	25	73.27	77.89	1.376	2.035	4.591	3.438	1.026	44	33088	44	35288	type comments here
sel.03.3378.wav	sel.03.ch01.141030.140308.15..wav	25	77.11	78.95	1.498	1.894	4.737	3.316	1.173	44	38104	44	35288	type comments here
sel.04.3378.wav	sel.03.ch01.141030.140308.15..wav	24	78.73	81.27	1.422	1.802	4.448	3.171	1.149	44	38104	44	35288	type comments here
sel.05.3378.wav	sel.03.ch01.141030.140308.15..wav	25	73.5	78.74	1.434	1.94	4.639	3.153	1.144	44	37312	44	35288	type comments here
sel.01.3378.wav	sel.04.ch01.141030.140309.66..wav	25	80.63	79.78	1.328	1.694	4.016	3.246	1.213	44	36168	44	33836	type comments here
sel.02.3378.wav	sel.04.ch01.141030.140309.66..wav	24	74	79.49	1.384	1.853	4.31	3.549	0.98	44	33088	44	33836	type comments here
sel.03.3378.wav	sel.04.ch01.141030.140309.66..wav	24	75.87	80.34	1.496	1.73	4.431	3.371	1.127	44	38104	44	33836	type comments here
sel.04.3378.wav	sel.04.ch01.141030.140309.66..wav	24	77.57	76.64	1.428	1.647	4.186	3.24	1.098	44	38104	44	33836	type comments here
sel.05.3378.wav	sel.04.ch01.141030.140309.66..wav	29	73.84	70.95	1.437	1.771	4.352	3.225	1.094	44	37312	44	33836	type comments here
sel.01.3378.wav	sel.05.ch01.141030.140310.99..wav	31	75.56	65.65	1.178	1.592	4.009	3.055	1.174	44	36168	44	29788	type comments here
sel.02.3378.wav	sel.05.ch01.141030.140310.99..wav	24	77.95	73.63	1.233	1.71	4.338	3.35	0.931	44	33088	44	29788	type comments here
sel.03.3378.wav	sel.05.ch01.141030.140310.99..wav	30	76.87	65.54	1.346	1.607	4.49	3.19	1.083	44	38104	44	29788	type comments here
sel.04.3378.wav	sel.05.ch01.141030.140310.99..wav	25	82.02	75.95	1.278	1.536	4.173	3.057	1.057	44	38104	44	29788	type comments here
sel.05.3378.wav	sel.05.ch01.141030.140310.99..wav	30	76.15	79.69	1.287	1.649	4.376	3.044	1.052	44	37312	44	29788	type comments here
AVERAGE		25	76.4562	76.1475	1.27917	1.72779	4.5475	3.24542	1.06987	44	36571.3	44	35874.7
sel.02.3380.wav	sel.01.ch01.141030.140551.24..wav	51	66.65	46.27	1.352	1.622	2.847	5.192	1.133	44	37884	44	50248	type comments here
sel.03.3380.wav	sel.01.ch01.141030.140551.24..wav	65	69.41	75.2	1.147	1.646	2.625	5.062	1.156	44	32692	44	50248	type comments here
sel.04.3380.wav	sel.01.ch01.141030.140551.24..wav	67	68.18	36.13	1.201	1.481	2.507	4.774	1.147	44	36696	44	50248	type comments here
sel.05.3380.wav	sel.01.ch01.141030.140551.24..wav	70	67.04	70.14	1.406	1.65	2.427	5.069	1.151	44	31064	44	50248	type comments here
sel.01.3380.wav	sel.02.ch01.141030.140552.52..wav	63	68.65	53.3	1.318	1.575	2.941	4.247	1.14	44	38676	44	53328	type comments here
sel.02.3380.wav	sel.02.ch01.141030.140552.52..wav	64	65.79	56.97	1.384	1.665	3.126	4.416	1.141	44	37884	44	53328	type comments here
sel.03.3380.wav	sel.02.ch01.141030.140552.52..wav	70	71.47	65.76	1.181	1.692	2.901	4.386	1.169	44	32692	44	53328	type comments here
sel.04.3380.wav	sel.02.ch01.141030.140552.52..wav	67	68.92	55.58	1.226	1.522	2.746	4.1	1.159	44	36696	44	53328	type comments here
sel.05.3380.wav	sel.02.ch01.141030.140552.52..wav	68	71.98	73.04	1.427	1.697	2.668	4.398	1.162	44	31064	44	53328	type comments here
sel.01.3380.wav	sel.03.ch01.141030.140555.36..wav	62	71.98	33.94	1.45	1.382	2.428	2.774	1.157	44	38676	44	39512	type comments here
sel.02.3380.wav	sel.03.ch01.141030.140555.36..wav	61	71	43.25	1.522	1.473	2.571	2.891	1.159	44	37884	44	39512	type comments here
sel.03.3380.wav	sel.03.ch01.141030.140555.36..wav	67	68.48	6.199	1.319	1.493	2.352	3.112	1.184	44	32692	44	39512	type comments here
sel.04.3380.wav	sel.03.ch01.141030.140555.36..wav	70	72.71	24.84	1.368	1.355	2.269	2.792	1.177	44	36696	44	39512	type comments here
sel.05.3380.wav	sel.03.ch01.141030.140555.36..wav	72	68.11	21.98	1.569	1.487	2.193	3.157	1.178	44	31064	44	39512	type comments here
sel.01.3380.wav	sel.04.ch01.141030.140556.68..wav	57	68.8	21.18	1.746	1.71	2.741	3.255	1.143	44	38676	44	42768	type comments here
sel.02.3380.wav	sel.04.ch01.141030.140556.68..wav	60	70.3	31.62	1.787	1.797	2.864	3.383	1.147	44	37884	44	42768	type comments here
sel.03.3380.wav	sel.04.ch01.141030.140556.68..wav	67	71.15	61.72	1.587	1.826	2.65	3.52	1.172	44	32692	44	42768	type comments here
sel.04.3380.wav	sel.04.ch01.141030.140556.68..wav	69	73.6	44.77	1.593	1.659	2.602	3.202	1.163	44	36696	44	42768	type comments here
sel.05.3380.wav	sel.04.ch01.141030.140556.68..wav	72	71.91	81.96	1.792	1.83	2.52	3.545	1.166	44	31064	44	42768	type comments here
sel.01.3380.wav	sel.05.ch01.141030.140559.36..wav	54	62.79	79.72	1.517	1.49	2.397	4.56	1.016	44	38676	44	30404	type comments here
sel.02.3380.wav	sel.05.ch01.141030.140559.36..wav	46	66.17	64.41	1.585	1.571	2.536	4.735	1.018	44	37884	44	30404	type comments here
sel.03.3380.wav	sel.05.ch01.141030.140559.36..wav	57	67.88	64.69	1.38	1.589	2.318	4.643	1.045	44	32692	44	30404	type comments here
sel.04.3380.wav	sel.05.ch01.141030.140559.36..wav	57	65.36	89.19	1.426	1.475	2.243	4.342	1.038	44	36696	44	30404	type comments here
sel.05.3380.wav	sel.05.ch01.141030.140559.36..wav	68	69.21	58.01	1.629	1.586	2.162	4.646	1.037	44	31064	44	30404	type comments here
AVERAGE		63.5	69.0642	52.4945	1.45467	1.59471	2.56808	4.00838	1.13158	44	35266	44	42960.5
3381sel.02.3381.wav	sel.01.ch01.141030.140832.05..wav	14	79.94	93.85	0.637	1.594	1.803	4.315	1.157	44	47300	44	45540	type comments here
sel.03.3381.wav	sel.01.ch01.141030.140832.05..wav	15	83.93	93.45	0.7	1.652	2.16	4.288	1.182	44	43076	44	45540	type comments here
sel.04.3381.wav	sel.01.ch01.141030.140832.05..wav	15	78.47	81.81	0.636	1.588	1.583	4.362	1.18	44	41668	44	45540	type comments here
sel.05.3381.wav	sel.01.ch01.141030.140832.05..wav	15	79.01	86.5	0.676	1.514	2.084	4.852	1.267	44	43076	44	45540	type comments here
sel.01.3381.wav	sel.02.ch01.141030.140835.83..wav	37	71.46	67.34	0.653	1.643	1.928	4.931	1.194	44	42724	44	43120	type comments here
sel.02.3381.wav	sel.02.ch01.141030.140835.83..wav	32	64.04	73.18	0.664	1.667	1.874	4.967	1.138	44	47300	44	43120	type comments here
sel.03.3381.wav	sel.02.ch01.141030.140835.83..wav	38	58.8	77.09	0.729	1.709	2.232	5.009	1.164	44	43076	44	43120	type comments here
sel.04.3381.wav	sel.02.ch01.141030.140835.83..wav	35	67.32	69.13	0.662	1.654	1.657	5.051	1.158	44	41668	44	43120	type comments here
sel.05.3381.wav	sel.02.ch01.141030.140835.83..wav	31	72.71	70.75	0.705	1.573	2.157	5.55	1.248	44	43076	44	43120	type comments here
sel.01.3381.wav	sel.03.ch01.141030.140840.17..wav	12	82.81	85.36	0.633	1.33	2.145	4.366	1.169	44	42724	44	49940	type comments here
sel.02.3381.wav	sel.03.ch01.141030.140840.17..wav	11	82.58	94.59	0.642	1.356	2.117	4.389	1.117	44	47300	44	49940	type comments here
sel.03.3381.wav	sel.03.ch01.141030.140840.17..wav	12	84.24	93.86	0.706	1.394	2.493	4.369	1.147	44	43076	44	49940	type comments here
sel.04.3381.wav	sel.03.ch01.141030.140840.17..wav	13	82.63	87.31	0.642	1.342	1.767	4.447	1.141	44	41668	44	49940	type comments here
sel.05.3381.wav	sel.03.ch01.141030.140840.17..wav	12	81.32	87.73	0.682	1.257	2.346	4.93	1.228	44	43076	44	49940	type comments here
sel.01.3381.wav	sel.04.ch01.141030.140843.38..wav	25	81.1	78.76	0.749	1.561	1.778	3.838	1.129	44	42724	44	44572	type comments here
sel.02.3381.wav	sel.04.ch01.141030.140843.38..wav	23	81.72	80.81	0.76	1.583	1.691	3.87	1.076	44	47300	44	44572	type comments here
sel.03.3381.wav	sel.04.ch01.141030.140843.38..wav	25	79.51	78.93	0.826	1.595	2.019	3.846	1.103	44	43076	44	44572	type comments here
sel.04.3381.wav	sel.04.ch01.141030.140843.38..wav	26	77.31	78.22	0.758	1.563	1.674	3.914	1.102	44	41668	44	44572	type comments here
sel.05.3381.wav	sel.04.ch01.141030.140843.38..wav	25	79.44	78.93	0.806	1.49	2.042	4.411	1.191	44	43076	44	44572	type comments here
sel.01.3381.wav	sel.05.ch01.141030.140844.80..wav	15	80.26	92.98	0.644	1.424	1.851	5.054	1.176	44	42724	44	37752	type comments here
sel.02.3381.wav	sel.05.ch01.141030.140844.80..wav	14	82.02	93.66	0.654	1.452	1.81	5.099	1.126	44	47300	44	37752	type comments here
sel.03.3381.wav	sel.05.ch01.141030.140844.80..wav	15	80.11	93.04	0.719	1.495	2.169	5.11	1.148	44	43076	44	37752	type comments here
sel.04.3381.wav	sel.05.ch01.141030.140844.80..wav	16	77.96	80.76	0.653	1.424	1.556	5.174	1.144	44	41668	44	37752	type comments here
sel.05.3381.wav	sel.05.ch01.141030.140844.80..wav	15	77.84	93.25	0.696	1.349	2.072	5.658	1.232	44	43076	44	37752	type comments here
AVERAGE		20.4583	77.7721	83.8037	0.693	1.50871	1.95867	4.65833	1.16321	44	43604	44	44128.3
Sound 1	Sound 2	%Similarity	Accuracy	%Sequential	Pitch diff	FM diff	Entropy diff	Goodness diff	AM diff	From(1)	To(1)	From(2)	To(2)	Comments
sel.02.3254.wav	sel.01.ch01.141030.132903.37..wav	64	74.89	35.92	0.767	1.89	2.41	3.154	1.389	44	29436	44	33044	type comments here
sel.03.3254.wav	sel.01.ch01.141030.132903.37..wav	60	77.74	59.58	0.764	1.895	2.217	3.436	1.326	44	29436	44	33044	type comments here
sel.04.3254.wav	sel.01.ch01.141030.132903.37..wav	60	74.85	57.32	0.665	1.842	2.526	3.248	1.357	44	30360	44	33044	type comments here
sel.05.3254.wav	sel.01.ch01.141030.132903.37..wav	46	75.24	65.06	0.805	1.921	2.066	3.377	1.377	44	28512	44	33044	type comments here
sel.01.3254.wav	sel.02.ch01.141030.132904.91..wav	83	72.31	90.92	0.906	1.993	1.944	4.01	1.645	44	29128	44	41624	type comments here
sel.02.3254.wav	sel.02.ch01.141030.132904.91..wav	81	77.13	81.43	0.887	1.968	2.018	3.807	1.633	44	29436	44	41624	type comments here
sel.03.3254.wav	sel.02.ch01.141030.132904.91..wav	77	77.21	46.1	0.89	1.975	1.891	4.067	1.569	44	29436	44	41624	type comments here
sel.04.3254.wav	sel.02.ch01.141030.132904.91..wav	80	76.82	88.38	0.785	1.927	2.124	3.901	1.599	44	30360	44	41624	type comments here
sel.05.3254.wav	sel.02.ch01.141030.132904.91..wav	79	77.62	88.87	0.924	1.992	1.858	4.032	1.617	44	28512	44	41624	type comments here
sel.01.3254.wav	sel.03.ch01.141030.132906.80..wav	88	74.25	100	0.816	2.046	1.679	3.424	1.48	44	29128	44	32868	type comments here
sel.02.3254.wav	sel.03.ch01.141030.132906.80..wav	87	76.19	100	0.797	2.018	1.636	3.239	1.47	44	29436	44	32868	type comments here
sel.03.3254.wav	sel.03.ch01.141030.132906.80..wav	91	74.43	100	0.79	2.014	1.615	3.51	1.407	44	29436	44	32868	type comments here
sel.04.3254.wav	sel.03.ch01.141030.132906.80..wav	83	76.07	100	0.69	1.96	1.728	3.334	1.435	44	30360	44	32868	type comments here
sel.05.3254.wav	sel.03.ch01.141030.132906.80..wav	88	72.77	87.63	0.834	2.06	1.772	3.462	1.455	44	28512	44	32868	type comments here
sel.01.3254.wav	sel.04.ch01.141030.132908.21..wav	85	75.37	84.26	0.946	2.026	1.512	3.647	1.543	44	29128	44	39028	type comments here
sel.02.3254.wav	sel.04.ch01.141030.132908.21..wav	85	77.49	80.23	0.931	1.993	1.473	3.473	1.531	44	29436	44	39028	type comments here
sel.03.3254.wav	sel.04.ch01.141030.132908.21..wav	88	79.4	79.64	0.925	1.999	1.447	3.739	1.468	44	29436	44	39028	type comments here
sel.04.3254.wav	sel.04.ch01.141030.132908.21..wav	86	77.01	100	0.828	1.949	1.561	3.555	1.5	44	30360	44	39028	type comments here
sel.05.3254.wav	sel.04.ch01.141030.132908.21..wav	85	73.84	69.08	0.965	2.037	1.6	3.676	1.514	44	28512	44	39028	type comments here
sel.01.3254.wav	sel.05.ch01.141030.132909.79..wav	74	68.78	66.71	0.909	1.995	1.654	3.52	1.642	44	29128	44	32208	type comments here
sel.02.3254.wav	sel.05.ch01.141030.132909.79..wav	78	70.6	91.61	0.887	1.966	1.667	3.334	1.634	44	29436	44	32208	type comments here
sel.03.3254.wav	sel.05.ch01.141030.132909.79..wav	79	71.66	92.21	0.883	1.973	1.595	3.61	1.572	44	29436	44	32208	type comments here
sel.04.3254.wav	sel.05.ch01.141030.132909.79..wav	76	69.92	90.13	0.784	1.923	1.762	3.429	1.602	44	30360	44	32208	type comments here
sel.05.3254.wav	sel.05.ch01.141030.132909.79..wav	81	71.07	100	0.919	1.999	1.664	3.553	1.62	44	28512	44	32208	type comments here
AVERAGE		78.5	74.6942	81.4617	0.845708	1.97337	1.80912	3.56404	1.51604	44	29384.7	44	35867.3
Sound 1	Sound 2	%Similarity	Accuracy	%Sequential	Pitch diff	FM diff	Entropy diff	Goodness diff	AM diff	From(1)	To(1)	From(2)	To(2)	Comments
sel.02.3253.wav	sel.01.ch01.141030.132533.71..wav	67	69.25	91.39	0.998	1.503	1.61	4.749	1.397	44	26884	44	38236	type comments here
sel.03.3253.wav	sel.01.ch01.141030.132533.71..wav	72	63.97	14.18	0.99	1.444	1.657	4.214	1.419	44	26092	44	38236	type comments here
sel.04.3253.wav	sel.01.ch01.141030.132533.71..wav	71	67.19	44.58	1.015	1.457	1.731	4.602	1.357	44	27676	44	38236	type comments here
sel.05.3253.wav	sel.01.ch01.141030.132533.71..wav	70	64.84	69.98	1.013	1.441	1.653	4.282	1.345	44	29656	44	38236	type comments here
sel.01.3253.wav	sel.02.ch01.141030.132537.19..wav	85	70.48	41.43	1.016	1.418	1.157	3.997	1.227	44	26488	44	40656	type comments here
sel.02.3253.wav	sel.02.ch01.141030.132537.19..wav	80	68.71	78.36	0.892	1.4	1.102	4.055	1.28	44	26884	44	40656	type comments here
sel.03.3253.wav	sel.02.ch01.141030.132537.19..wav	85	67.75	42.9	0.885	1.333	1.111	3.519	1.297	44	26092	44	40656	type comments here
sel.04.3253.wav	sel.02.ch01.141030.132537.19..wav	82	70.54	29.61	0.914	1.354	1.211	3.869	1.24	44	27676	44	40656	type comments here
sel.05.3253.wav	sel.02.ch01.141030.132537.19..wav	80	70.78	68.79	0.908	1.34	1.132	3.554	1.221	44	29656	44	40656	type comments here
sel.01.3253.wav	sel.03.ch01.141030.132538.33..wav	94	74.06	53.07	0.999	1.468	1.49	3.867	1.357	44	26488	44	38236	type comments here
sel.02.3253.wav	sel.03.ch01.141030.132538.33..wav	88	71.15	70.81	0.864	1.454	1.393	3.918	1.417	44	26884	44	38236	type comments here
sel.03.3253.wav	sel.03.ch01.141030.132538.33..wav	86	70.13	67.9	0.85	1.443	1.686	3.381	1.432	44	26092	44	38236	type comments here
sel.04.3253.wav	sel.03.ch01.141030.132538.33..wav	83	72.05	39.17	0.888	1.42	1.588	3.772	1.371	44	27676	44	38236	type comments here
sel.05.3253.wav	sel.03.ch01.141030.132538.33..wav	88	70.45	64.63	0.879	1.383	1.505	3.439	1.356	44	29656	44	38236	type comments here
sel.01.3253.wav	sel.04.ch01.141030.132540.33..wav	74	72.12	44.75	0.95	1.325	1.307	3.694	1.25	44	26488	44	37400	type comments here
sel.02.3253.wav	sel.04.ch01.141030.132540.33..wav	70	72.76	29.5	0.818	1.32	1.232	3.755	1.307	44	26884	44	37400	type comments here
sel.03.3253.wav	sel.04.ch01.141030.132540.33..wav	85	69.27	42.22	0.812	1.354	1.366	3.197	1.319	44	26092	44	37400	type comments here
sel.04.3253.wav	sel.04.ch01.141030.132540.33..wav	87	67.35	91.71	0.843	1.292	1.38	3.586	1.26	44	27676	44	37400	type comments here
sel.05.3253.wav	sel.04.ch01.141030.132540.33..wav	78	70.17	58.39	0.838	1.237	1.3	3.27	1.248	44	29656	44	37400	type comments here
sel.01.3253.wav	sel.05.ch01.141030.132541.26..wav	80	68.26	100	0.967	1.452	1.394	3.364	1.366	44	26488	44	35640	type comments here
sel.02.3253.wav	sel.05.ch01.141030.132541.26..wav	82	67.37	100	0.835	1.445	1.303	3.365	1.414	44	26884	44	35640	type comments here
sel.03.3253.wav	sel.05.ch01.141030.132541.26..wav	87	68.27	83.1	0.814	1.433	1.541	2.805	1.429	44	26092	44	35640	type comments here
sel.04.3253.wav	sel.05.ch01.141030.132541.26..wav	82	68.17	100	0.864	1.409	1.485	3.259	1.368	44	27676	44	35640	type comments here
sel.05.3253.wav	sel.05.ch01.141030.132541.26..wav	76	72.65	100	0.852	1.369	1.405	2.951	1.364	44	29656	44	35640	type comments here
AVERAGE		80.5	69.4892	63.6029	0.904333	1.39558	1.40579	3.686	1.33504	44	27395.5	44	38025.2
Sound 1	Sound 2	%Similarity	Accuracy	%Sequential	Pitch diff	FM diff	Entropy diff	Goodness diff	AM diff	From(1)	To(1)	From(2)	To(2)	Comments
sel.01.ch01.141031.115821.67..wav	sel.01.ch01.141030.131043.85..wav	59	72.92	25.43	0.964	1.878	2.05	5.683	1.543	44	69080	44	74624	type comments here
sel.02.ch01.141031.115824.61..wav	sel.01.ch01.141030.131043.85..wav	55	74.16	42.36	1.089	1.939	2.293	6.091	1.517	44	50336	44	74624	type comments here
sel.03.ch01.141031.115826.59..wav	sel.01.ch01.141030.131043.85..wav	65	77.2	57.86	0.864	1.826	1.634	5.212	1.498	44	29700	44	74624	type comments here
sel.04.ch01.141031.115829.20..wav	sel.01.ch01.141030.131043.85..wav	55	74.66	30.62	0.971	1.899	2.588	6.494	1.523	44	50908	44	74624	type comments here
sel.01.ch01.141031.115337.09..wav	sel.02.ch01.141030.131046.00..wav	78	70.66	57.33	1.011	1.838	1.577	3.345	1.35	44	58784	44	77220	type comments here
sel.01.ch01.141031.115821.67..wav	sel.02.ch01.141030.131046.00..wav	52	69.72	56.66	1.24	1.821	2.256	3.845	1.291	44	69080	44	77220	type comments here
sel.02.ch01.141031.115824.61..wav	sel.02.ch01.141030.131046.00..wav	52	70.93	49.43	1.35	1.867	2.555	4.354	1.263	44	50336	44	77220	type comments here
sel.03.ch01.141031.115826.59..wav	sel.02.ch01.141030.131046.00..wav	77	69.13	29.67	1.11	1.748	1.775	3.916	1.242	44	29700	44	77220	type comments here
sel.04.ch01.141031.115829.20..wav	sel.02.ch01.141030.131046.00..wav	48	71.69	61.36	1.277	1.844	2.805	4.662	1.27	44	50908	44	77220	type comments here
sel.01.ch01.141031.115337.09..wav	sel.03.ch01.141030.131052.90..wav	68	69.29	52.1	0.871	2.007	2.045	4.309	1.595	44	58784	44	52052	type comments here
sel.01.ch01.141031.115821.67..wav	sel.03.ch01.141030.131052.90..wav	50	66.13	37.85	1.153	1.998	2.778	5.395	1.533	44	69080	44	52052	type comments here
sel.02.ch01.141031.115824.61..wav	sel.03.ch01.141030.131052.90..wav	46	72.92	70.6	1.256	2.043	3.099	5.812	1.507	44	50336	44	52052	type comments here
sel.03.ch01.141031.115826.59..wav	sel.03.ch01.141030.131052.90..wav	52	73.81	76.85	1.007	1.925	2.267	4.952	1.486	44	29700	44	52052	type comments here
sel.04.ch01.141031.115829.20..wav	sel.03.ch01.141030.131052.90..wav	40	73.38	62.97	1.207	2.019	3.332	6.209	1.512	44	50908	44	52052	type comments here
sel.01.ch01.141031.115337.09..wav	sel.04.ch01.141030.131056.33..wav	79	72.48	30.84	0.928	2.096	1.812	3.927	1.586	44	58784	44	57552	type comments here
sel.01.ch01.141031.115821.67..wav	sel.04.ch01.141030.131056.33..wav	56	74.91	46.59	1.194	1.989	2.248	5.05	1.527	44	69080	44	57552	type comments here
sel.02.ch01.141031.115824.61..wav	sel.04.ch01.141030.131056.33..wav	57	76	40.15	1.298	2.052	2.44	5.469	1.498	44	50336	44	57552	type comments here
sel.03.ch01.141031.115826.59..wav	sel.04.ch01.141030.131056.33..wav	67	74.85	12.75	1.052	1.937	1.891	4.583	1.476	44	29700	44	57552	type comments here
sel.04.ch01.141031.115829.20..wav	sel.04.ch01.141030.131056.33..wav	50	75.04	51.03	1.243	2.014	2.778	5.859	1.506	44	50908	44	57552	type comments here
sel.01.ch01.141031.115337.09..wav	sel.05.ch01.141030.131100.12..wav	80	70.95	64.54	0.864	2.063	1.641	4.278	1.705	44	58784	44	55924	type comments here
sel.01.ch01.141031.115821.67..wav	sel.05.ch01.141030.131100.12..wav	58	72.87	37.26	1.056	1.985	2.016	5.236	1.638	44	69080	44	55924	type comments here
sel.02.ch01.141031.115824.61..wav	sel.05.ch01.141030.131100.12..wav	61	74.91	46.98	1.171	2.044	2.181	5.672	1.615	44	50336	44	55924	type comments here
sel.03.ch01.141031.115826.59..wav	sel.05.ch01.141030.131100.12..wav	80	74.28	30.56	0.936	1.934	1.692	4.915	1.598	44	29700	44	55924	type comments here
sel.04.ch01.141031.115829.20..wav	sel.05.ch01.141030.131100.12..wav	59	76.25	37.37	1.079	2.006	2.54	6.046	1.618	44	50908	44	55924	type comments here
AVERAGE		60.1667	72.8808	46.215	1.09129	1.94883	2.26221	5.05475	1.49571	44	51469	44	63009.8
Sound 1	Sound 2	%Similarity	Accuracy	%Sequential	Pitch diff	FM diff	Entropy diff	Goodness diff	AM diff	From(1)	To(1)	From(2)	To(2)	Comments
sel.02.3248.wav	sel.01.ch01.141030.130819.39..wav	84	79.72	70.6	1.057	1.622	1.199	5.055	1.219	44	24596	44	60808	type comments here
sel.03.3248.wav	sel.01.ch01.141030.130819.39..wav	77	74.67	87.52	1.116	1.596	1.075	5.758	1.102	44	26136	44	60808	type comments here
sel.04.3248.wav	sel.01.ch01.141030.130819.39..wav	65	80.53	67.11	1.107	1.594	1.213	6.542	1.11	44	32692	44	60808	type comments here
sel.05.3248.wav	sel.01.ch01.141030.130819.39..wav	72	78.22	74.89	0.963	1.442	1.143	5.228	1.129	44	32296	44	60808	type comments here
sel.01.3248.wav	sel.02.ch01.141030.130834.00..wav	77	72.95	64.5	0.707	1.573	1.275	5.927	1.088	44	28864	44	47828	type comments here
sel.02.3248.wav	sel.02.ch01.141030.130834.00..wav	92	70.33	53.04	0.727	1.558	1.269	4.799	1.13	44	24596	44	47828	type comments here
sel.03.3248.wav	sel.02.ch01.141030.130834.00..wav	93	68.63	47.04	0.798	1.532	1.125	5.421	1.027	44	26136	44	47828	type comments here
sel.04.3248.wav	sel.02.ch01.141030.130834.00..wav	74	75.17	43.12	0.76	1.523	1.28	6.211	1.02	44	32692	44	47828	type comments here
sel.05.3248.wav	sel.02.ch01.141030.130834.00..wav	85	72.18	54.97	0.608	1.376	1.222	5.044	1.042	44	32296	44	47828	type comments here
sel.01.3248.wav	sel.03.ch01.141030.130835.93..wav	85	68.47	31.6	0.857	1.482	1.159	6.704	0.986	44	28864	44	47168	type comments here
sel.02.3248.wav	sel.03.ch01.141030.130835.93..wav	92	72.86	30.46	0.893	1.508	1.148	5.573	1.027	44	24596	44	47168	type comments here
sel.03.3248.wav	sel.03.ch01.141030.130835.93..wav	85	71.4	36.59	0.975	1.475	1.011	6.182	0.914	44	26136	44	47168	type comments here
sel.04.3248.wav	sel.03.ch01.141030.130835.93..wav	86	72.8	32.07	0.912	1.358	1.161	6.984	0.919	44	32692	44	47168	type comments here
sel.05.3248.wav	sel.03.ch01.141030.130835.93..wav	74	71.33	61.8	0.752	1.277	1.094	5.808	0.937	44	32296	44	47168	type comments here
sel.01.3248.wav	sel.04.ch01.141030.130838.91..wav	81	67.37	49.61	0.732	1.544	1.2	5.763	0.968	44	28864	44	39864	type comments here
sel.02.3248.wav	sel.04.ch01.141030.130838.91..wav	96	68.03	50.17	0.732	1.543	1.193	4.673	1.009	44	24596	44	39864	type comments here
sel.03.3248.wav	sel.04.ch01.141030.130838.91..wav	88	67.59	50.08	0.787	1.511	1.05	5.282	0.9	44	26136	44	39864	type comments here
sel.04.3248.wav	sel.04.ch01.141030.130838.91..wav	74	72.34	66.84	0.785	1.47	1.204	6.041	0.901	44	32692	44	39864	type comments here
sel.05.3248.wav	sel.04.ch01.141030.130838.91..wav	84	71.51	62.89	0.648	1.346	1.15	4.897	0.921	44	32296	44	39864	type comments here
sel.01.3248.wav	sel.05.ch01.141030.130842.41..wav	73	69.95	78.62	0.745	1.501	1.28	5.85	0.95	44	28864	44	41976	type comments here
sel.02.3248.wav	sel.05.ch01.141030.130842.41..wav	85	72.42	75.26	0.751	1.497	1.285	4.609	0.992	44	24596	44	41976	type comments here
sel.03.3248.wav	sel.05.ch01.141030.130842.41..wav	83	69.45	56.15	0.81	1.469	1.115	5.268	0.881	44	26136	44	41976	type comments here
sel.04.3248.wav	sel.05.ch01.141030.130842.41..wav	67	68.73	65.76	0.8	1.434	1.292	6.087	0.882	44	32692	44	41976	type comments here
sel.05.3248.wav	sel.05.ch01.141030.130842.41..wav	72	72.26	63.98	0.655	1.303	1.243	4.795	0.906	44	32296	44	41976	type comments here
AVERAGE		81	72.0379	57.2779	0.819875	1.48058	1.18275	5.60421	0.998333	44	28919	44	46975.5
Sound 1	Sound 2	%Similarity	Accuracy	%Sequential	Pitch diff	FM diff	Entropy diff	Goodness diff	AM diff	From(1)	To(1)	From(2)	To(2)	Comments
sel.02.3246.wav	sel.01.ch01.141030.130444.20..wav	27	66.24	79.1	1.905	1.812	3.419	3.454	1.649	44	50160	44	33176	type comments here
sel.03.3246.wav	sel.01.ch01.141030.130444.20..wav	27	65.61	68.12	1.893	1.682	3.618	3.485	1.799	44	50952	44	33176	type comments here
sel.04.3246.wav	sel.01.ch01.141030.130444.20..wav	30	64.99	81.44	1.924	1.908	3.487	3.649	1.792	44	51744	44	33176	type comments here
sel.05.3246.wav	sel.01.ch01.141030.130444.20..wav	18	65.04	79.74	1.891	1.874	3.849	3.69	1.829	44	52184	44	33176	type comments here
sel.01.3246.wav	sel.02.ch01.141030.130445.02..wav	33	65.82	80.07	1.965	1.522	3.381	3.304	1.798	44	62700	44	33176	type comments here
sel.02.3246.wav	sel.02.ch01.141030.130445.02..wav	29	63.31	75.06	2.016	1.556	3.233	3.23	1.685	44	50160	44	33176	type comments here
sel.03.3246.wav	sel.02.ch01.141030.130445.02..wav	26	67.32	75.05	2.006	1.446	3.432	3.259	1.832	44	50952	44	33176	type comments here
sel.04.3246.wav	sel.02.ch01.141030.130445.02..wav	30	64.24	71.57	2.054	1.673	3.316	3.437	1.825	44	51744	44	33176	type comments here
sel.05.3246.wav	sel.02.ch01.141030.130445.02..wav	22	66.26	75.86	2.016	1.661	3.677	3.456	1.864	44	52184	44	33176	type comments here
sel.01.3246.wav	sel.03.ch01.141030.130446.23..wav	40	66.2	65.44	1.687	1.58	2.691	2.549	1.685	44	62700	44	44572	type comments here
sel.02.3246.wav	sel.03.ch01.141030.130446.23..wav	35	67.63	61.36	1.731	1.639	2.56	2.597	1.569	44	50160	44	44572	type comments here
sel.03.3246.wav	sel.03.ch01.141030.130446.23..wav	33	66.3	58.34	1.719	1.518	2.762	2.606	1.719	44	50952	44	44572	type comments here
sel.04.3246.wav	sel.03.ch01.141030.130446.23..wav	35	65.88	66.81	1.777	1.745	2.597	2.885	1.714	44	51744	44	44572	type comments here
sel.05.3246.wav	sel.03.ch01.141030.130446.23..wav	26	67.94	73.5	1.737	1.729	2.961	2.762	1.75	44	52184	44	44572	type comments here
sel.01.3246.wav	sel.04.ch01.141030.130447.87..wav	38	68.96	81.58	1.603	1.645	3.647	3.8	1.732	44	62700	44	51392	type comments here
sel.02.3246.wav	sel.04.ch01.141030.130447.87..wav	38	68.97	72.08	1.673	1.742	3.491	3.711	1.621	44	50160	44	51392	type comments here
sel.03.3246.wav	sel.04.ch01.141030.130447.87..wav	35	73.18	68.88	1.66	1.617	3.69	3.74	1.768	44	50952	44	51392	type comments here
sel.04.3246.wav	sel.04.ch01.141030.130447.87..wav	37	70.77	67.26	1.697	1.845	3.595	3.903	1.761	44	51744	44	51392	type comments here
sel.05.3246.wav	sel.04.ch01.141030.130447.87..wav	22	70.27	81.43	1.662	1.808	3.953	3.944	1.799	44	52184	44	51392	type comments here
sel.01.3246.wav	sel.06.ch01.141030.130456.76..wav	50	63.98	56.6	1.664	1.628	3.192	2.777	1.882	44	62700	44	64724	type comments here
sel.02.3246.wav	sel.06.ch01.141030.130456.76..wav	29	67.44	71.72	1.692	1.662	3.056	2.778	1.764	44	50160	44	64724	type comments here
sel.03.3246.wav	sel.06.ch01.141030.130456.76..wav	39	67.09	56.26	1.679	1.55	3.255	2.796	1.913	44	50952	44	64724	type comments here
sel.04.3246.wav	sel.06.ch01.141030.130456.76..wav	33	66.34	59.48	1.742	1.779	3.112	3.035	1.908	44	51744	44	64724	type comments here
sel.05.3246.wav	sel.06.ch01.141030.130456.76..wav	26	66.07	69.45	1.706	1.766	3.474	2.964	1.944	44	52184	44	64724	type comments here
AVERAGE		31.5833	66.9104	70.675	1.79579	1.68279	3.31033	3.24213	1.77508	44	53166.7	44	45917.7
Sound 1	Sound 2	%Similarity	Accuracy	%Sequential	Pitch diff	FM diff	Entropy diff	Goodness diff	AM diff	From(1)	To(1)	From(2)	To(2)	Comments
sel.02.ch01.141030.132053.55..wav	sel.01.ch01.141030.132241.76..wav	59	72.42	43.59	1.538	1.603	2.569	3.418	1.234	44	45804	44	54824	type comments here
sel.03.ch01.141030.132055.21..wav	sel.01.ch01.141030.132241.76..wav	59	73.6	52.1	1.47	1.604	2.497	3.286	1.218	44	47652	44	54824	type comments here
sel.04.ch01.141030.132102.89..wav	sel.01.ch01.141030.132241.76..wav	56	71.04	50.73	1.499	1.531	2.345	3.021	1.243	44	53812	44	54824	type comments here
sel.05.ch01.141030.132104.45..wav	sel.01.ch01.141030.132241.76..wav	53	74.36	47.64	1.602	1.499	2.574	3.354	1.257	44	48620	44	54824	type comments here
sel.01.ch01.141030.132052.03..wav	sel.02.ch01.141030.132243.84..wav	69	72.21	41.95	1.617	1.55	2.325	2.789	1.177	44	59928	44	71368	type comments here
sel.02.ch01.141030.132053.55..wav	sel.02.ch01.141030.132243.84..wav	75	70.96	32.11	1.6	1.593	2.174	2.95	1.218	44	45804	44	71368	type comments here
sel.03.ch01.141030.132055.21..wav	sel.02.ch01.141030.132243.84..wav	77	71.19	24.02	1.531	1.567	2.057	2.801	1.203	44	47652	44	71368	type comments here
sel.04.ch01.141030.132102.89..wav	sel.02.ch01.141030.132243.84..wav	74	71.29	54.82	1.559	1.521	2.032	2.476	1.226	44	53812	44	71368	type comments here
sel.05.ch01.141030.132104.45..wav	sel.02.ch01.141030.132243.84..wav	75	72.37	26.84	1.659	1.432	2.148	2.808	1.243	44	48620	44	71368	type comments here
sel.01.ch01.141030.132052.03..wav	sel.03.ch01.141030.132245.93..wav	54	66.96	28.72	1.497	1.627	2.833	2.881	1.318	44	59928	44	53328	type comments here
sel.02.ch01.141030.132053.55..wav	sel.03.ch01.141030.132245.93..wav	62	69.89	37.3	1.431	1.643	2.703	2.941	1.354	44	45804	44	53328	type comments here
sel.03.ch01.141030.132055.21..wav	sel.03.ch01.141030.132245.93..wav	59	69.75	38.63	1.385	1.655	2.644	2.795	1.341	44	47652	44	53328	type comments here
sel.04.ch01.141030.132102.89..wav	sel.03.ch01.141030.132245.93..wav	60	69.58	29.33	1.43	1.567	2.447	2.512	1.364	44	53812	44	53328	type comments here
sel.05.ch01.141030.132104.45..wav	sel.03.ch01.141030.132245.93..wav	56	70.52	50.21	1.52	1.571	2.712	2.855	1.38	44	48620	44	53328	type comments here
sel.01.ch01.141030.132052.03..wav	sel.04.ch01.141030.132248.41..wav	61	72.18	66.08	1.588	1.712	2.741	3.175	1.212	44	59928	44	51700	type comments here
sel.02.ch01.141030.132053.55..wav	sel.04.ch01.141030.132248.41..wav	74	71.86	75.79	1.504	1.738	2.597	3.212	1.251	44	45804	44	51700	type comments here
sel.03.ch01.141030.132055.21..wav	sel.04.ch01.141030.132248.41..wav	69	72.66	73.19	1.468	1.734	2.508	3.084	1.238	44	47652	44	51700	type comments here
sel.04.ch01.141030.132102.89..wav	sel.04.ch01.141030.132248.41..wav	63	72.28	69.5	1.518	1.664	2.405	2.818	1.262	44	53812	44	51700	type comments here
sel.05.ch01.141030.132104.45..wav	sel.04.ch01.141030.132248.41..wav	65	75.08	68.11	1.606	1.631	2.591	3.155	1.278	44	48620	44	51700	type comments here
sel.01.ch01.141030.132052.03..wav	sel.05.ch01.141030.132249.86..wav	35	68.89	71.78	1.495	1.551	2.711	3.225	1.238	44	59928	44	39864	type comments here
sel.02.ch01.141030.132053.55..wav	sel.05.ch01.141030.132249.86..wav	51	70.4	57.3	1.464	1.589	2.56	3.306	1.274	44	45804	44	39864	type comments here
sel.03.ch01.141030.132055.21..wav	sel.05.ch01.141030.132249.86..wav	52	72.6	50.83	1.399	1.577	2.455	3.145	1.257	44	47652	44	39864	type comments here
sel.04.ch01.141030.132102.89..wav	sel.05.ch01.141030.132249.86..wav	47	67.68	60.72	1.433	1.516	2.401	2.853	1.28	44	53812	44	39864	type comments here
sel.05.ch01.141030.132104.45..wav	sel.05.ch01.141030.132249.86..wav	49	67.27	66.3	1.533	1.457	2.541	3.192	1.295	44	48620	44	39864	type comments here
AVERAGE		60.5833	71.1267	50.7329	1.51442	1.58883	2.48208	3.00217	1.26504	44	50798	44	54191.5
Sound 1	Sound 2	%Similarity	Accuracy	%Sequential	Pitch diff	FM diff	Entropy diff	Goodness diff	AM diff	From(1)	To(1)	From(2)	To(2)	Comments
sel.02.ch01.141031.115006.17..wav	sel.01.ch01.141030.130059.65..wav	57	75.77	61.63	0.646	1.368	1.404	1.795	1.158	44	70224	44	53504	type comments here
sel.03.ch01.141031.115009.20..wav	sel.01.ch01.141030.130059.65..wav	73	69.83	32.53	0.713	1.28	1.419	1.728	1.206	44	50028	44	53504	type comments here
sel.04.ch01.141031.115011.11..wav	sel.01.ch01.141030.130059.65..wav	78	72.2	18.66	0.751	1.222	1.539	1.671	1.207	44	42240	44	53504	type comments here
sel.05.ch01.141031.115014.93..wav	sel.01.ch01.141030.130059.65..wav	59	71.03	45.27	0.683	1.381	1.742	1.705	1.14	44	62436	44	53504	type comments here
sel.01.ch01.141031.114946.17..wav	sel.02.ch01.141030.130105.97..wav	63	76.76	50	0.854	1.352	2.113	2.046	1.22	44	43868	44	48488	type comments here
sel.02.ch01.141031.115006.17..wav	sel.02.ch01.141030.130105.97..wav	53	79.04	35.54	0.72	1.387	1.192	1.715	1.088	44	70224	44	48488	type comments here
sel.03.ch01.141031.115009.20..wav	sel.02.ch01.141030.130105.97..wav	64	74.38	30.98	0.785	1.29	1.21	1.615	1.136	44	50028	44	48488	type comments here
sel.04.ch01.141031.115011.11..wav	sel.02.ch01.141030.130105.97..wav	82	73.95	100	0.819	1.22	1.308	1.558	1.138	44	42240	44	48488	type comments here
sel.05.ch01.141031.115014.93..wav	sel.02.ch01.141030.130105.97..wav	51	75.28	50.35	0.753	1.416	1.508	1.599	1.076	44	62436	44	48488	type comments here
sel.01.ch01.141031.114946.17..wav	sel.03.ch01.141030.130104.88..wav	59	74.19	75.5	0.664	1.239	2.45	2.895	1.303	44	43868	44	45364	type comments here
sel.02.ch01.141031.115006.17..wav	sel.03.ch01.141030.130104.88..wav	40	70.77	60.37	0.589	1.284	1.464	2.403	1.182	44	70224	44	45364	type comments here
sel.03.ch01.141031.115009.20..wav	sel.03.ch01.141030.130104.88..wav	52	66.93	74.82	0.656	1.2	1.48	2.427	1.234	44	50028	44	45364	type comments here
sel.04.ch01.141031.115011.11..wav	sel.03.ch01.141030.130104.88..wav	58	66.52	72.67	0.727	1.135	1.593	2.397	1.219	44	42240	44	45364	type comments here
sel.05.ch01.141031.115014.93..wav	sel.03.ch01.141030.130104.88..wav	42	69.73	51.76	0.628	1.293	1.797	2.385	1.157	44	62436	44	45364	type comments here
sel.01.ch01.141031.114946.17..wav	sel.04.ch01.141030.130107.49..wav	46	73.19	84.93	0.864	1.213	2.295	2.084	1.149	44	43868	44	27676	type comments here
sel.02.ch01.141031.115006.17..wav	sel.04.ch01.141030.130107.49..wav	28	75.5	79.43	0.742	1.257	1.269	1.752	1.006	44	70224	44	27676	type comments here
sel.03.ch01.141031.115009.20..wav	sel.04.ch01.141030.130107.49..wav	41	71.87	85.56	0.808	1.17	1.281	1.653	1.056	44	50028	44	27676	type comments here
sel.04.ch01.141031.115011.11..wav	sel.04.ch01.141030.130107.49..wav	47	74.19	82.89	0.849	1.109	1.405	1.592	1.063	44	42240	44	27676	type comments here
sel.05.ch01.141031.115014.93..wav	sel.04.ch01.141030.130107.49..wav	32	73.7	76.86	0.778	1.28	1.608	1.636	1.002	44	62436	44	27676	type comments here
sel.01.ch01.141031.114946.17..wav	sel.05.ch01.141030.130109.45..wav	51	75.71	58.43	0.853	1.43	3.274	2.177	1.338	44	43868	44	38368	type comments here
sel.02.ch01.141031.115006.17..wav	sel.05.ch01.141030.130109.45..wav	44	72.63	79.18	0.683	1.456	1.974	1.759	1.213	44	70224	44	38368	type comments here
sel.03.ch01.141031.115009.20..wav	sel.05.ch01.141030.130109.45..wav	52	69.68	67.6	0.746	1.342	1.967	1.727	1.257	44	50028	44	38368	type comments here
sel.04.ch01.141031.115011.11..wav	sel.05.ch01.141030.130109.45..wav	70	68.95	100	0.772	1.267	2.156	1.675	1.257	44	42240	44	38368	type comments here
sel.05.ch01.141031.115014.93..wav	sel.05.ch01.141030.130109.45..wav	45	70.03	48.23	0.718	1.49	2.368	1.701	1.197	44	62436	44	38368	type comments here
AVERAGE		53.625	72.5763	63.4663	0.741708	1.29504	1.74233	1.90396	1.16675	44	54171.3	44	42229
Sound 1	Sound 2	%Similarity	Accuracy	%Sequential	Pitch diff	FM diff	Entropy diff	Goodness diff	AM diff	From(1)	To(1)	From(2)	To(2)	Comments
sel.02.ch01.141030.125936.78..wav	sel.01.3242.wav	46	68.33	76.03	1.89	1.765	2.009	2.118	1.795	44	43736	44	34980	type comments here
sel.03.ch01.141030.125938.33..wav	sel.01.3242.wav	54	67.08	86.38	1.812	1.919	3.041	3.015	1.617	44	50248	44	34980	type comments here
sel.04.ch01.141030.125939.54..wav	sel.01.3242.wav	48	68.47	71.78	1.849	1.688	2.238	2.558	1.719	44	56936	44	34980	type comments here
sel.05.ch01.141030.125941.18..wav	sel.01.3242.wav	53	66.1	72.66	2.062	1.835	2.679	2.808	1.804	44	52712	44	34980	type comments here
sel.01.ch01.141030.125932.88..wav	sel.02.3242.wav	43	65.31	60.66	1.759	1.644	2.409	2.403	1.523	44	50732	44	33352	type comments here
sel.02.ch01.141030.125936.78..wav	sel.02.3242.wav	50	68.89	62.47	1.898	1.706	2.058	2.389	1.643	44	43736	44	33352	type comments here
sel.03.ch01.141030.125938.33..wav	sel.02.3242.wav	56	64.67	80.11	1.822	1.86	3.257	3.322	1.461	44	50248	44	33352	type comments here
sel.04.ch01.141030.125939.54..wav	sel.02.3242.wav	52	69.39	59.34	1.858	1.626	2.334	2.833	1.562	44	56936	44	33352	type comments here
sel.05.ch01.141030.125941.18..wav	sel.02.3242.wav	49	63.68	74.48	2.064	1.773	2.801	3.066	1.65	44	52712	44	33352	type comments here
sel.01.ch01.141030.125932.88..wav	sel.03.3242.wav	42	64.07	68.92	1.806	1.614	2.534	2.474	1.549	44	50732	44	34584	type comments here
sel.02.ch01.141030.125936.78..wav	sel.03.3242.wav	37	67.09	83.08	1.951	1.687	2.172	2.452	1.66	44	43736	44	34584	type comments here
sel.03.ch01.141030.125938.33..wav	sel.03.3242.wav	50	66.6	73	1.832	1.758	3.441	3.41	1.478	44	50248	44	34584	type comments here
sel.04.ch01.141030.125939.54..wav	sel.03.3242.wav	42	68.61	73.85	1.907	1.622	2.463	2.916	1.581	44	56936	44	34584	type comments here
sel.05.ch01.141030.125941.18..wav	sel.03.3242.wav	46	63.7	83.84	2.116	1.719	2.945	3.159	1.669	44	52712	44	34584	type comments here
sel.01.ch01.141030.125932.88..wav	sel.04.3242.wav	52	70.25	56.03	1.731	1.709	2.116	3.008	1.543	44	50732	44	54912	type comments here
sel.02.ch01.141030.125936.78..wav	sel.04.3242.wav	45	67.62	63.74	1.921	1.811	1.785	3.002	1.657	44	43736	44	54912	type comments here
sel.03.ch01.141030.125938.33..wav	sel.04.3242.wav	64	65.86	69.67	1.636	1.745	2.879	4.041	1.475	44	50248	44	54912	type comments here
sel.04.ch01.141030.125939.54..wav	sel.04.3242.wav	50	70.42	58.39	1.856	1.754	2.03	3.499	1.578	44	56936	44	54912	type comments here
sel.05.ch01.141030.125941.18..wav	sel.04.3242.wav	59	62.91	64.97	2.075	1.789	2.481	3.755	1.667	44	52712	44	54912	type comments here
sel.01.ch01.141030.125932.88..wav	sel.05.3242.wav	42	66.5	64.75	1.676	1.772	2.132	3.418	1.708	44	50732	44	56144	type comments here
sel.02.ch01.141030.125936.78..wav	sel.05.3242.wav	47	70.08	63.54	1.852	1.857	1.825	3.381	1.827	44	43736	44	56144	type comments here
sel.03.ch01.141030.125938.33..wav	sel.05.3242.wav	71	65.76	41.65	1.629	1.896	2.782	4.22	1.643	44	50248	44	56144	type comments here
sel.04.ch01.141030.125939.54..wav	sel.05.3242.wav	58	69.93	52.81	1.79	1.791	2.035	3.789	1.744	44	56936	44	56144	type comments here
sel.05.ch01.141030.125941.18..wav	sel.05.3242.wav	63	68.29	60.79	2.013	1.875	2.462	4.008	1.837	44	52712	44	56144	type comments here
AVERAGE		50.7917	67.0671	67.6225	1.86687	1.75896	2.4545	3.12683	1.64125	44	50878.7	44	43120
Sound 1	Sound 2	%Similarity	Accuracy	%Sequential	Pitch diff	FM diff	Entropy diff	Goodness diff	AM diff	From(1)	To(1)	From(2)	To(2)	Comments
sel.02.3241.wav	sel.01.ch01.141030.125654.10..wav	48	72.51	86.37	1.985	2.071	2.417	5.962	1.396	44	36212	44	41976	type comments here
sel.03.3241.wav	sel.01.ch01.141030.125654.10..wav	50	69.34	93.01	2.026	2.05	2.471	5.71	1.54	44	39072	44	41976	type comments here
sel.04.3241.wav	sel.01.ch01.141030.125654.10..wav	44	72.86	93.29	2.006	1.908	2.305	6.361	1.287	44	39424	44	41976	type comments here
sel.05.3241.wav	sel.01.ch01.141030.125654.10..wav	46	71.78	93.51	2.091	1.994	2.188	6.555	1.296	44	39424	44	41976	type comments here
sel.01.3241.wav	sel.01.ch01.141030.125742.54..wav	67	69.75	30.55	1.796	1.532	2.392	3.049	1.411	44	39072	44	54648	type comments here
sel.02.3241.wav	sel.01.ch01.141030.125742.54..wav	68	69.74	62.28	1.931	1.576	2.602	3.304	1.338	44	36212	44	54648	type comments here
sel.03.3241.wav	sel.01.ch01.141030.125742.54..wav	65	69.57	56.25	1.982	1.547	2.637	2.684	1.48	44	39072	44	54648	type comments here
sel.04.3241.wav	sel.01.ch01.141030.125742.54..wav	59	70.01	39.88	1.956	1.568	2.694	3.139	1.223	44	39424	44	54648	type comments here
sel.05.3241.wav	sel.01.ch01.141030.125742.54..wav	60	68.31	43.68	2.039	1.583	2.626	3.481	1.241	44	39424	44	54648	type comments here
sel.01.3241.wav	sel.02.ch01.141030.125658.26..wav	55	67.85	52.11	1.465	1.63	2.597	3.317	1.343	44	39072	44	43736	type comments here
sel.02.3241.wav	sel.02.ch01.141030.125658.26..wav	55	67.59	56.69	1.605	1.667	2.807	3.52	1.265	44	36212	44	43736	type comments here
sel.03.3241.wav	sel.02.ch01.141030.125658.26..wav	55	65.73	45.88	1.651	1.647	2.85	2.999	1.415	44	39072	44	43736	type comments here
sel.04.3241.wav	sel.02.ch01.141030.125658.26..wav	55	67.2	49.49	1.625	1.756	3.044	3.491	1.155	44	39424	44	43736	type comments here
sel.05.3241.wav	sel.02.ch01.141030.125658.26..wav	50	66.31	58.21	1.708	1.719	2.999	3.811	1.165	44	39424	44	43736	type comments here
sel.01.3241.wav	sel.02.ch01.141030.125746.81..wav	54	73.13	50.16	1.747	1.688	2.592	3.478	1.504	44	39072	44	35156	type comments here
sel.02.3241.wav	sel.02.ch01.141030.125746.81..wav	45	74.77	73.72	1.88	1.725	2.802	3.674	1.422	44	36212	44	35156	type comments here
sel.03.3241.wav	sel.02.ch01.141030.125746.81..wav	47	71.15	70.23	1.936	1.694	2.845	3.175	1.572	44	39072	44	35156	type comments here
sel.04.3241.wav	sel.02.ch01.141030.125746.81..wav	45	75.94	61.78	1.907	1.802	2.945	3.677	1.311	44	39424	44	35156	type comments here
sel.05.3241.wav	sel.02.ch01.141030.125746.81..wav	48	71.38	54.86	1.987	1.779	2.885	3.96	1.323	44	39424	44	35156	type comments here
sel.01.3241.wav	sel.03.ch01.141030.125701.91..wav	46	73.91	69.78	1.972	1.641	2.287	3.955	1.511	44	39072	44	37268	type comments here
sel.02.3241.wav	sel.03.ch01.141030.125701.91..wav	48	72.53	77.85	2.11	1.678	2.494	4.142	1.432	44	36212	44	37268	type comments here
sel.03.3241.wav	sel.03.ch01.141030.125701.91..wav	43	70.32	77.9	2.154	1.655	2.539	3.656	1.577	44	39072	44	37268	type comments here
sel.04.3241.wav	sel.03.ch01.141030.125701.91..wav	39	68.69	70.94	2.129	1.767	2.66	4.179	1.322	44	39424	44	37268	type comments here
sel.05.3241.wav	sel.03.ch01.141030.125701.91..wav	42	70.77	67.82	2.214	1.74	2.594	4.471	1.332	44	39424	44	37268	type comments here
AVERAGE		51.4167	70.4642	64.01	1.91258	1.72571	2.63633	3.98958	1.36921	44	38622.8	44	42581

## Sheet: Group 1 Day 100 Final Songs
Individual	Treatment	Begin Time (s)	End Time (s)	Low Freq (Hz)	High Freq (Hz)	Avg Power (dB)	Energy (dB)	Max Power (dB)	Peak Freq (Hz)	# notes	Bandwidth	Duration	Tempo
3237	N	0.046	1.011	991	18581.5	58.2	100.5	87.9	5857	5	17590.5	0.965	5.18135
3237	N	0.027	0.977	495.5	19448.6	59.5	102.1	85.9	6718.4	5	18953.1	0.95	5.26316
3237	N	0.044	1.572	495.5	19572.5	58.9	103.5	86.9	6029.3	8	19077	1.528	5.2356
3237	N	0.052	1.026	619.4	18333.7	59	101.3	83.7	6373.8	5	17714.3	0.974	5.13347
3237	N	0.04	0.788	371.6	19448.6	60.9	102.5	88.5	5857	4	19077	0.748	5.34759
3238	S	0.025	0.363	867.1	18457.6	68.1	105.8	92.7	4651.2	2	17590.5	0.338	5.91716
3238	S	0.032	0.38	867.1	19448.6	67.1	105.1	91.3	4651.2	2	18581.5	0.348	5.74713
3238	S	0.034	0.381	619.4	18209.8	68.4	106.3	95.5	4306.6	2	17590.4	0.347	5.76369
3238	S	0.029	0.38	1114.9	20191.9	66.2	104.5	92	4651.2	2	19077	0.351	5.69801
3238	S	0.024	0.371	495.5	19572.5	66.4	104.6	92.8	4306.6	2	19077	0.347	5.76369
3241	S	0.035	0.882	743.3	15236.8	55.3	96.2	83.9	3789.8	7	14493.5	0.847	8.26446
3241	S	0.025	0.801	867.1	17094.9	57.3	98.3	86.3	3617.6	6	16227.8	0.776	7.73196
3241	S	0.039	0.879	619.4	18953.1	57.3	99.2	87.6	3789.8	7	18333.7	0.84	8.33333
3241	S	0.029	0.884	619.4	15608.4	55.5	96.6	84	4306.6	7	14989	0.855	8.18713
3241	S	0.022	0.874	0	15112.9	64.4	105.5	92.3	172.3	7	15112.9	0.852	8.21596
3242	S	0.025	0.732	371.6	13502.5	59.9	99.6	84.5	3617.6	5	13130.9	0.707	7.07214
3242	S	0.027	0.736	371.6	17962.1	60.8	101.8	88.4	3617.6	5	17590.5	0.709	7.05219
3242	S	0.039	0.779	371.6	12883.1	61.6	101.3	87.5	3617.6	5	12511.5	0.74	6.75676
3242	S	0.037	1.224	495.5	14493.5	57.7	99.9	87.5	3617.6	8	13998	1.187	6.73968
3242	S	0.046	1.233	0	17838.2	58.7	102	87.2	3445.3	8	17838.2	1.187	6.73968
3244	N	0.052	1.629	495.5	19324.7	64.8	109.5	89.5	3962.1	7	18829.2	1.577	4.43881
3244	N	0.047	1.231	619.4	13874.2	67.4	109.3	89.8	3962.1	5	13254.8	1.184	4.22297
3244	N	0.032	1.243	743.3	13874.2	66	108	89.3	4134.4	5	13130.9	1.211	4.12882
3244	N	0.039	1.439	867.1	12883.1	65.4	107.7	88.8	3962.1	7	12016	1.4	5
3244	N	0.046	1.104	743.3	13998	65.1	106.6	87.7	4134.4	5	13254.7	1.058	4.7259
3246	S	0.046	1.385	495.5	18953.1	66.3	110.2	95.2	4478.9	11	18457.6	1.339	8.21509
3246	S	0.037	1.103	371.6	19077	67.5	110.5	92.9	3962.1	7	18705.4	1.066	6.5666
3246	S	0.108	1.145	123.9	18953.1	68.7	111.6	95.5	4651.2	7	18829.2	1.037	6.75024
3246	S	0.037	1.165	495.5	19077	67.8	111.1	94.6	4478.9	8	18581.5	1.128	7.0922
3246	S	0.052	1.166	495.5	18209.8	68.3	111.3	93.6	3962.1	8	17714.3	1.114	7.18133
3248	N	0.046	0.597	867.1	19572.5	58.3	98.4	83.5	4823.4	3	18705.4	0.551	5.44465
3248	N	0.034	0.515	247.8	19200.8	59.4	99	83.5	4823.4	3	18953	0.481	6.23701
3248	N	0.037	0.58	371.6	12263.8	59.3	97.4	82.4	4823.4	3	11892.2	0.543	5.52486
3248	N	0.039	0.707	619.4	17094.9	58.6	99.1	83.1	4823.4	4	16475.5	0.668	5.98802
3253	N	0.047	0.661	371.6	13130.9	58.2	97.2	81.9	4823.4	3	12759.3	0.614	4.88599
3253	N	0.024	0.557	495.5	15732.3	56.1	95.2	79.7	4134.4	5	15236.8	0.533	9.38086
3253	N	0.046	0.58	743.3	13378.7	57.3	95.6	82.7	4134.4	5	12635.4	0.534	9.3633
3253	N	0.02	0.562	495.5	13007	57.5	95.8	79.9	3962.1	5	12511.5	0.542	9.22509
3253	N	0.04	0.594	495.5	15236.8	56.8	96	81	3962.1	5	14741.3	0.554	9.02527
3253	N	0.039	0.624	619.4	15360.7	57.2	96.6	79.9	3962.1	5	14741.3	0.585	8.54701
3254	N	0.015	0.631	247.8	14245.8	60.5	99.8	91	4134.4	3	13998	0.616	4.87013
3254	N	0.703	1.321	495.5	12387.6	61.4	100.1	91.9	4306.6	3	11892.1	0.618	4.85437
3254	N	1.377	1.995	495.5	11644.4	61.6	100.1	90.5	4134.4	3	11148.9	0.618	4.85437
3254	N	2.059	2.685	619.4	13750.3	61.4	100.5	91	3962.1	4	13130.9	0.626	6.38978
3254	N	2.767	3.377	619.4	14741.3	60.9	100.3	91.5	4306.6	3	14121.9	0.61	4.91803
3256	N	0.019	0.589	743.3	18705.3	60.7	100.8	88.9	5512.5	4	17962	0.57	7.01754
3256	N	0.653	1.223	867.1	16599.4	60.9	100.5	88	5512.5	4	15732.3	0.57	7.01754
3256	N	1.29	1.857	495.5	18457.6	60.3	100.4	88.4	5168	4	17962.1	0.567	7.05467
3256	N	1.898	2.462	495.5	18209.8	60.5	100.5	87.8	5168	4	17714.3	0.564	7.0922
3256	N	2.536	3.119	495.5	17342.7	61.5	101.4	86.8	4995.7	4	16847.2	0.583	6.86106
3261	S	0.035	0.758	867.1	19200.8	62.2	103.4	88	3100.8	6	18333.7	0.723	8.29876
3261	S	0.829	1.557	495.5	19077	62.1	103.4	85.6	4995.7	6	18581.5	0.728	8.24176
3261	S	1.581	2.31	743.3	18829.2	61.9	103.1	87.5	3100.8	6	18085.9	0.729	8.23045
3261	S	2.385	3.122	619.4	19077	61.2	102.5	87.8	3100.8	6	18457.6	0.737	8.14111
3261	S	3.145	3.747	743.3	19200.8	61	101.5	83.6	4823.4	5	18457.5	0.602	8.30565
3262	S	0.044	0.307	743.3	17838.2	62	98.5	89.2	6029.3	1	17094.9	0.263	3.80228
3262	S	0.38	0.893	743.3	16847.2	57.8	97	88.7	6029.3	3	16103.9	0.513	5.84795
3262	S	0.985	1.506	743.3	14989	60.2	98.9	89.3	6029.3	3	14245.7	0.521	5.75816
3262	S	1.655	2.174	619.4	12635.4	59.6	97.5	89	6029.3	3	12016	0.519	5.78035
3262	S	2.281	2.702	495.5	12511.5	59.8	96.9	89.5	4995.7	2	12016	0.421	4.75059
3263	N	0.047	0.402	123.9	13254.8	60.2	96.9	83.9	172.3	2	13130.9	0.355	5.6338
3263	N	0.479	0.845	743.3	12511.5	57.6	94	82.4	5857	2	11768.2	0.366	5.46448
3263	N	0.9	1.253	619.4	13007	54	90.4	79.8	5168	2	12387.6	0.353	5.66572
3263	N	1.307	1.533	867.1	13007	55.8	90.2	77.5	5340.2	1	12139.9	0.226	4.42478
3263	N	1.627	1.985	867.1	11396.6	57.9	93.7	83.9	6029.3	2	10529.5	0.358	5.58659
3367	S	0.035	1.583	371.6	18829.2	73	117.6	106.8	4995.7	10	18457.6	1.548	6.45995
3367	S	1.626	2.846	619.4	19324.7	73.8	117.4	107.3	4995.7	8	18705.3	1.22	6.55738
3367	S	2.925	4.086	743.3	18457.6	72	115.2	104.6	4823.4	8	17714.3	1.161	6.89061
3367	S	4.12	5.271	619.4	18581.5	72.5	115.7	108.1	4995.7	8	17962.1	1.151	6.95048
3367	S	5.293	6.616	495.5	19077	74.4	118.4	109.9	4995.7	10	18581.5	1.323	7.55858
3368	S	0.025	0.444	371.6	19077	77.5	116.4	106.8	4995.7	4	18705.4	0.419	9.54654
3368	S	0.474	0.847	619.4	19696.3	75.9	114.4	101.6	4995.7	4	19076.9	0.373	10.7239
3368	S	0.893	1.306	743.3	19448.6	76.6	115.5	105	4995.7	4	18705.3	0.413	9.68523
3368	S	1.367	1.881	619.4	20687.4	74.2	114.3	102.1	4995.7	4	20068	0.514	7.7821
3368	S	1.913	2.423	495.5	19077	75	114.8	103.7	5168	5	18581.5	0.51	9.80392
3375	N	0.027	1.157	619.4	20563.5	79.7	123.2	111	4478.9	8	19944.1	1.13	7.07965
3375	N	1.268	2.378	743.3	20315.7	79.6	123	110.8	4478.9	6	19572.4	1.11	5.40541
3375	N	2.561	3.604	619.4	17590.4	80.8	123.3	110.8	4478.9	6	16971	1.043	5.75264
3375	N	3.709	4.767	619.4	18581.5	80.5	123.3	111.2	4478.9	6	17962.1	1.058	5.67108
3375	N	4.868	5.928	743.3	18581.5	80.4	123.1	110.5	4651.2	6	17838.2	1.06	5.66038
3376	N	0.051	1.304	495.5	17714.3	64	107.3	89.8	2239.5	5	17218.8	1.253	3.99042
3376	N	1.412	2.666	867.1	18705.3	63.5	107	89.1	2239.5	5	17838.2	1.254	3.98724
3376	N	2.747	4.172	743.3	19324.7	62.7	106.9	88.2	4134.4	6	18581.4	1.425	4.21053
3376	N	4.236	5.681	495.5	19696.3	62.3	106.7	88.5	2239.5	6	19200.8	1.445	4.15225
3376	N	5.773	7.038	743.3	18829.2	63.5	107.1	89.9	3273	5	18085.9	1.265	3.95257
3377	N	0.03	0.759	619.4	15112.9	60.3	100.5	90.3	4823.4	4	14493.5	0.729	5.48697
3377	N	0.798	1.508	867.1	14617.4	60.1	100	91.9	4306.6	4	13750.3	0.71	5.6338
3377	N	1.559	2.252	743.3	14741.3	60.3	100.2	92.4	4306.6	3	13998	0.693	4.329
3377	N	2.306	2.995	743.3	14989	60.6	100.5	91.5	4306.6	3	14245.7	0.689	4.35414
3378	N	0.037	0.786	619.4	14245.8	59.2	99.3	83.8	3273	4	13626.4	0.749	5.34045
3378	N	0.884	1.54	495.5	15856.2	58.6	98.7	86.2	3273	4	15360.7	0.656	6.09756
3378	N	1.643	2.406	619.4	14989	57.9	98.3	85.4	3273	4	14369.6	0.763	5.24246
3378	N	2.504	3.288	619.4	14741.3	58.3	98.7	84	3273	4	14121.9	0.784	5.10204
3378	N	3.391	4.142	743.3	15112.9	58.9	99.2	86.9	3273	4	14369.6	0.751	5.32623
3380	S	0.024	0.823	743.3	14369.7	59.5	99.9	88.9	5857	4	13626.4	0.799	5.00626
3380	S	0.918	1.711	743.3	13998	59.9	100.1	85.4	5857	4	13254.7	0.793	5.04414
3380	S	1.805	2.445	743.3	13626.4	60.1	99.3	82.3	4306.6	3	12883.1	0.64	4.6875
3380	S	2.531	3.324	743.3	14989	59.5	100	85.2	5857	4	14245.7	0.793	5.04414
3380	S	3.384	4.024	619.4	13998	59.8	99.1	84.7	5168	3	13378.6	0.64	4.6875
3381	S	0.042	0.925	495.5	18333.7	75.3	117.3	98.7	2584	5	17838.2	0.883	5.66251
3381	S	1.012	2.022	619.4	16351.7	75.2	117.2	98.4	2584	6	15732.3	1.01	5.94059
3381	S	2.097	2.999	495.5	18086	75.8	117.8	99.3	2584	5	17590.5	0.902	5.54324
3381	S	3.096	3.971	619.4	19324.7	73.6	115.8	97.9	4306.6	5	18705.3	0.875	5.71429
3381	S	4.063	4.952	495.5	19077	73.4	115.6	98.2	1722.7	5	18581.5	0.889	5.6243

## Sheet: Group 1 Cort
Baby band	Cage Code	Cage position	Treatment	Sex	Hematocrit	CORT raw	CORT /4
3236	C5T	T	Noise	M	55	18.535	4.63375
3237	C10T	T	Noise	M	50	19.422	4.8555
3238	C4B	B	Silent	M	57	8.587	2.14675
3239	C4B	B	Silent	F	53	11.45	2.8625
3240	C4B	B	Silent	F	NA	15.083	3.77075
3241	C3M	M	Silent	M	53	8.601	2.15025
3242	C3M	M	Silent	M	54	12.61	3.77075
3243	C3M	M	Silent	F	53	6.737	1.68425
3244	C10T	T	Noise	M	49	9.597	2.39925
3245	C10T	T	Noise	F	49	15.356	3.839
3246	C3M	M	Silent	M	53	15.078	3.7695
3247	C5T	T	Noise	F	54	15.429	3.85725
3248	C5T	T	Noise	M	54	16.963	4.24075
3249	C5T	T	Noise	M	NA	19.252	4.813
3250	C6B	B	Silent	F	54	28.751	7.18775
3251	C6B	B	Silent	M	55	14.341	3.58525
3252	C10B	B	Noise	F	54	6.43	1.6075
3253	C10B	B	Noise	M	53	13.521	3.38025
3254	C10B	B	Noise	M	52	4.101	1.02525
3255	C9T	T	Noise	F	55	7.392	1.848
3256	C9T	T	Noise	M	57	8.226	2.0565
3257	C4U	U	Silent	F	57	10.125	2.53125
3258	C4U	U	Silent	F	55	12.662	3.1655
3259	C4U	U	Silent	F	59	11.317	2.82925
3261	C4U	U	Silent	M	54	17.511	4.37775
3262	C4L	L	Silent	M	52	10.691	2.67275
3263	C5L	L	Noise	M	62	11.981	2.99525
3365	C3B	B	Silent	F	50	14.091	3.52275
3366	C3B	B	Silent	F	59	10.023	2.50575
3367	C3B	B	Silent	M	54	8.947	2.23675
3368	C3B	B	Silent	M	51	11.843	2.96075
3369	C3T	T	Silent	F	49	15.96	3.99
3370	C3T	T	Silent	F	53	8.278	2.0695
3371	C3T	T	Silent	F	52	10.009	2.50225
3372	C3T	T	Silent	F	52	17.822	4.4555
3373	C3T	T	Silent	F	43	8.828	2.207
3374	C9B	B	Noise	F	54	21.094	5.2735
3375	C9B	B	Noise	M	50	21.065	5.26625
3376	C9B	B	Noise	M	56	14.931	3.73275
3377	C9B	B	Noise	M	48	19.448	4.862
3378	C9B	B	Noise	M	51	9.738	2.4345
3379	C9B	B	Noise	F	54	11.474	2.8685
3380	C6T	T	Silent	M	48	13.213	3.30325
3381	C6M	M	Silent	M	53	13.371	3.34275

## Sheet: Group 1 Brain measurements
WHOLE BRAIN					AREA X					HVC					RA
ID	Slice whole brain	Area whole brain	Volume whole brain		ID	Slice	Area	Volume of slice		ID	Slice	Area	Volume of slice		ID	Slice	Area	Volume of slice
3381	22	0			3236	84	0.386	0.02316		3236	70	0.036	0.00216		3236	110	0.084	0.00504
3381	24	12.24	0.2448		3236	86	0.472	0.02832		3236	72	0.064	0.00384		3236	112	0.196	0.01176
3381	26	14.374	0.797563		3236	88	0.637	0.03822		3236	74	0.096	0.00576		3236	114	0.282	0.01692
3381	28	15.019	0.881719		3236	90	0.813	0.04878		3236	76	0.118	0.00708		3236	116	0.383	0.02298
3381	30	16.028	0.931246		3236	92	0.897	0.05382		3236	78	0.118	0.00708		3236	117	0.412	0.02472
3381	32	17.934	1.01832		3236	94	1.144	0.06864		3236	80	0.152	0.00912		3236	118	0.348	0.02088
3381	34	20.254	1.14493		3236	96	1.209	0.07254		3236	82	0.182	0.01092		3236	120	0.361	0.02166
3381	36	21.882	1.26377		3236	98	1.255	0.0753		3236	84	0.211	0.01266		3236	122	0.306	0.01836
3381	38	19.652	1.24542		3236	100	1.205	0.0723		3236	86	0.25	0.015		3236	124	0.263	0.01578
3381	40	22.972	1.27743		3236	102	1.273	0.07638		3236	88	0.3	0.018		3236	126	0.2	0.012
3381	42	22.594	1.36696		3236	104	0.99	0.0594		3236	90	0.323	0.01938		3236	128	0.203	0.01218
3381	44	24.11	1.40087		3236	106	1.293	0.07758		3236	92	0.309	0.01854		3236	130	0.166	0.00996
3381	46	22.156	1.38757		3236	108	0.484	0.02904		3236	94	0.304	0.01824		3236	132	0.064	0.00384
3381	48	22.303	1.33377		3236	110	0.798	0.04788		3236	96	0.332	0.01992		3236	134	0.063	0.00378
3381	50	24.258	1.39642		3236	112	0.844	0.05064		3236	98	0.318	0.01908		3237	48	0.083	0.00498
3381	52	23.63	1.4366		3236	116	0.667	0.04002		3236	100	0.312	0.01872		3237	50	0.211	0.01266
3381	54	22.725	1.39056		3236	118	0.432	0.02592	0.88794	3236	102	0.282	0.01692		3237	52	0.333	0.01998
3381	56	25.204	1.43723		3237	24	0.415	0.0249		3236	104	0.274	0.01644		3237	54	0.383	0.02298
3381	58	25.152	1.51068		3237	26	0.659	0.03954		3236	106	0.25	0.015		3237	58	0.434	0.02604
3381	60	24.524	1.49024		3237	28	0.843	0.05058		3236	108	0.187	0.01122		3237	60	0.44	0.0264
3381	62	24.828	1.48055		3237	30	0.706	0.04236		3236	110	0.134	0.00804		3237	62	0.416	0.02496
3381	64	25.863	1.52062		3237	32	1.96	0.1176		3236	112	0.131	0.00786		3237	64	0.378	0.02268
3381	66	25.394	1.53769		3237	34	1.085	0.0651		3236	114	0.092	0.00552		3237	66	0.283	0.01698
3381	68	24.42	1.49432		3237	36	1.393	0.08358		3236	116	0.065	0.0039		3237	68	0.235	0.0141
3381	70	23.93	1.45048		3237	38	1.303	0.07818		3236	118	0.041	0.00246		3237	70	0.21	0.0126
3381	72	25.219	1.4743		3237	40	1.342	0.08052		3237	38	0.042	0.00252		3237	72	0.116	0.00696
3381	74	24.905	1.50371		3237	42	0.996	0.05976		3237	40	0.061	0.00366		3237	74	0.053	0.00318
3381	76	25.667	1.5171		3237	44	1.47	0.0882		3237	42	0.083	0.00498		3238	58	0.205	0.0123
3381	78	24.315	1.49928		3237	46	1.037	0.06222		3237	44	0.174	0.01044		3238	60	0.241	0.01446
3381	80	25.73	1.50115		3237	48	1.249	0.07494		3237	46	0.261	0.01566		3238	62	0.295	0.0177
3381	82	24.76	1.51461		3237	50	1.169	0.07014		3237	48	0.236	0.01416		3238	64	0.358	0.02148
3381	84	25.059	1.49456		3237	52	1.154	0.06924		3237	50	0.322	0.01932		3238	66	0.343	0.02058
3381	86	25.195	1.50762		3237	54	1.091	0.06546		3237	52	0.345	0.0207		3238	68	0.353	0.02118
3381	88	25.101	1.50888		3237	56	0.848	0.05088		3237	54	0.347	0.02082		3238	70	0.337	0.02022
3381	90	24.776	1.4963		3237	58	0.734	0.04404		3237	58	0.381	0.02286		3238	72	0.3	0.018
3381	92	25.027	1.49408		3237	60	0.418	0.02508		3237	60	0.372	0.02232		3238	74	0.254	0.01524
3381	94	25.065	1.50276		3237	62	0.449	0.02694	1.21926	3237	62	0.374	0.02244		3238	76	0.115	0.0069
3381	96	23.888	1.46845		3238	34	0.182	0.01092		3237	64	0.327	0.01962		3238	78	0.11	0.0066
3381	98	24.193	1.44242		3238	36	0.337	0.02022		3237	66	0.335	0.0201		3238	80	0.075	0.0045
3381	100	24.17	1.45089		3238	38	0.672	0.04032		3237	68	0.331	0.01986		3241	88	0.132	0.00792
3381	102	25.161	1.47983		3238	40	0.78	0.0468		3237	70	0.205	0.0123		3241	90	0.217	0.01302
3381	104	24.742	1.49707		3238	42	0.859	0.05154		3237	72	0.194	0.01164		3241	92	0.353	0.02118
3381	106	23.101	1.43501		3238	44	1.034	0.06204		3237	74	0.121	0.00726		3241	94	0.42	0.0252
3381	108	22.416	1.36546		3238	46	1.099	0.06594		3237	76	0.066	0.00396		3241	96	0.395	0.0237
3381	110	23.074	1.36465		3238	48	1.013	0.06078		3238	36	0.135	0.0081		3241	98	0.449	0.02694
3381	112	23.439	1.39538		3238	50	1.174	0.07044		3238	38	0.202	0.01212		3241	100	0.35	0.021
3381	114	23.706	1.41434		3238	52	1.353	0.08118		3238	40	0.21	0.0126		3241	102	0.354	0.02124
3381	116	24.574	1.44832		3238	54	1.321	0.07926		3238	42	0.292	0.01752		3241	104	0.221	0.01326
3381	118	23.109	1.43026		3238	56	1.363	0.08178		3238	44	0.307	0.01842		3241	106	0.242	0.01452
3381	120	22.542	1.36949		3238	58	1.146	0.06876		3238	46	0.324	0.01944		3241	108	0.198	0.01188
3381	122	23.252	1.37376		3238	60	1.003	0.06018		3238	48	0.269	0.01614		3242	66	0.046	0.00276
3381	124	21.241	1.33434		3238	62	0.173	0.01038	0.81054	3238	50	0.244	0.01464		3242	68	0.165	0.0099
3381	126	22.542	1.3133		3241	58	0.924	0.05544		3238	52	0.249	0.01494		3242	70	0.246	0.01476
3381	128	23.009	1.36651		3241	60	0.743	0.04458		3238	54	0.286	0.01716		3242	72	0.295	0.0177
3381	130	22.353	1.36081		3241	62	1.002	0.06012		3238	56	0.23	0.0138		3242	74	0.388	0.02328
3381	132	22.127	1.33439		3241	64	0.547	0.03282		3238	58	0.268	0.01608		3242	76	0.411	0.02466
3381	134	21.851	1.31933		3241	66	0.597	0.03582		3238	60	0.276	0.01656		3242	78	0.437	0.02622
3381	136	22.317	1.32502		3241	68	0.588	0.03528		3238	62	0.286	0.01716		3242	80	0.419	0.02514
3381	138	20.188	1.27462		3241	70	0.849	0.05094		3238	64	0.227	0.01362		3242	82	0.394	0.02364
3381	140	19.968	1.20467		3241	72	1.003	0.06018		3238	66	0.204	0.01224		3242	84	0.372	0.02232
3381	142	19.908	1.19628		3241	74	0.981	0.05886		3238	68	0.22	0.0132		3242	86	0.336	0.02016
3381	144	20.523	1.21288		3241	76	0.954	0.05724		3238	70	0.217	0.01302		3242	88	0.308	0.01848
3381	146	19.846	1.21101		3241	78	0.803	0.04818		3238	72	0.169	0.01014		3242	90	0.208	0.01248
3381	148	19.087	1.16792		3241	80	1.484	0.08904		3238	74	0.136	0.00816		3242	92	0.149	0.00894
3381	150	18.584	1.1301		3241	82	1.62	0.0972		3241	44	0.05	0.003		3244	38	0.074	0.00444
3381	152	18.67	1.11762		3241	84	1.608	0.09648		3241	46	0.062	0.00372		3244	40	0.115	0.0069
3381	152	18.344	0		3241	86	1.791	0.10746		3241	48	0.115	0.0069		3244	44	0.147	0.00882
3381	156	17.674	2.16096		3241	88	1.522	0.09132		3241	50	0.187	0.01122		3244	46	0.236	0.01416
3381	158	17.805	1.06437		3241	90	1.33	0.0798		3241	52	0.202	0.01212		3244	48	0.301	0.01806
3381	160	17.211	1.05043		3241	92	1.386	0.08316		3241	54	0.274	0.01644		3244	50	0.293	0.01758
3381	162	16.086	0.99872		3241	94	1.571	0.09426		3241	56	0.274	0.01644		3244	52	0.434	0.02604
3381	164	16.05	0.96408		3241	96	1.559	0.09354		3241	58	0.336	0.02016		3244	54	0.484	0.02904
3381	166	15.015	0.931778		3241	98	1.508	0.09048		3241	60	0.395	0.0237		3244	56	0.347	0.02082
3381	168	15.133	0.904438		3241	100	1.205	0.0723		3241	62	0.369	0.02214		3244	58	0.413	0.02478
3381	170	14.423	0.886595		3241	102	1.112	0.06672		3241	64	0.323	0.01938		3244	60	0.257	0.01542
3381	172	13.48	0.836931		3241	104	1.033	0.06198		3241	66	0.299	0.01794		3244	62	0.409	0.02454
3381	201	0	3.9092		3241	106	1.041	0.06246		3241	68	0.273	0.01638		3244	64	0.306	0.01836
3380	8	0	0		3241	108	0.661	0.03966	1.76532	3241	70	0.311	0.01866		3244	68	0.191	0.01146
3380	10	24.831	0.49662		3242	38	0.444	0.02664		3241	72	0.267	0.01602		3244	70	0.385	0.0231
3380	12	24.816	1.48941		3242	40	1.035	0.0621		3241	74	0.267	0.01602		3246	82	0.093	0.00558
3380	14	27.925	1.58131		3242	42	0.741	0.04446		3241	76	0.274	0.01644		3246	84	0.188	0.01128
3380	16	28.775	1.70094		3242	44	1.154	0.06924		3241	78	0.228	0.01368		3246	86	0.333	0.01998
3380	18	29.169	1.73831		3242	46	1.202	0.07212		3241	80	0.227	0.01362		3246	88	0.389	0.02334
3380	20	28.744	1.73737		3242	48	1.2	0.072		3241	82	0.2	0.012		3246	90	0.399	0.02394
3380	22	31.093	1.79465		3242	50	1.365	0.0819		3241	84	0.185	0.0111		3246	92	0.439	0.02634
3380	24	28.718	1.79386		3242	52	1.312	0.07872		3241	86	0.109	0.00654		3246	98	0.355	0.0213
3380	26	28.844	1.72686		3242	54	1.392	0.08352		3241	88	0.126	0.00756		3246	100	0.312	0.01872
3380	28	29.039	1.73649		3242	56	1.336	0.08016		3241	90	0.093	0.00558		3246	102	0.243	0.01458
3380	30	28.752	1.73372		3242	58	1.288	0.07728		3242	50	0.128	0.00768		3246	104	0.135	0.0081
3380	32	29.6	1.7505		3242	60	1.352	0.08112		3242	52	0.119	0.00714		3248	52	0.194	0.01164
3380	34	30.299	1.79693		3242	62	1.215	0.0729		3242	54	0.154	0.00924		3248	54	0.273	0.01638
3380	36	32.505	1.88373		3242	64	1.16	0.0696		3242	56	0.166	0.00996		3248	56	0.379	0.02274
3380	38	31.077	1.9073		3242	66	0.818	0.04908		3242	58	0.196	0.01176		3248	58	0.434	0.02604
3380	40	31.757	1.88498		3242	68	0.877	0.05262		3242	60	0.198	0.01188		3248	60	0.437	0.02622
3380	42	30.727	1.87444		3242	70	0.614	0.03684		3242	62	0.241	0.01446		3248	62	0.396	0.02376
3380	44	32.718	1.90304		3242	72	0.946	0.05676		3242	64	0.216	0.01296		3248	64	0.349	0.02094
3380	46	30.515	1.89661		3242	74	0.452	0.02712		3242	66	0.234	0.01404		3248	66	0.324	0.01944
3380	48	30.987	1.84504		3242	76	0.366	0.02196		3242	68	0.288	0.01728		3248	68	0.294	0.01764
3380	50	30.646	1.84898		3242	78	0.281	0.01686	1.233	3242	70	0.27	0.0162		3248	70	0.221	0.01326
3380	52	31.95	1.87774		3244	40	0.484	0.02904		3242	72	0.215	0.0129		3248	72	0.171	0.01026
3380	54	32.486	1.93306		3244	42	0.465	0.0279		3242	74	0.232	0.01392		3248	74	0.131	0.00786
3380	56	32.024	1.93528		3244	44	0.595	0.0357		3242	76	0.24	0.0144		3248	76	0.076	0.00456
3380	25	34.396	-30.8787		3244	46	0.901	0.05406		3242	78	0.239	0.01434		3249	74	0.085	0.0051
3380	58	34.169	33.9396		3244	48	1.043	0.06258		3242	80	0.268	0.01608		3249	76	0.219	0.01314
3380	60	32.598	2.00283		3244	50	1.265	0.0759		3242	82	0.241	0.01446		3249	78	0.344	0.02064
3380	62	32.829	1.96281		3244	52	1.2	0.072		3242	84	0.286	0.01716		3249	80	0.386	0.02316
3380	64	31.823	1.93948		3244	54	1.255	0.0753		3242	86	0.305	0.0183		3249	82	0.378	0.02268
3380	66	31.457	1.89839		3244	56	1.505	0.0903		3242	88	0.329	0.01974		3249	84	0.464	0.02784
3380	68	31.4	1.88571		3244	58	1.01	0.0606		3242	90	0.296	0.01776		3249	86	0.437	0.02622
3380	70	31.744	1.89431		3244	62	1.077	0.06462		3242	92	0.298	0.01788		3249	88	0.354	0.02124
3380	72	30.813	1.87664		3244	64	1.228	0.07368		3242	94	0.265	0.0159		3249	90	0.329	0.01974
3380	74	31.321	1.864		3244	70	0.871	0.05226	0.77394	3242	96	0.203	0.01218		3249	92	0.298	0.01788
3380	76	30.717	1.86111		3246	52	0.464	0.02784		3242	98	0.192	0.01152		3249	94	0.264	0.01584
3380	78	28.822	1.78587		3246	54	0.611	0.03666		3242	100	0.178	0.01068		3249	96	0.206	0.01236
3380	80	30.149	1.76898		3246	56	0.855	0.0513		3242	102	0.109	0.00654		3249	98	0.131	0.00786
3380	82	30.133	1.80846		3246	58	1.058	0.06348		3242	104	0.122	0.00732		3249	100	0.066	0.00396
3380	84	31.799	1.85774		3246	60	1.106	0.06636		3244	28	0.159	0.00954		3251	56	0.119	0.00714
3380	86	31.339	1.89412		3246	62	1.272	0.07632		3244	30	0.192	0.01152		3251	58	0.231	0.01386
3380	88	31.16	1.87497		3246	64	1.319	0.07914		3244	32	0.223	0.01338		3251	60	0.285	0.0171
3380	90	30.242	1.84199		3246	66	1.358	0.08148		3244	34	0.268	0.01608		3251	62	0.386	0.02316
3380	92	29.581	1.79465		3246	68	1.426	0.08556		3244	36	0.29	0.0174		3251	64	0.407	0.02442
3380	94	29.31	1.76672		3246	70	1.333	0.07998		3244	38	0.284	0.01704		3251	66	0.406	0.02436
3380	96	30.511	1.79451		3246	72	1.377	0.08262		3244	40	0.289	0.01734		3251	68	0.38	0.0228
3380	98	28.414	1.76738		3246	74	1.344	0.08064		3244	42	0.32	0.0192		3251	70	0.398	0.02388
3380	100	27.792	1.68615		3246	76	1.292	0.07752		3244	44	0.309	0.01854		3251	72	0.352	0.02112
3380	102	27.514	1.65917		3246	78	1.118	0.06708		3244	46	0.269	0.01614		3251	74	0.251	0.01506
3380	104	29.904	1.72204		3246	80	0.863	0.05178		3244	48	0.29	0.0174		3251	76	0.218	0.01308
3380	106	27.613	1.72505		3246	82	0.695	0.0417		3244	50	0.267	0.01602		3251	78	0.113	0.00678
3380	108	28.159	1.67313		3246	84	0.638	0.03828		3244	52	0.286	0.01716		3253	66	0.133	0.00798
3380	110	30.818	1.76871		3246	86	0.348	0.02088		3244	54	0.271	0.01626		3253	68	0.265	0.0159
3380	114	27.589	3.50263		3246	88	0.332	0.01992		3244	56	0.29	0.0174		3253	70	0.322	0.01932
3380	118	26.768	3.2613		3246	90	0.467	0.02802	1.15656	3244	58	0.3	0.018		3253	72	0.405	0.0243
3380	120	27.234	1.62004		3248	14	0.773	0.04638		3244	60	0.289	0.01734		3253	74	0.466	0.02796
3380	122	25.422	1.57937		3248	16	1.114	0.06684		3244	62	0.259	0.01554		3253	76	0.496	0.02976
3380	124	27.571	1.58935		3248	18	1.273	0.07638		3244	64	0.262	0.01572		3253	78	0.497	0.02982
3380	126	24.882	1.5729		3248	20	1.298	0.07788		3244	66	0.139	0.00834		3253	80	0.472	0.02832
3380	128	26.189	1.53196		3248	22	1.638	0.09828		3244	68	0.194	0.01164		3253	82	0.449	0.02694
3380	130	24.085	1.50778		3248	24	1.266	0.07596		3244	70	0.189	0.01134		3253	84	0.411	0.02466
3380	132	22.695	1.40319		3248	26	1.082	0.06492		3244	72	0.163	0.00978		3253	86	0.312	0.01872
3380	134	26.717	1.48072		3248	28	1.259	0.07554		3244	74	0.112	0.00672		3253	88	0.243	0.01458
3380	114	27.1	-16.145		3248	30	1.371	0.08226		3244	76	0.115	0.0069		3253	90	0.138	0.00828
3380	116	24.325	1.542		3248	32	1.477	0.08862		3246	52	0.092	0.00552		3254	52	0.103	0.00618
3380	136	22.114	13.9264		3248	34	1.386	0.08316		3246	54	0.092	0.00552		3254	54	0.201	0.01206
3380	138	22.366	1.33439		3248	36	1.459	0.08754		3246	56	0.1	0.006		3254	56	0.301	0.01806
3380	140	22.587	1.34858		3248	38	1.177	0.07062		3246	58	0.138	0.00828		3254	58	0.369	0.02214
3380	142	20.645	1.29652		3248	42	0.797	0.04782		3246	60	0.214	0.01284		3254	60	0.368	0.02208
3380	144	20.641	1.23858		3248	44	0.455	0.0273		3246	62	0.273	0.01638		3254	62	0.386	0.02316
3380	146	20.436	1.2323		3248	46	0.513	0.03078		3246	64	0.271	0.01626		3254	64	0.391	0.02346
3380	148	19.334	1.19295		3248	48	0.39	0.0234	1.12368	3246	66	0.319	0.01914		3254	66	0.369	0.02214
3380	150	20.127	1.18375		3249	24	0.932	0.05592		3246	68	0.293	0.01758		3254	68	0.333	0.01998
3380	152	20.004	1.20393		3249	27	0.958	0.05748		3246	70	0.33	0.0198		3254	70	0.305	0.0183
3380	154	18.716	1.16139		3249	29	0.698	0.04188		3246	72	0.381	0.02286		3254	72	0.261	0.01566
3380	156	18.104	1.10455		3249	30	0.853	0.05118		3246	74	0.36	0.0216		3254	74	0.167	0.01002
3380	158	17.849	1.07858		3249	32	0.883	0.05298		3246	76	0.355	0.0213		3254	76	0.13	0.0078
3380	160	16.471	1.02932		3249	34	0.857	0.05142		3246	78	0.38	0.0228		3256	78	0.09	0.0054
3380	162	16.197	0.980029		3249	36	1.041	0.06246		3246	80	0.318	0.01908		3256	80	0.186	0.01116
3380	164	14.896	0.932518		3249	38	1.114	0.06684		3246	82	0.354	0.02124		3256	82	0.268	0.01608
3380	168	14.175	1.74408		3249	40	0.606	0.03636		3246	84	0.366	0.02196		3256	84	0.321	0.01926
3380	170	12.551	0.801286		3249	42	1.394	0.08364		3246	86	0.318	0.01908		3256	86	0.308	0.01848
3380	193	0	2.88673		3249	44	1.494	0.08964		3246	88	0.333	0.01998		3256	88	0.406	0.02436
3378	8	0	0		3249	46	1.364	0.08184		3246	90	0.277	0.01662		3256	90	0.361	0.02166
3378	10	20.837	0.41674		3249	48	1.532	0.09192		3248	30	0.056	0.00336		3256	92	0.363	0.02178
3378	12	22.868	1.31068		3249	50	1.124	0.06744		3248	32	0.076	0.00456		3256	94	0.334	0.02004
3378	14	25.857	1.46083		3249	52	1.5	0.09		3248	34	0.084	0.00504		3256	96	0.235	0.0141
3378	16	23.604	1.48332		3249	54	1.55	0.093		3248	36	0.146	0.00876		3256	98	0.191	0.01146
3378	18	24.335	1.43811		3249	56	0.747	0.04482		3248	38	0.187	0.01122		3256	100	0.105	0.0063
3378	20	24.879	1.47639		3249	58	1.069	0.06414		3248	40	0.165	0.0099		3256	102	0.068	0.00408
3378	22	26.5	1.54111		3249	60	1.226	0.07356		3248	42	0.229	0.01374		3261	58	0.118	0.00708
3378	24	27.338	1.61507		3249	62	0.884	0.05304		3248	44	0.237	0.01422		3261	60	0.213	0.01278
3378	26	26.287	1.60865		3249	64	0.692	0.04152		3248	46	0.255	0.0153		3261	62	0.332	0.01992
3378	28	28.711	1.64941		3249	66	0.538	0.03228	1.38336	3248	48	0.272	0.01632		3261	64	0.393	0.02358
3378	30	29.716	1.75272		3251	20	0.561	0.03366		3248	50	0.253	0.01518		3261	66	0.425	0.0255
3378	32	29.263	1.76935		3251	22	0.584	0.03504		3248	52	0.287	0.01722		3261	68	0.4	0.024
3378	34	29.877	1.77417		3251	24	1.148	0.06888		3248	54	0.282	0.01692		3261	70	0.369	0.02214
3378	36	29.901	1.79334		3251	26	1.321	0.07926		3248	56	0.272	0.01632		3261	72	0.402	0.02412
3378	38	30.135	1.80108		3251	28	0.844	0.05064		3248	58	0.255	0.0153		3261	74	0.36	0.0216
3378	40	31.015	1.83444		3251	30	1.09	0.0654		3248	60	0.256	0.01536		3261	76	0.308	0.01848
3378	42	29.733	1.8223		3251	32	0.384	0.02304		3248	62	0.253	0.01518		3261	78	0.261	0.01566
3378	44	29.186	1.76754		3251	34	1.213	0.07278		3248	64	0.222	0.01332		3261	80	0.178	0.01068
3378	46	31.105	1.80842		3251	36	1.062	0.06372		3248	66	0.18	0.0108		3261	82	0.086	0.00516
3378	48	30.791	1.85687		3251	38	0.61	0.0366		3248	68	0.182	0.01092		3261	84	0.053	0.00318
3378	50	29.983	1.82317		3251	42	1.045	0.0627		3248	70	0.164	0.00984		3262	90	0.09	0.0054
3378	52	29.213	1.77583		3251	44	0.761	0.04566		3248	72	0.148	0.00888		3262	92	0.168	0.01008
3378	54	28.009	1.71653		3251	46	0.594	0.03564		3248	74	0.088	0.00528		3262	94	0.267	0.01602
3378	56	29.52	1.72567		3251	48	0.625	0.0375		3248	76	0.036	0.00216		3262	96	0.337	0.02022
3378	58	30.655	1.80514		3251	50	0.468	0.02808		3249	42	0.064	0.00384		3262	100	0.39	0.0234
3378	60	30.927	1.84745		3251	52	0.446	0.02676		3249	44	0.049	0.00294		3262	102	0.326	0.01956
3378	62	30.486	1.84237		3251	54	0.312	0.01872	0.78408	3249	46	0.091	0.00546		3262	104	0.449	0.02694
3378	64	29.367	1.79549		3253	38	0.251	0.01506		3249	48	0.109	0.00654		3262	106	0.408	0.02448
3378	66	29.873	1.77718		3253	40	0.414	0.02484		3249	50	0.13	0.0078		3262	108	0.427	0.02562
3378	68	29.553	1.78277		3253	42	0.501	0.03006		3249	52	0.155	0.0093		3262	110	0.31	0.0186
3378	70	29.984	1.78609		3253	44	0.606	0.03636		3249	54	0.231	0.01386		3262	112	0.301	0.01806
3378	72	29.007	1.76965		3253	46	0.846	0.05076		3249	56	0.287	0.01722		3262	114	0.277	0.01662
3378	74	29.725	1.76192		3253	48	0.851	0.05106		3249	58	0.297	0.01782		3262	116	0.17	0.0102
3378	76	28.612	1.75		3253	50	0.808	0.04848		3249	60	0.3	0.018		3262	118	0.158	0.00948
3378	78	28.778	1.7217		3253	52	1.2	0.072		3249	62	0.348	0.02088		3262	120	0.075	0.0045
3378	80	28.139	1.70747		3253	54	1.092	0.06552		3249	64	0.305	0.0183		3262	122	0.077	0.00462
3378	82	28.424	1.69688		3253	56	1.336	0.08016		3249	66	0.335	0.0201		3262	124	0.092	0.00552
3378	84	28.112	1.69607		3253	58	1.246	0.07476		3249	68	0.409	0.02454		3367	88	0.144	0.00864
3378	86	27.466	1.6673		3253	60	1.212	0.07272		3249	70	0.394	0.02364		3367	90	0.269	0.01614
3378	88	27.197	1.63988		3253	62	1.151	0.06906		3249	72	0.364	0.02184		3367	92	0.348	0.02088
3378	90	27.477	1.64021		3253	64	1.07	0.0642		3249	74	0.327	0.01962		3367	94	0.421	0.02526
3378	92	28.904	1.69125		3253	66	1.21	0.0726		3249	76	0.326	0.01956		3367	96	0.406	0.02436
3378	94	27.307	1.6861		3253	68	0.934	0.05604		3249	78	0.363	0.02178		3367	98	0.449	0.02694
3378	96	28.348	1.66955		3253	70	0.754	0.04524		3249	80	0.312	0.01872		3367	100	0.4	0.024
3378	98	27.563	1.67727		3253	72	0.754	0.04524		3249	82	0.336	0.02016		3367	102	0.378	0.02268
3378	100	26.48	1.62118		3253	74	0.506	0.03036		3249	84	0.258	0.01548		3367	104	0.326	0.01956
3378	102	26.752	1.59695		3253	76	0.332	0.01992		3249	86	0.265	0.0159		3367	106	0.217	0.01302
3378	104	25.754	1.57509		3253	78	0.294	0.01764		3249	88	0.261	0.01566		3367	108	0.123	0.00738
3378	106	24.679	1.51288		3253	80	0.09	0.0054	1.04748	3249	90	0.22	0.0132		3367	110	0.063	0.00378
3378	108	25.391	1.50205		3254	22	0.377	0.02262		3249	92	0.175	0.0105		3368	44	0.191	0.01146
3378	110	23.607	1.46962		3254	24	0.575	0.0345		3249	94	0.179	0.01074		3368	46	0.291	0.01746
3378	112	23.84	1.4234		3254	26	0.728	0.04368		3249	96	0.131	0.00786		3368	48	0.314	0.01884
3378	114	23.732	1.42716		3254	28	0.855	0.0513		3249	98	0.072	0.00432		3368	50	0.438	0.02628
3378	116	23.361	1.41278		3254	30	0.863	0.05178		3251	46	0.034	0.00204		3368	52	0.469	0.02814
3378	118	22.305	1.36986		3254	32	1.045	0.0627		3251	48	0.06	0.0036		3368	54	0.481	0.02886
3378	120	22.13	1.33305		3254	34	1.164	0.06984		3251	50	0.112	0.00672		3368	56	0.481	0.02886
3378	122	21.806	1.31807		3254	36	0.95	0.057		3251	52	0.106	0.00636		3368	58	0.413	0.02478
3378	124	21.382	1.29562		3254	38	0.988	0.05928		3251	54	0.118	0.00708		3368	60	0.391	0.02346
3378	126	19.94	1.23941		3254	40	1.085	0.0651		3251	56	0.166	0.00996		3368	62	0.278	0.01668
3378	128	21.328	1.23781		3254	42	0.978	0.05868		3251	58	0.2	0.012		3368	64	0.211	0.01266
3378	130	21.189	1.27551		3254	44	0.878	0.05268		3251	60	0.241	0.01446		3368	66	0.228	0.01368
3378	132	19.742	1.22767		3254	46	0.907	0.05442		3251	62	0.181	0.01086		3368	68	0.103	0.00618
3378	134	18.788	1.15578		3254	48	0.785	0.0471		3251	64	0.212	0.01272		3375	68	0.032	0.00192
3378	136	16.552	1.05949		3254	50	0.642	0.03852		3251	66	0.268	0.01608		3375	70	0.149	0.00894
3378	138	17.288	1.01512		3254	52	0.521	0.03126		3251	68	0.198	0.01188		3375	72	0.241	0.01446
3378	140	16.902	1.02568		3254	54	0.465	0.0279		3251	70	0.215	0.0129		3375	74	0.315	0.0189
3378	142	16.027	0.987754		3254	56	0.153	0.00918	0.83754	3251	72	0.281	0.01686		3375	76	0.4	0.024
3378	144	15.741	0.953027		3256	22	0.654	0.03924		3251	74	0.282	0.01692		3375	78	0.371	0.02226
3378	146	14.291	0.90061		3256	24	0.668	0.04008		3251	76	0.245	0.0147		3375	80	0.437	0.02622
3378	148	14.007	0.848926		3256	28	0.737	0.04422		3251	78	0.288	0.01728		3375	82	0.44	0.0264
3378	150	13.888	0.836847		3256	32	0.835	0.0501		3251	80	0.236	0.01416		3375	86	0.288	0.01728
3378	152	11.744	0.768062		3256	34	1.026	0.06156		3251	82	0.253	0.01518		3375	88	0.339	0.02034
3378	154	11.737	0.70443		3256	36	0.728	0.04368		3251	84	0.243	0.01458		3375	90	0.208	0.01248
3378	156	10.851	0.677466		3256	38	0.951	0.05706		3251	86	0.209	0.01254		3375	92	0.177	0.01062
3378	158	9.587	0.612749		3256	40	1.191	0.07146		3251	88	0.22	0.0132		3375	94	0.102	0.00612
3378	160	7.71	0.517889		3256	42	0.885	0.0531		3251	90	0.165	0.0099		3376	62	0.095	0.0057
3378	162	6.39	0.422381		3256	44	0.975	0.0585		3251	92	0.138	0.00828		3376	64	0.254	0.01524
3378	164	5.665	0.361432		3256	46	0.978	0.05868		3251	94	0.141	0.00846		3376	66	0.348	0.02088
3378	166	4.469	0.303312		3256	48	1.039	0.06234		3251	96	0.099	0.00594		3376	68	0.325	0.0195
3378	168	3.663	0.24356		3256	50	0.935	0.0561		3251	98	0.071	0.00426		3376	70	0.327	0.01962
3378	176	0	0.29304		3256	52	0.762	0.04572		3251	100	0.082	0.00492		3376	72	0.411	0.02466
3377	8	0	0		3256	54	0.433	0.02598		3253	32	0.066	0.00396		3376	74	0.328	0.01968
3377	10	15.244	0.30488		3256	56	0.333	0.01998	0.7878	3253	36	0.122	0.00732		3376	76	0.3	0.018
3377	12	16.009	0.937496		3261	30	0.251	0.01506		3253	38	0.176	0.01056		3376	78	0.216	0.01296
3377	14	13.81	0.893758		3261	32	0.442	0.02652		3253	40	0.249	0.01494		3376	80	0.141	0.00846
3377	16	12.559	0.790773		3261	34	0.496	0.02976		3253	42	0.242	0.01452		3376	82	0.12	0.0072
3377	18	18.125	0.915429		3261	36	0.653	0.03918		3253	44	0.291	0.01746		3376	84	0.056	0.00336
3377	20	20.359	1.15387		3261	38	0.866	0.05196		3253	46	0.303	0.01818		3377	74	0.07	0.0042
3377	22	27.675	1.43542		3261	40	0.984	0.05904		3253	48	0.315	0.0189		3377	76	0.177	0.01062
3377	24	28.08	1.67264		3261	42	1.157	0.06942		3253	50	0.314	0.01884		3377	78	0.243	0.01458
3377	26	24.23	1.56788		3261	44	1.281	0.07686		3253	52	0.328	0.01968		3377	80	0.346	0.02076
3377	28	26.845	1.53158		3261	46	1.296	0.07776		3253	54	0.279	0.01674		3377	82	0.429	0.02574
3377	30	27.57	1.6324		3261	48	1.494	0.08964		3253	56	0.286	0.01716		3377	84	0.424	0.02544
3377	32	27.969	1.66616		3261	50	1.628	0.09768		3253	58	0.274	0.01644		3377	86	0.388	0.02328
3377	34	28.241	1.68629		3261	52	1.73	0.1038		3253	60	0.281	0.01686		3377	88	0.377	0.02262
3377	36	29.381	1.72855		3261	54	1.574	0.09444		3253	62	0.219	0.01314		3377	90	0.353	0.02118
3377	38	29.061	1.75325		3261	56	1.514	0.09084		3253	64	0.216	0.01296		3377	92	0.257	0.01542
3377	40	30.144	1.77605		3261	58	1.64	0.0984		3253	66	0.094	0.00564		3377	94	0.164	0.00984
3377	42	29.002	1.77427		3261	60	1.541	0.09246		3253	68	0.172	0.01032		3377	96	0.14	0.0084
3377	44	31.06	1.80151		3261	62	1.305	0.0783		3253	70	0.153	0.00918		3377	98	0.098	0.00588
3377	46	30.801	1.85582		3261	64	1.329	0.07974		3253	72	0.138	0.00828		3378	48	0.1	0.006
3377	48	31.062	1.85588		3261	66	1.184	0.07104		3253	74	0.083	0.00498		3378	50	0.205	0.0123
3377	50	32.469	1.90577		3261	68	1.131	0.06786		3253	76	0.06	0.0036		3378	52	0.275	0.0165
3377	52	31.128	1.90777		3261	70	0.827	0.04962		3253	78	0.053	0.00318		3378	54	0.326	0.01956
3377	54	31.744	1.88613		3261	72	0.706	0.04236		3253	80	0.038	0.00228		3378	56	0.368	0.02208
3377	56	32.626	1.93104		3261	74	0.517	0.03102		3254	48	0.075	0.0045		3378	58	0.361	0.02166
3377	58	32.268	1.94681		3261	76	0.407	0.02442	1.55718	3254	50	0.085	0.0051		3378	60	0.372	0.02232
3377	60	31.632	1.91697		3262	54	1.015	0.0609		3254	52	0.079	0.00474		3378	62	0.342	0.02052
3377	62	31.992	1.90871		3262	56	0.663	0.03978		3254	54	0.14	0.0084		3378	64	0.314	0.01884
3377	64	31.726	1.91153		3262	58	0.569	0.03414		3254	56	0.16	0.0096		3378	66	0.251	0.01506
3377	66	31.372	1.89293		3262	60	0.742	0.04452		3254	58	0.164	0.00984		3378	68	0.234	0.01404
3377	68	32.156	1.90579		3262	62	0.487	0.02922		3254	60	0.191	0.01146		3378	70	0.166	0.00996
3377	70	33.004	1.95474		3262	64	0.818	0.04908		3254	62	0.231	0.01386		3378	72	0.099	0.00594
3377	72	32.895	1.97697		3262	66	0.743	0.04458		3254	64	0.222	0.01332		3378	74	0.044	0.00264
3377	74	32.264	1.95474		3262	68	0.928	0.05568		3254	66	0.23	0.0138		3380	78	0.121	0.00726
3377	76	31.835	1.92296		3262	70	0.755	0.0453	0.4032	3254	68	0.253	0.01518		3380	80	0.156	0.00936
3377	78	32.188	1.92068		3367	20	0.395	0.0237		3254	70	0.298	0.01788		3380	82	0.26	0.0156
3377	80	32.413	1.93803		3367	22	0.458	0.02748		3254	72	0.272	0.01632		3380	84	0.337	0.02022
3377	82	31.382	1.91377		3367	24	0.56	0.0336		3254	74	0.273	0.01638		3380	86	0.408	0.02448
3377	84	31.351	1.88199		3367	26	0.86	0.0516		3254	76	0.23	0.0138		3380	88	0.407	0.02442
3377	86	30.994	1.87034		3367	28	0.873	0.05238		3254	78	0.244	0.01464		3380	90	0.317	0.01902
3377	88	30.512	1.84516		3367	30	1.143	0.06858		3254	80	0.293	0.01758		3380	92	0.299	0.01794
3377	90	28.99	1.78487		3367	32	1.15	0.069		3254	82	0.243	0.01458		3380	94	0.246	0.01476
3377	92	28.67	1.72979		3367	34	1.356	0.08136		3254	84	0.219	0.01314		3380	96	0.192	0.01152
3377	94	30.049	1.76141		3367	36	1.199	0.07194		3254	86	0.2	0.012		3380	98	0.113	0.00678
3377	96	31.059	1.83316		3367	38	1.489	0.08934		3254	88	0.172	0.01032		3380	100	0.094	0.00564
3377	98	30.315	1.84117		3367	40	1.426	0.08556		3254	90	0.106	0.00636		3381	88	0.128	0.00768
3377	100	29.675	1.79967		3367	42	1.333	0.07998		3254	92	0.079	0.00474		3381	90	0.191	0.01146
3377	102	28.445	1.74347		3367	44	1.237	0.07422		3256	48	0.043	0.00258		3381	92	0.328	0.01968
3377	104	27.607	1.6815		3367	46	1.238	0.07428		3256	50	0.054	0.00324		3381	94	0.319	0.01914
3377	106	27.599	1.65618		3367	48	1.079	0.06474		3256	52	0.058	0.00348		3381	96	0.392	0.02352
3377	108	27.1	1.64095		3367	50	0.858	0.05148		3256	54	0.077	0.00462		3381	98	0.408	0.02448
3377	110	26.45	1.60646		3367	52	0.705	0.0423		3256	56	0.107	0.00642		3381	100	0.436	0.02616
3377	112	26.37	1.5846		3367	54	0.52	0.0312		3256	58	0.153	0.00918		3381	102	0.407	0.02442
3377	114	26.152	1.57566		3367	56	0.47	0.0282		3256	60	0.162	0.00972		3381	104	0.352	0.02112
3377	116	25.83	1.55945		3367	58	0.455	0.0273	1.12824	3256	62	0.149	0.00894		3381	106	0.274	0.01644
3377	118	26.238	1.56202		3368	26	0.192	0.01152		3256	64	0.192	0.01152		3381	108	0.18	0.0108
3377	120	26.884	1.59362		3368	28	0.17	0.0102		3256	66	0.225	0.0135		3381	110	0.11	0.0066
3377	122	25.356	1.56698		3368	30	0.36	0.0216		3256	68	0.256	0.01536		3381	112	0.054	0.00324
3377	124	23.163	1.45507		3368	32	0.292	0.01752		3256	70	0.226	0.01356		3263	99	0.2	0.012
3377	126	24.735	1.43668		3368	34	0.39	0.0234		3256	72	0.206	0.01236		3263	100	0.23	0.0138
3377	128	25.009	1.49231		3368	36	0.611	0.03666		3256	74	0.217	0.01302		3263	102	0.325	0.0195
3377	130	24.672	1.49042		3368	38	0.777	0.04662		3256	76	0.217	0.01302		3263	104	0.39	0.0234
3377	134	24.43	2.94611		3368	40	0.973	0.05838		3256	78	0.209	0.01254		3263	106	0.36	0.0216
3377	136	22.32	1.40202		3368	42	1.095	0.0657		3256	80	0.24	0.0144		3263	110	0.386	0.02316
3377	138	22.542	1.34585		3368	44	1.12	0.0672		3256	82	0.201	0.01206		3263	112	0.341	0.02046
3377	140	23.16	1.37102		3368	46	1.364	0.08184		3256	84	0.178	0.01068		3263	114	0.304	0.01824
3377	142	22.71	1.37608		3368	48	1.385	0.0831		3256	88	0.168	0.01008		3263	116	0.124	0.00744
3377	144	21.935	1.33928		3368	50	1.506	0.09036		3256	90	0.129	0.00774
3377	146	22.22	1.32464		3368	52	1.431	0.08586		3256	92	0.133	0.00798
3377	148	20.956	1.29509		3368	54	1.594	0.09564		3256	94	0.123	0.00738
3377	150	20.573	1.24585		3368	56	1.548	0.09288		3256	96	0.061	0.00366
3377	152	20.145	1.22152		3368	58	1.36	0.0816		3256	98	0.048	0.00288
3377	154	19.539	1.19047		3368	60	1.358	0.08148		3256	100	0.05	0.003
3377	156	19.756	1.17884		3368	62	1.295	0.0777		3261	26	0.055	0.0033
3377	158	18.348	1.14286		3368	64	1.105	0.0663		3261	28	0.068	0.00408
3377	160	17.696	1.08126		3368	66	1.011	0.06066		3261	30	0.101	0.00606
3377	162	16.22	1.01716		3368	68	0.626	0.03756		3261	32	0.116	0.00696
3377	164	15.308	0.945708		3368	70	0.453	0.02718		3261	34	0.153	0.00918
3377	166	14.821	0.903831		3368	72	0.244	0.01464	1.3356	3261	36	0.169	0.01014
3377	168	14.158	0.869294		3375	42	0.248	0.01488		3261	38	0.178	0.01068
3377	191	0	3.25634		3375	44	0.634	0.03804		3261	40	0.184	0.01104
3376	8	0	0		3375	46	0.529	0.03174		3261	42	0.241	0.01446
3376	10	21.636	0.43272		3375	48	0.644	0.03864		3261	44	0.24	0.0144
3376	12	22.218	1.31558		3375	50	1.015	0.0609		3261	46	0.203	0.01218
3376	14	22.569	1.3436		3375	52	0.905	0.0543		3261	48	0.229	0.01374
3376	16	22.777	1.36038		3375	54	1.162	0.06972		3261	50	0.254	0.01524
3376	18	24.089	1.4058		3375	56	1.088	0.06528		3261	52	0.208	0.01248
3376	20	23.082	1.41502		3375	58	1.196	0.07176		3261	54	0.267	0.01602
3376	22	23.762	1.40527		3375	60	0.977	0.05862		3261	56	0.267	0.01602
3376	24	24.688	1.45341		3375	62	1.283	0.07698		3261	58	0.273	0.01638
3376	26	25.95	1.51898		3375	64	1.197	0.07182		3261	60	0.244	0.01464
3376	28	24.8	1.52237		3375	66	1.215	0.0729		3261	62	0.256	0.01536
3376	30	25.21	1.50028		3375	68	1.196	0.07176		3261	64	0.265	0.0159
3376	32	24.927	1.5041		3375	70	1.2	0.072		3261	66	0.288	0.01728
3376	34	25.87	1.52382		3375	72	1.054	0.06324		3261	70	0.227	0.01362
3376	36	25.476	1.54036		3375	74	1.008	0.06048		3261	72	0.271	0.01626
3376	38	27.056	1.57572		3375	76	0.819	0.04914		3261	74	0.258	0.01548
3376	40	28.271	1.65968		3375	78	0.767	0.04602		3261	76	0.18	0.0108
3376	42	26.631	1.64681		3375	80	0.333	0.01998		3261	78	0.162	0.00972
3376	44	27.982	1.63822		3375	82	0.348	0.02088		3261	80	0.119	0.00714
3376	46	28.299	1.68842		3375	84	0.242	0.01452	1.1436	3261	82	0.078	0.00468
3376	48	28.67	1.70906		3376	34	0.774	0.04644		3262	42	0.105	0.0063
3376	50	28.855	1.72575		3376	36	0.239	0.01434		3262	44	0.097	0.00582
3376	52	29.102	1.7387		3376	38	0.689	0.04134		3262	46	0.091	0.00546
3376	54	31.056	1.80442		3376	40	0.569	0.03414		3262	48	0.201	0.01206
3376	56	29.931	1.82951		3376	42	0.824	0.04944		3262	50	0.33	0.0198
3376	58	29.646	1.7873		3376	44	1.011	0.06066		3262	52	0.304	0.01824
3376	60	30.91	1.81655		3376	46	1.162	0.06972		3262	54	0.318	0.01908
3376	62	28.858	1.79269		3376	48	1.324	0.07944		3262	56	0.315	0.0189
3376	64	30.012	1.76599		3376	50	1.427	0.08562		3262	58	0.376	0.02256
3376	66	28.802	1.7643		3376	52	1.355	0.0813		3262	60	0.416	0.02496
3376	68	29.031	1.73499		3376	54	1.481	0.08886		3262	62	0.363	0.02178
3376	70	28.892	1.73769		3376	56	1.578	0.09468		3262	64	0.295	0.0177
3376	72	27.053	1.67805		3376	58	1.64	0.0984		3262	66	0.156	0.00936
3376	74	29.94	1.70906		3376	60	1.541	0.09246		3262	68	0.233	0.01398
3376	76	28.782	1.76155		3376	62	1.521	0.09126		3262	70	0.172	0.01032
3376	78	28.539	1.71962		3376	64	1.474	0.08844		3262	72	0.166	0.00996
3376	80	27.977	1.69545		3376	66	1.277	0.07662		3262	74	0.154	0.00924
3376	82	28.248	1.68674		3376	68	1.375	0.0825		3262	78	0.088	0.00528
3376	84	27.712	1.67877		3376	70	1.031	0.06186		3367	72	0.072	0.00432
3376	86	28.017	1.67186		3376	72	0.683	0.04098		3367	74	0.1	0.006
3376	88	28.008	1.68075		3376	74	0.663	0.03978		3367	76	0.154	0.00924
3376	90	27.957	1.67895		3376	76	0.483	0.02898		3367	78	0.198	0.01188
3376	92	27.546	1.66507		3376	78	0.419	0.02514		3367	80	0.259	0.01554
3376	94	27.821	1.661		3376	80	0.252	0.01512	1.48752	3367	82	0.274	0.01644
3376	96	27.184	1.65011		3377	48	0.314	0.01884		3367	84	0.279	0.01674
3376	98	25.81	1.58964		3377	50	0.444	0.02664		3367	86	0.276	0.01656
3376	100	27.852	1.60947		3377	52	0.631	0.03786		3367	88	0.255	0.0153
3376	102	26.725	1.63719		3377	54	1.001	0.06006		3367	90	0.264	0.01584
3376	104	25.45	1.56509		3377	56	1.065	0.0639		3367	92	0.295	0.0177
3376	106	26.236	1.55052		3377	58	1.114	0.06684		3367	94	0.301	0.01806
3376	108	26.148	1.57152		3377	60	1.158	0.06948		3367	96	0.287	0.01722
3376	110	25.606	1.55259		3377	62	1.22	0.0732		3367	98	0.271	0.01626
3376	112	26.424	1.56084		3377	64	1.297	0.07782		3367	100	0.223	0.01338
3376	114	27.289	1.61132		3377	66	1.221	0.07326		3367	102	0.176	0.01056
3376	116	26.926	1.62644		3377	68	1.275	0.0765		3367	104	0.114	0.00684
3376	118	26.528	1.60361		3377	70	1.146	0.06876		3367	106	0.112	0.00672
3376	120	26.023	1.57651		3377	72	1.124	0.06744		3367	108	0.044	0.00264
3376	122	25.065	1.53255		3377	74	1.05	0.063		3367	110	0.031	0.00186
3376	124	23.963	1.47072		3377	76	0.833	0.04998		3367	112	0.226	0.01356
3376	126	23.676	1.42916		3377	78	0.838	0.05028		3368	14	0.098	0.00588
3376	128	24.319	1.43981		3377	80	0.661	0.03966		3368	16	0.143	0.00858
3376	130	24.514	1.46499		3377	82	0.384	0.02304		3368	18	0.209	0.01254
3376	134	23.295	2.86823		3377	84	0.359	0.02154		3368	20	0.215	0.0129
3376	136	23.401	1.40088		3377	86	0.222	0.01332	1.04142	3368	22	0.312	0.01872
3376	138	21.481	1.34605		3378	28	0.224	0.01344		3368	24	0.315	0.0189
3376	140	20.842	1.26964		3378	30	0.427	0.02562		3368	26	0.355	0.0213
3376	142	20.366	1.23621		3378	32	0.58	0.0348		3368	28	0.33	0.0198
3376	144	20.193	1.21677		3378	34	0.862	0.05172		3368	30	0.387	0.02322
3376	146	18.691	1.16623		3378	36	0.961	0.05766		3368	32	0.306	0.01836
3376	148	18.492	1.11548		3378	38	1.095	0.0657		3368	34	0.283	0.01698
3376	150	18.137	1.09885		3378	40	1.115	0.0669		3368	36	0.212	0.01272
3376	152	15.886	1.01994		3378	42	1.22	0.0732		3368	38	0.262	0.01572
3376	152	15.196	0		3378	44	1.226	0.07356		3368	40	0.305	0.0183
3376	184	0	4.86272		3378	46	1.202	0.07212		3368	42	0.289	0.01734
3375	8	0	0		3378	48	1.214	0.07284		3368	44	0.314	0.01884
3375	10	26.987	0.53974		3378	50	1.012	0.06072		3368	46	0.335	0.0201
3375	12	27.481	1.63402		3378	52	0.945	0.0567		3368	48	0.267	0.01602
3375	14	27.744	1.65674		3378	54	0.895	0.0537		3368	50	0.278	0.01668
3375	16	24.985	1.58115		3378	56	0.688	0.04128		3368	52	0.244	0.01464
3375	18	27.318	1.56857		3378	58	0.669	0.04014		3368	54	0.219	0.01314
3375	20	27.317	1.63905		3378	60	0.55	0.033		3368	56	0.194	0.01164
3375	22	28.42	1.672		3378	62	0.333	0.01998		3368	58	0.205	0.0123
3375	24	27.431	1.67544		3378	64	0.237	0.01422	0.9273	3368	60	0.131	0.00786
3375	26	28.361	1.67368		3380	34	0.388	0.02328		3368	62	0.12	0.0072
3375	28	28.037	1.69193		3380	36	0.337	0.02022		3375	44	0.143	0.00858
3375	30	29.285	1.71952		3380	38	0.742	0.04452		3375	46	0.249	0.01494
3375	32	28.983	1.74803		3380	40	0.893	0.05358		3375	48	0.265	0.0159
3375	34	29.847	1.76484		3380	42	1.028	0.06168		3375	50	0.257	0.01542
3375	36	30.39	1.80709		3380	44	1.058	0.06348		3375	52	0.244	0.01464
3375	38	30.127	1.8155		3380	46	1.076	0.06456		3375	54	0.24	0.0144
3375	40	27.274	1.72132		3380	48	1.148	0.06888		3375	56	0.2	0.012
3375	42	32.231	1.78308		3380	50	1.231	0.07386		3375	58	0.272	0.01632
3375	44	31.946	1.9253		3380	52	1.166	0.06996		3375	60	0.279	0.01674
3375	46	33.391	1.95995		3380	54	1.46	0.0876		3375	62	0.297	0.01782
3375	48	31.066	1.93329		3380	56	1.371	0.08226		3375	64	0.284	0.01704
3375	50	30.622	1.85062		3380	58	1.391	0.08346		3375	66	0.276	0.01656
3375	52	30.901	1.84568		3380	60	1.28	0.0768		3375	68	0.293	0.01758
3375	54	32.141	1.89114		3380	62	1.17	0.0702		3375	70	0.227	0.01362
3375	56	29.897	1.86073		3380	64	0.864	0.05184		3375	72	0.223	0.01338
3375	58	34.125	1.91926		3380	66	0.843	0.05058		3375	74	0.253	0.01518
3375	60	34.453	2.05733		3380	68	0.726	0.04356		3375	78	0.211	0.01266
3375	62	32.972	2.02259		3380	70	0.521	0.03126		3375	80	0.104	0.00624
3375	64	33.267	1.98716		3380	72	0.379	0.02274		3375	84	0.106	0.00636
3375	66	31.996	1.95777		3380	74	0.308	0.01848	1.1628	3376	44	0.09	0.0054
3375	68	33.301	1.95878		3381	38	0.124	0.00744		3376	46	0.165	0.0099
3375	70	35.171	2.0539		3381	40	0.159	0.00954		3376	48	0.199	0.01194
3375	72	31.932	2.01231		3381	42	0.272	0.01632		3376	50	0.234	0.01404
3375	74	32.974	1.9471		3381	44	0.501	0.03006		3376	52	0.223	0.01338
3375	76	32.618	1.96775		3381	46	0.791	0.04746		3376	54	0.272	0.01632
3375	78	32.311	1.94786		3381	48	0.845	0.0507		3376	58	0.236	0.01416
3375	80	30.527	1.88489		3381	50	1.151	0.06906		3376	60	0.283	0.01698
3375	82	34.88	1.96076		3381	52	1.358	0.08148		3376	62	0.286	0.01716
3375	84	32.968	2.03517		3381	54	1.285	0.0771		3376	64	0.28	0.0168
3375	86	34.19	2.01463		3381	56	1.439	0.08634		3376	66	0.242	0.01452
3375	88	32.607	2.00372		3381	58	1.409	0.08454		3376	68	0.277	0.01662
3375	90	26.479	1.76939		3381	60	1.305	0.0783		3376	72	0.24	0.0144
3375	92	33.582	1.79762		3381	62	1.285	0.0771		3376	74	0.228	0.01368
3375	94	31.098	1.93992		3381	64	1.049	0.06294		3376	76	0.199	0.01194
3375	96	32.294	1.90165		3381	66	1.008	0.06048		3376	78	0.179	0.01074
3375	98	31.33	1.90865		3381	68	1.189	0.07134		3376	80	0.177	0.01062
3375	100	31.01	1.87019		3381	70	1.021	0.06126		3376	82	0.144	0.00864
3375	102	31.739	1.88243		3381	72	0.882	0.05292		3376	84	0.096	0.00576
3375	104	30.881	1.87854		3381	74	0.812	0.04872	1.0731	3376	86	0.075	0.0045
3375	106	31.033	1.85742							3376	88	0.075	0.0045
3375	108	31.041	1.86222							3377	50	0.043	0.00258
3375	110	30.949	1.8597							3377	52	0.069	0.00414
3375	112	33.22	1.92467							3377	54	0.104	0.00624
3375	114	31.116	1.92974							3377	56	0.112	0.00672
3375	116	30.805	1.85762							3377	58	0.174	0.01044
3375	118	29.721	1.81568							3377	60	0.193	0.01158
3375	120	29.51	1.77693							3377	62	0.218	0.01308
3375	122	28.676	1.74552							3377	64	0.247	0.01482
3375	124	28.956	1.72895							3377	66	0.226	0.01356
3375	126	29.102	1.74174							3377	68	0.248	0.01488
3375	128	28.325	1.72276							3377	70	0.292	0.01752
3375	130	21.402	1.48697							3377	72	0.295	0.0177
3375	132	27.85	1.47332							3377	74	0.308	0.01848
3375	134	25.603	1.60312							3377	76	0.3	0.018
3375	136	27.934	1.6056							3377	78	0.3	0.018
3375	138	26.583	1.63534							3377	80	0.322	0.01932
3375	140	26.13	1.58137							3377	82	0.275	0.0165
3375	144	23.27	2.96234							3377	84	0.262	0.01572
3375	146	25.122	1.45141							3377	86	0.217	0.01302
3375	148	23.907	1.47072							3377	88	0.177	0.01062
3375	152	23.221	2.82758							3377	90	0.135	0.0081
3375	154	21.669	1.34643							3377	92	0.092	0.00552
3375	156	20.484	1.26442							3378	32	0.095	0.0057
3375	160	19.341	2.38917							3378	34	0.103	0.00618
3375	162	19.298	1.15917							3378	36	0.119	0.00714
3375	164	19.21	1.15524							3378	38	0.147	0.00882
3375	168	18.944	2.28922							3378	40	0.155	0.0093
3375	170	18.616	1.12679							3378	42	0.178	0.01068
3375	172	18.835	1.12352							3378	44	0.209	0.01254
3375	174	15.786	1.03728							3378	46	0.199	0.01194
3375	176	16.429	0.966386							3378	48	0.24	0.0144
3375	178	17.164	1.00771							3378	50	0.242	0.01452
3375	180	15.37	0.975525							3378	52	0.239	0.01434
3375	182	14.166	0.885834							3378	54	0.266	0.01596
3375	184	13.864	0.840884							3378	56	0.224	0.01344
3375	186	12.619	0.794197							3378	58	0.244	0.01464
3375	188	10.611	0.696031							3378	60	0.218	0.01308
3375	206	0	1.90998							3378	62	0.218	0.01308
3368	8	0	0							3378	64	0.191	0.01146
3368	10	24.291	0.48582							3378	66	0.176	0.01056
3368	12	24.458	1.46247							3378	68	0.178	0.01068
3368	14	25.998	1.51344							3378	70	0.142	0.00852
3368	16	27.075	1.59208							3378	72	0.11	0.0066
3368	18	27.47	1.63634							3378	74	0.06	0.0036
3368	20	27.567	1.65111							3380	22	0.077	0.00462
3368	22	28.533	1.68292							3380	46	0.117	0.00702
3368	24	28.872	1.72214							3380	48	0.126	0.00756
3368	26	29.169	1.74122							3380	50	0.146	0.00876
3368	28	30.144	1.77931							3380	52	0.161	0.00966
3368	30	30.04	1.80552							3380	54	0.168	0.01008
3368	32	30.028	1.80204							3380	56	0.222	0.01332
3368	34	32.844	1.88553							3380	58	0.219	0.01314
3368	36	33.097	1.97823							3380	60	0.252	0.01512
3368	38	33.054	1.98453							3380	62	0.255	0.0153
3368	40	34.76	2.03421							3380	64	0.258	0.01548
3368	42	33.359	2.04343							3380	66	0.262	0.01572
3368	44	32.583	1.97821							3380	68	0.257	0.01542
3368	46	35.719	2.04834							3380	70	0.248	0.01488
3368	48	33.05	2.06255							3380	72	0.212	0.01272
3368	50	33.926	2.00922							3380	74	0.221	0.01326
3368	52	33.854	2.0334							3380	76	0.197	0.01182
3368	54	34.241	2.04284							3380	78	0.2	0.012
3368	56	35.578	2.09444							3380	80	0.174	0.01044
3368	58	36.276	2.15559							3380	84	0.148	0.00888
3368	60	36.437	2.18139							3380	86	0.095	0.0057
3368	62	34.832	2.13789							3380	88	0.065	0.0039
3368	64	34.458	2.07869							3381	54	0.058	0.00348
3368	66	34.682	2.0742							3381	56	0.111	0.00666
3368	68	34.115	2.06389							3381	58	0.105	0.0063
3368	70	32.722	2.00496							3381	60	0.133	0.00798
3368	72	32.383	1.95314							3381	62	0.13	0.0078
3368	74	32.463	1.94538							3381	64	0.154	0.00924
3368	76	32.279	1.94226							3381	66	0.193	0.01158
3368	78	32.115	1.93182							3381	68	0.177	0.01062
3368	80	29.924	1.86078							3381	70	0.195	0.0117
3368	82	31.13	1.8315							3381	72	0.203	0.01218
3368	84	29.831	1.82869							3381	74	0.214	0.01284
3368	86	33.674	1.90399							3381	76	0.223	0.01338
3368	88	34.86	2.05592							3381	78	0.235	0.0141
3368	90	31.694	1.99587							3381	80	0.239	0.01434
3368	92	32.236	1.91788							3381	82	0.207	0.01242
3368	94	30.977	1.89626							3381	84	0.196	0.01176
3368	96	30.962	1.85817							3381	86	0.179	0.01074
3368	98	28.461	1.78216							3381	88	0.135	0.0081
3368	100	29.704	1.74482							3381	90	0.135	0.0081
3368	102	28.938	1.75921							3381	92	0.095	0.0057
3368	104	31.537	1.81369							3381	94	0.077	0.00462
3368	106	29.833	1.84086							3381	96	0.05	0.003
3368	108	27.853	1.73024							3263	99	0.154	0.00924
3368	110	28.371	1.6867							3263	100	0.124	0.00744
3368	112	28.588	1.70877							3263	102	0.236	0.01416
3368	114	25.736	1.62897							3263	104	0.27	0.0162
3368	116	26.046	1.55345							3263	106	0.178	0.01068
3368	118	26.849	1.58679							3263	110	0.286	0.01716
3368	120	25.827	1.58018							3263	112	0.215	0.0129
3368	122	24.883	1.52121							3263	114	0.19	0.0114
3368	124	24.685	1.48704							3263	116	0.194	0.01164
3368	126	25.299	1.49948
3368	128	26.808	1.56299
3368	130	25.635	1.57316
3368	132	23.817	1.48323
3368	134	24.33	1.44438
3368	136	23.662	1.43971
3368	138	23.253	1.40743
3368	140	22.135	1.3615
3368	142	22.752	1.34657
3368	144	19.209	1.25733
3368	146	19.782	1.16969
3368	148	18.397	1.14512
3368	150	17.934	1.0899
3368	152	17.415	1.06043
3368	154	15.647	0.991387
3368	156	15.234	0.926402
3368	180	0	3.65616
3367	8	0	0
3367	10	13.432	0.26864
3367	12	16.628	0.900096
3367	14	17.622	1.02736
3367	16	16.406	1.02062
3367	18	21.205	1.12526
3367	20	22.817	1.32036
3367	22	24.895	1.43091
3367	24	26.471	1.54074
3367	26	26.491	1.58886
3367	28	26.974	1.60393
3367	30	26.185	1.59471
3367	32	29.712	1.6758
3367	34	28.815	1.75574
3367	36	29.009	1.73472
3367	38	26.618	1.6683
3367	40	29.59	1.68545
3367	42	30.226	1.79445
3367	44	28.882	1.77309
3367	46	29.525	1.75217
3367	48	30.675	1.80589
3367	50	26.368	1.70966
3367	52	27.762	1.62372
3367	54	28.571	1.68993
3367	56	26.948	1.66533
3367	58	26.852	1.614
3367	60	25.524	1.57111
3367	62	28.539	1.62105
3367	64	28.376	1.70745
3367	66	27.901	1.68829
3367	68	28.682	1.69744
3367	70	28.158	1.70518
3367	72	27.654	1.67434
3367	74	29.249	1.70687
3367	76	28.044	1.71866
3367	78	29.073	1.71342
3367	80	27.537	1.69809
3367	82	27.307	1.64532
3367	84	27.922	1.65684
3367	86	29.116	1.71102
3367	88	29.546	1.75984
3367	90	28.651	1.74584
3367	92	27.321	1.679
3367	94	28.225	1.66631
3367	96	26.483	1.64096
3367	98	27.515	1.61984
3367	100	26.152	1.60984
3367	102	27.982	1.62371
3367	104	28.319	1.68902
3367	106	27.75	1.68204
3367	108	26.198	1.61822
3367	110	26.615	1.58437
3367	112	28.005	1.63842
3367	114	26.789	1.64369
3367	116	24.976	1.55263
3367	118	25.663	1.51912
3367	120	25.064	1.52177
3367	122	27.313	1.57083
3367	124	24.485	1.55317
3367	126	23.01	1.42462
3367	128	26.863	1.4947
3367	130	25.2	1.56162
3367	132	24.038	1.477
3367	134	25.056	1.47271
3367	136	24.65	1.49116
3367	138	23.826	1.45421
3367	140	22.454	1.3882
3367	142	24.951	1.42149
3367	144	24.586	1.4861
3367	146	22.518	1.41267
3367	148	22.973	1.36471
3367	150	23.181	1.38462
3367	152	21.927	1.35307
3367	154	21.668	1.30784
3367	156	21.185	1.28556
3367	158	21.056	1.26723
3367	160	20.416	1.24411
3367	162	20.231	1.21941
3367	164	19.864	1.20283
3367	166	18.808	1.16002
3367	168	16.988	1.07342
3367	170	16.544	1.00593
3367	172	15.974	0.97549
3367	174	15.897	0.956129
3367	176	13.932	0.894222
3367	204	0	3.90096
3362	8	0	0
3262	11	27.97	0.8391
3262	14	28.389	2.53613
3262	16	28.059	1.69343
3262	18	28.812	1.70608
3262	20	28.129	1.70819
3262	22	32.219	1.80905
3262	24	32.26	1.93437
3262	26	31.181	1.90314
3262	28	30.704	1.85653
3262	30	31.403	1.86317
3262	32	31.953	1.90066
3262	34	30.308	1.86761
3262	36	26.207	1.69396
3262	38	25.886	1.56278
3262	40	26.051	1.55811
3262	42	21.619	1.42804
3262	44	24.31	1.37708
3262	46	32.252	1.69126
3262	48	33.016	1.958
3262	50	30.468	1.90401
3262	52	30.619	1.83261
3262	54	29.557	1.80519
3262	56	30.354	1.79728
3262	58	32.327	1.88012
3262	60	30.981	1.8991
3262	62	31.244	1.86674
3262	64	31.8	1.8913
3262	66	27.617	1.78104
3262	68	30.757	1.75037
3262	70	33.473	1.92633
3262	72	32.608	1.98237
3262	74	32.1	1.94122
3262	76	30.907	1.8901
3262	78	32.038	1.88825
3262	80	29.275	1.83877
3262	82	32.307	1.84671
3262	84	30.866	1.89503
3262	86	31.976	1.88516
3262	88	30.599	1.8771
3262	90	28.626	1.77642
3262	92	30.39	1.77022
3262	94	30.451	1.82523
3262	96	30.286	1.82211
3262	100	29.167	3.56697
3262	102	27.8	1.70885
3262	104	27.37	1.65508
3262	106	29.126	1.69461
3262	110	28.256	3.44279
3262	112	28.448	1.70112
3262	114	27.553	1.67996
3262	116	27.199	1.64255
3262	118	26.845	1.62131
3262	120	28.688	1.66568
3262	122	26.783	1.6638
3262	124	26.402	1.59554
3262	126	26.044	1.57337
3262	128	25.654	1.55093
3262	130	24.777	1.51285
3262	132	24.924	1.49103
3262	134	24.036	1.46872
3262	136	23.615	1.42951
3262	138	23.109	1.40169
3262	140	23.44	1.39646
3262	142	22.415	1.37554
3262	144	23.835	1.38728
3262	148	19.713	2.60897
3262	150	20.349	1.20181
3262	152	19.381	1.19178
3262	154	19.359	1.1622
3262	156	18.961	1.14958
3262	160	18.09	2.22286
3262	162	17.142	1.05683
3262	164	16.84	1.01945
3262	166	15.287	0.963434
3262	168	16.141	0.942724
3262	170	14.811	0.928274
3262	158	17.343	-5.78173
3262	172	14.911	6.76691
3262	174	14.689	0.887992
3262	176	14.881	0.887094
3262	178	12.898	0.832661
3262	180	13.133	0.780919
3262	184	9.799	1.37105
3262	186	10.67	0.613885
3262	188	9.637	0.608947
3262	190	8.926	0.556754
3262	192	8.16	0.512408
3262	194	7.577	0.472002
3262	221	0	2.04579
3361	8	0	0
3261	10	25.266	0.50532
3261	12	26.627	1.55661
3261	14	27.304	1.61789
3261	16	28.72	1.68054
3261	18	27.199	1.67736
3261	20	30.371	1.72623
3261	22	31.504	1.85615
3261	24	29.461	1.82861
3261	26	30.472	1.7979
3261	28	31.787	1.86763
3261	30	36.382	2.04352
3261	32	36.843	2.19674
3261	34	36.336	2.19535
3261	36	34.516	2.12533
3261	38	34.873	2.08166
3261	40	35.43	2.10907
3261	42	36.33	2.15274
3261	44	34.322	2.11927
3261	46	33.7	2.04063
3261	48	34.355	2.04162
3261	50	35.247	2.088
3261	52	33.771	2.07038
3261	54	34.114	2.03654
3261	56	32.929	2.01119
3261	58	33.721	1.99945
3261	60	33.416	2.0141
3261	62	33.114	1.99589
3261	64	32.43	1.96628
3261	66	32.084	1.93541
3261	68	33.436	1.96546
3261	70	31.703	1.95394
3261	72	34.095	1.97351
3261	74	32.387	1.99424
3261	76	33.453	1.97511
3261	78	35.504	2.0684
3261	80	34.287	2.09362
3261	82	35.151	2.08309
3261	84	33.694	2.0652
3261	86	34.301	2.03982
3261	88	34.278	2.05737
3261	90	32.419	2.00065
3261	92	32.169	1.93764
3261	94	31.168	1.90003
3261	96	33.129	1.92861
3261	98	30.818	1.91799
3261	100	30.181	1.82994
3261	102	30.492	1.82018
3261	104	29.033	1.78557
3261	106	29.927	1.76873
3261	108	27.627	1.72616
3261	110	28.404	1.68088
3261	112	28.101	1.69514
3261	114	27.37	1.66408
3261	116	26.744	1.62338
3261	118	25.657	1.57192
3261	120	25.013	1.52006
3261	122	24.409	1.48262
3261	124	24.321	1.4619
3261	126	24.157	1.45434
3261	128	23.716	1.43617
3261	130	22.852	1.39696
3261	132	22.166	1.35049
3261	134	21.788	1.3186
3261	136	21.131	1.28752
3261	138	21.684	1.28441
3261	140	20.11	1.25352
3261	142	19.775	1.19654
3261	144	19.445	1.17659
3261	146	18.634	1.14228
3261	148	17.679	1.08926
3261	150	16.408	1.02237
3261	152	14.844	0.937168
3261	154	13.644	0.854387
3261	156	12.774	0.792397
3261	184	0	3.57672
3256	12	0	0
3256	14	17.097	0.34194
3256	16	17.542	1.03914
3256	18	19.679	1.11602
3256	20	20.712	1.2116
3256	22	21.171	1.25646
3256	24	20.158	1.23975
3256	26	19.76	1.19752
3256	28	21.175	1.22781
3256	30	21.61	1.28353
3256	32	21.172	1.28344
3256	34	20.865	1.2611
3256	36	22.767	1.30855
3256	38	22.627	1.36182
3256	40	22.393	1.35059
3256	42	24.411	1.40368
3256	44	22.325	1.40161
3256	46	23.2	1.36567
3256	48	25.585	1.46297
3256	50	24.999	1.51749
3256	52	23.478	1.45407
3256	54	23.386	1.40592
3256	56	24.545	1.43779
3256	58	22.329	1.4057
3256	60	24.613	1.4077
3256	62	23.119	1.43173
3256	64	23.317	1.39308
3256	66	25.422	1.46172
3256	68	23.963	1.48133
3256	70	26.27	1.50646
3256	72	24.32	1.51732
3256	74	23.442	1.43278
3256	76	23.652	1.41282
3256	78	24.387	1.44111
3256	80	22.299	1.40011
3256	82	21.449	1.31236
3256	84	23.633	1.35193
3256	86	21.039	1.33941
3256	88	23.396	1.33242
3256	90	22.869	1.38792
3256	92	21.422	1.32849
3256	94	21.218	1.2792
3256	96	20.886	1.26311
3256	98	20.839	1.25175
3256	100	19.799	1.21901
3256	102	19.569	1.18103
3256	104	21.088	1.21943
3256	106	19.659	1.22216
3256	108	19.735	1.18182
3256	110	17.828	1.12641
3256	112	19.319	1.11411
3256	114	18.92	1.14715
3256	116	18.723	1.12928
3256	118	18.399	1.11365
3256	120	17.987	1.09156
3256	122	17.949	1.07808
3256	124	17.76	1.07126
3256	126	17.795	1.06665
3256	128	18.225	1.08057
3256	130	17.379	1.06802
3256	132	17.088	1.034
3256	136	15.969	1.98304
3256	138	16.433	0.972027
3256	140	15.331	0.952729
3256	146	15.122	2.74075
3256	148	15.32	0.913254
3256	150	14.613	0.897906
3256	152	20.592	1.05104
3256	154	12.486	0.982254
3256	158	11.474	1.43717
3256	160	10.509	0.659278
3256	186	0	2.73234
3254	8	0	0
3254	10	21.161	0.42322
3254	15	21.944	3.2327
3254	16	21.946	0.65835
3254	18	23.902	1.37502
3254	20	25.142	1.47116
3254	22	25.754	1.52684
3254	24	26.912	1.57985
3254	26	27.645	1.63666
3254	28	27.658	1.65909
3254	30	27.902	1.66679
3254	32	27.694	1.66788
3254	34	29.085	1.7032
3254	36	28.367	1.72352
3254	38	30.93	1.77836
3254	40	30.97	1.857
3254	42	30.751	1.85163
3254	44	31.696	1.87334
3254	46	32.083	1.91336
3254	48	31.172	1.89758
3254	50	32.019	1.89567
3254	52	30.254	1.86794
3254	54	32.691	1.88788
3254	56	32.912	1.96809
3254	58	30.586	1.90451
3254	60	32.322	1.887
3254	62	32.607	1.94786
3254	64	32.43	1.95111
3254	66	31.583	1.92033
3254	68	29.347	1.82749
3254	70	33.808	1.89307
3254	72	32.333	1.98407
3254	74	32.272	1.93815
3254	76	32.288	1.9368
3254	78	33.026	1.95938
3254	80	33.547	1.99717
3254	82	34.269	2.03444
3254	84	32.313	1.99717
3254	86	31.743	1.92165
3254	88	32.164	1.9172
3254	90	30.725	1.88651
3254	92	29.449	1.80508
3254	94	32.606	1.86085
3254	96	31.03	1.90888
3254	98	30.895	1.85775
3254	100	31.396	1.86871
3254	102	30.913	1.86925
3254	104	29.77	1.82038
3254	106	28.301	1.74194
3254	108	26.788	1.65246
3254	110	28.563	1.66025
3254	112	27.361	1.67759
3254	114	26.807	1.62501
3254	116	25.6	1.57207
3254	118	26.348	1.55839
3254	120	25.095	1.54314
3254	122	24.075	1.47499
3254	124	24.186	1.44783
3254	126	23.793	1.43935
3254	128	22.07	1.37557
3254	130	20.068	1.26366
3254	132	19.964	1.20096
3254	134	19.58	1.1863
3254	136	17.888	1.12366
3254	138	15.007	0.985586
3254	140	14.488	0.884804
3254	142	14.689	0.875303
3254	144	12.502	0.814849
3254	146	11.049	0.706081
3254	148	9.561	0.617762
3254	150	8.816	0.551159
3254	152	5.707	0.432323
3254	164	0	0.68484
3253	8	0	0
3253	10	20.134	0.40268
3253	12	21.233	1.24086
3253	14	21.95	1.29543
3253	16	20.456	1.27192
3253	18	22.677	1.29342
3253	20	22.272	1.34845
3253	22	21.861	1.32397
3253	24	21.701	1.30686
3253	26	24.823	1.39467
3253	28	23.61	1.45284
3253	30	23.34	1.40849
3253	32	24.334	1.43012
3253	34	23.054	1.42147
3253	36	24.083	1.414
3253	38	25.448	1.48574
3253	40	26.867	1.56926
3253	42	27.268	1.62404
3253	44	28.803	1.68192
3253	46	27.146	1.67822
3253	48	27.01	1.62468
3253	50	26.589	1.60795
3253	52	27.112	1.611
3253	54	27.694	1.64415
3253	56	27.679	1.66119
3253	58	28.036	1.67144
3253	60	28.556	1.69774
3253	62	27.805	1.69078
3253	64	27.403	1.65623
3253	66	29.135	1.69587
3253	68	29.338	1.75419
3253	70	28.14	1.72422
3253	72	28.435	1.69724
3253	74	30.754	1.77522
3253	76	28.806	1.78648
3253	78	28.993	1.73397
3253	80	27.607	1.69783
3253	82	27.499	1.65318
3253	84	29.65	1.71407
3253	86	27.918	1.72678
3253	88	28.78	1.70087
3253	90	29.452	1.74692
3253	92	29.367	1.76457
3253	94	28.894	1.74781
3253	96	29.59	1.75448
3253	98	26.865	1.69299
3253	100	26.868	1.61199
3253	102	26.9	1.61304
3253	104	25.474	1.57103
3253	106	27.244	1.58124
3253	108	26.294	1.60606
3253	110	25.456	1.55243
3253	112	23.958	1.48219
3253	114	25.438	1.48166
3253	116	26.257	1.55079
3253	118	26.579	1.58507
3253	120	24.779	1.54042
3253	122	25.663	1.51318
3253	124	24.322	1.49937
3253	126	25.435	1.49259
3253	128	23.977	1.48214
3253	130	23.409	1.42155
3253	132	23.417	1.40478
3253	134	22.578	1.37977
3253	136	21.295	1.316
3253	138	21.573	1.28603
3253	140	21.445	1.29054
3253	142	19.682	1.23343
3253	144	20.223	1.19711
3253	146	19.855	1.20232
3253	148	18.782	1.15896
3253	150	18.811	1.12779
3253	152	17.586	1.0917
3253	154	17.103	1.04064
3253	156	17.214	1.02951
3253	158	15.113	0.969127
3253	160	14.666	0.893336
3253	162	12.805	0.823499
3253	164	12.151	0.748594
3253	166	11.8	0.718504
3253	168	10.988	0.683495
3253	170	11.145	0.663984
3253	172	9.929	0.631869
3253	174	8.768	0.560549
3253	194	0	1.7536
3251	12	0	0
3251	14	20.82	0.4164
3251	16	22.75	1.30667
3251	18	26.342	1.47144
3251	20	26.603	1.58834
3251	22	26.155	1.58272
3251	24	27.204	1.60067
3251	26	27.344	1.63644
3251	28	26.84	1.6255
3251	30	26.805	1.60935
3251	32	27.112	1.6175
3251	34	28.394	1.66503
3251	36	29.761	1.74449
3251	38	29.404	1.77494
3251	40	30.324	1.79177
3251	42	29.359	1.79041
3251	44	30.527	1.79647
3251	46	28.984	1.78513
3251	48	28.772	1.73268
3251	50	30.546	1.77927
3251	52	31.647	1.86569
3251	54	32.335	1.91942
3251	56	31.622	1.91867
3251	58	31.759	1.90143
3251	60	31.061	1.88456
3251	62	32.287	1.90032
3251	64	31.729	1.92046
3251	66	32.54	1.92802
3251	68	31.602	1.92419
3251	70	31.356	1.88874
3251	72	32.364	1.91152
3251	74	31.481	1.91529
3251	76	30.575	1.86161
3251	78	31.027	1.84804
3251	80	30.127	1.83455
3251	82	30.53	1.8197
3251	84	30.69	1.8366
3251	86	30.327	1.8305
3251	88	29.263	1.78761
3251	90	29.422	1.76055
3251	92	29.711	1.77398
3251	94	28.395	1.74303
3251	96	27.96	1.69063
3251	98	25.563	1.60515
3251	100	27.678	1.59681
3251	102	26.032	1.61105
3251	104	26.609	1.5792
3251	106	27.909	1.63538
3251	108	27.268	1.65527
3251	110	26.314	1.60738
3251	112	26.053	1.571
3251	114	27.96	1.62005
3251	116	26.206	1.6247
3251	118	25.502	1.55119
3251	120	24.251	1.49243
3251	122	23.206	1.42359
3251	124	22.76	1.37896
3251	126	21.046	1.31384
3251	128	21.212	1.26774
3251	130	21.491	1.28108
3251	132	21.281	1.28315
3251	134	20.101	1.24129
3251	136	19.21	1.17923
3251	138	19.11	1.1496
3251	140	17.7	1.10403
3251	142	15.796	1.00434
3251	144	16.676	0.974041
3251	146	16.467	0.994283
3251	148	14.313	0.922645
3251	150	11.743	0.780409
3251	152	13.431	0.754653
3251	154	11.674	0.752534
3251	156	10.859	0.675843
3251	158	9.42	0.607859
3251	160	8.745	0.544825
3251	162	8.531	0.518267
3251	164	6.777	0.458232
3251	166	5.854	0.378592
3251	168	3.173	0.266737
3251	170	4.374	0.225448
3251	173	0	0.13122
3249	8	0	0
3249	10	22.744	0.45488
3249	12	22.11	1.34558
3249	14	22.828	1.34808
3249	16	22.867	1.37085
3249	20	23.224	2.76543
3249	22	23.682	1.40716
3249	24	24.01	1.43075
3249	26	24.44	1.45348
3249	28	25.5	1.49809
3249	34	26.552	4.68436
3249	36	26.324	1.58628
3249	38	27.244	1.60696
3249	40	26.422	1.60992
3249	42	26.779	1.59602
3249	44	27.41	1.62563
3249	46	25.902	1.59915
3249	48	26.456	1.57071
3249	50	28.008	1.6337
3249	52	27.881	1.67667
3249	54	28.969	1.7054
3249	56	27.595	1.69675
3249	58	28.459	1.68155
3249	60	27.461	1.67751
3249	62	28.409	1.67602
3249	64	27.772	1.68539
3249	66	28.324	1.68285
3249	68	28.85	1.7152
3249	70	28.904	1.73262
3249	72	28.049	1.70853
3249	74	27.248	1.65885
3249	76	27.821	1.65204
3249	78	28.288	1.68325
3249	80	26.752	1.65099
3249	82	26.641	1.60179
3249	84	28.345	1.64932
3249	86	25.231	1.60637
3249	88	25.31	1.51623
3249	90	27.61	1.5871
3249	92	27.163	1.64317
3249	94	26.576	1.61214
3249	96	27.619	1.62575
3249	98	26.853	1.63411
3249	100	26.497	1.60049
3249	104	23.544	3.00072
3249	106	22.427	1.37899
3249	108	21.623	1.32143
3249	110	23.47	1.35241
3249	112	22.83	1.38896
3249	102	25.378	-7.22783
3249	116	23.058	10.1677
3249	118	21.441	1.33468
3249	120	21.711	1.29455
3249	122	20.531	1.2671
3249	124	21.061	1.24773
3249	126	20.781	1.25525
3249	130	17.904	2.31896
3249	132	17.355	1.05773
3249	134	16.348	1.01094
3249	136	16.069	0.972498
3249	138	16.394	0.973874
3249	140	15.093	0.944341
3249	142	14.648	0.892197
3249	144	14.562	0.876299
3249	146	12.21	0.802125
3249	150	11.345	1.41298
3249	152	11.41	0.682649
3249	165	0	1.4833
3248	8	0	0
3248	10	29.251	0.58502
3248	12	27.682	1.70777
3248	14	29.163	1.70516
3248	16	30.42	1.78736
3248	18	31.619	1.86105
3248	20	31.873	1.90475
3248	22	31.21	1.89246
3248	24	30.791	1.86002
3248	26	28.828	1.78825
3248	28	30.547	1.781
3248	30	32.606	1.89425
3248	32	30.583	1.89535
3248	34	32.549	1.89365
3248	36	33.328	1.97626
3248	38	31.803	1.95375
3248	40	30.512	1.86932
3248	42	32.96	1.90369
3248	44	30.199	1.89417
3248	46	30.514	1.82138
3248	48	30.961	1.84423
3248	50	30.753	1.85142
3248	52	31.075	1.85483
3248	54	30.487	1.84683
3248	56	29.724	1.80628
3248	58	30.647	1.81106
3248	60	30.853	1.845
3248	62	28.746	1.7876
3248	64	29.109	1.73564
3248	66	27.635	1.70213
3248	68	28.168	1.67406
3248	70	29.807	1.73902
3248	72	29.732	1.78617
3248	74	30.235	1.79899
3248	76	29.19	1.78266
3248	78	28.739	1.73785
3248	80	27.035	1.67296
3248	82	28.914	1.67815
3248	84	26.919	1.67463
3248	86	28.347	1.6578
3248	88	25.718	1.62131
3248	90	26.643	1.57075
3248	92	26.166	1.58425
3248	94	25.522	1.5506
3248	96	24.684	1.50611
3248	98	24.367	1.47152
3248	100	24.074	1.45322
3248	102	23.35	1.42266
3248	104	23.587	1.4081
3248	106	22.496	1.38236
3248	108	23.916	1.39214
3248	112	21.684	2.73491
3248	114	22.507	1.32565
3248	116	20.773	1.29805
3248	118	20.023	1.22381
3248	120	17.141	1.1138
3248	122	14.726	0.955094
3248	124	12.494	0.815683
3248	126	14.345	0.804531
3248	128	12.313	0.798964
3248	130	12.27	0.73749
3248	132	12.054	0.72971
3248	136	8.684	1.23877
3248	138	15.397	0.712884
3248	140	8.752	0.715148
3248	142	7.343	0.482232
3248	161	0	1.39517
3246	8	0	0
3246	10	23.71	0.4742
3246	12	21.586	1.35838
3246	14	24.968	1.39539
3246	16	19.922	1.34385
3246	18	23.502	1.30124
3246	20	23.432	1.40802
3246	22	28.261	1.54853
3246	24	28.772	1.71097
3246	26	26.329	1.65249
3246	28	28.12	1.63318
3246	30	29.299	1.72245
3246	32	30.951	1.80727
3246	34	31.669	1.87856
3246	36	29.746	1.84215
3246	38	29.46	1.77617
3246	40	30.171	1.78889
3246	42	30.719	1.82668
3246	44	29.207	1.79759
3246	46	28.878	1.74254
3246	48	30.343	1.77645
3246	50	30.087	1.81289
3246	52	28.876	1.76877
3246	54	30.339	1.77627
3246	56	29.544	1.79644
3246	58	29.44	1.76952
3246	60	30.262	1.791
3246	62	31.194	1.84361
3246	64	29.843	1.83096
3246	66	29.229	1.77213
3246	68	28.401	1.72884
3246	70	29.909	1.7491
3246	72	28.882	1.76364
3246	74	30.14	1.77053
3246	76	29.041	1.77533
3246	78	28.994	1.74105
3246	80	28.062	1.7116
3246	82	28.473	1.69604
3246	84	27.972	1.69333
3246	86	27.306	1.6583
3246	88	28.227	1.66591
3246	90	27.501	1.67179
3246	92	28.199	1.67096
3246	94	28.58	1.70336
3246	96	28.303	1.70648
3246	98	29.127	1.72284
3246	100	27.937	1.7118
3246	102	28.493	1.69287
3246	104	25.995	1.63407
3246	106	25.414	1.54224
3246	108	26.484	1.55683
3246	110	25.246	1.55175
3246	112	25.26	1.51518
3246	114	25.559	1.52456
3246	116	25.3	1.52576
3246	118	26.062	1.5408
3246	120	24.786	1.52528
3246	122	25.093	1.49636
3246	124	25.667	1.52277
3246	126	23.395	1.47133
3246	128	23.946	1.4202
3246	130	23.867	1.43439
3246	132	24.378	1.44732
3246	134	23.272	1.42937
3246	136	22.852	1.3837
3246	138	22.99	1.37526
3246	140	21.99	1.34929
3246	142	22.264	1.32761
3246	144	22.569	1.34498
3246	146	21.58	1.32436
3246	148	20.391	1.25896
3246	150	19.976	1.21099
3246	152	20.219	1.20584
3246	154	20.178	1.21191
3246	156	19.182	1.18067
3246	158	19.345	1.15581
3246	160	18.969	1.1494
3246	162	18.192	1.11475
3246	164	17.765	1.07868
3246	166	16.325	1.0224
3246	168	15.79	0.963405
3246	170	14.645	0.912835
3246	172	14.125	0.863053
3246	174	13.416	0.826139
3246	176	13.227	0.799283
3246	178	11.385	0.73767
3246	206	0	3.1878
3246	10	0	0
3244	12	22.238	0.44476
3244	14	25.942	1.44397
3244	16	24.859	1.52391
3244	18	26.378	1.53688
3244	20	24.258	1.51864
3244	22	25.693	1.49832
3244	24	25.478	1.53513
3244	26	29.41	1.64523
3244	28	29.246	1.75968
3244	30	29.167	1.75239
3244	32	31.297	1.81354
3244	34	30.665	1.85883
3244	36	30.826	1.84473
3244	38	31.358	1.8655
3244	40	33.173	1.93567
3244	42	33.133	1.98918
3244	44	33.389	1.99566
3244	46	32.299	1.97055
3244	48	33.379	1.97025
3244	50	34.413	2.03368
3244	52	33.906	2.04955
3244	54	31.198	1.95256
3244	56	32.812	1.9201
3244	58	34.138	2.00837
3244	60	33.389	2.02577
3244	62	33.842	2.01691
3244	64	33.798	2.0292
3244	66	32.505	1.98896
3244	68	33.425	1.97784
3244	70	32.184	1.96815
3244	72	31.793	1.9193
3244	74	29.877	1.8498
3244	76	31.936	1.85405
3244	78	27.638	1.78567
3244	80	32.55	1.80363
3244	82	32.701	1.95753
3244	84	31.608	1.92918
3244	86	32.152	1.91278
3244	88	30.727	1.88621
3244	90	31.481	1.86619
3244	92	31.27	1.88253
3244	94	31.029	1.86897
3244	96	31.007	1.86108
3244	98	31.185	1.86576
3244	100	29.648	1.8248
3244	102	29.955	1.78808
3244	104	29.633	1.78763
3244	106	27.848	1.72415
3244	108	29.765	1.72807
3244	110	28.887	1.75949
3244	112	27.781	1.69993
3244	114	27.454	1.65704
3244	116	27.383	1.64511
3244	118	27.186	1.63707
3244	120	26.708	1.6168
3244	122	26.382	1.59269
3244	124	26.564	1.58838
3244	126	25.769	1.56993
3244	128	24.952	1.52156
3244	130	24.673	1.48874
3244	132	21.22	1.37549
3244	134	25.059	1.38677
3244	136	22.554	1.42773
3244	138	22.884	1.36313
3244	140	22.511	1.36183
3244	142	23.62	1.3838
3244	144	22.098	1.37129
3244	146	21.729	1.31479
3244	148	20.295	1.26048
3244	150	20.568	1.22588
3244	152	18.975	1.18597
3244	154	19.251	1.14677
3244	156	17.691	1.10793
3244	158	14.569	0.966286
3244	160	14.181	0.862474
3244	162	14.953	0.873918
3244	164	13.164	0.84294
3244	166	12.262	0.76262
3244	168	12.254	0.73548
3244	170	10.26	0.674535
3244	172	10.059	0.60956
3244	174	8.304	0.550049
3244	176	7.556	0.475624
3244	178	7.226	0.443423
3244	196	0	1.30068
3242	12	0	0
3242	14	16.668	0.33336
3242	16	16.661	0.99987
3242	18	21.03	1.12819
3242	20	21.987	1.2904
3242	22	22.014	1.32003
3242	24	23.09	1.35299
3242	26	23.367	1.3937
3242	28	24.078	1.4233
3242	30	25.777	1.49536
3242	32	26.24	1.56049
3242	34	25.319	1.54669
3242	36	27.043	1.57058
3242	38	27.691	1.64198
3242	40	28.006	1.6709
3242	42	27.489	1.66483
3242	44	25.319	1.58379
3242	46	29.097	1.63117
3242	48	29.481	1.75733
3242	50	28.433	1.73733
3242	52	29.736	1.74492
3242	54	30.468	1.80608
3242	56	30.31	1.82334
3242	58	28.488	1.76366
3242	60	29.477	1.73887
3242	62	29.993	1.78408
3242	64	29.677	1.79009
3242	66	28.293	1.73893
3242	68	29.561	1.73548
3242	70	29.517	1.77234
3242	72	29.797	1.77941
3242	74	29.326	1.77367
3242	76	29.079	1.75214
3242	78	28.377	1.72364
3242	80	29.654	1.74079
3242	82	27.748	1.72174
3242	84	28.483	1.68688
3242	86	30.371	1.76532
3242	88	29.087	1.7836
3242	90	29.553	1.75918
3242	92	28.791	1.75027
3242	94	28.379	1.71509
3242	96	28.185	1.69692
3242	98	28.455	1.69919
3242	100	28.2	1.69964
3242	102	28.687	1.70659
3242	104	27.642	1.68977
3242	106	26.668	1.62921
3242	108	24.883	1.54622
3242	110	25.3	1.50547
3242	112	25.786	1.53256
3242	114	26.625	1.57226
3242	116	26.583	1.59624
3242	118	25.657	1.56712
3242	120	26.11	1.55299
3242	122	22.949	1.47075
3242	124	24.466	1.42221
3242	126	24.303	1.46307
3242	128	24.757	1.47178
3242	130	23.467	1.44655
3242	132	23.097	1.39691
3242	134	24.883	1.43907
3242	136	23.731	1.45828
3242	138	22.541	1.38801
3242	140	21.565	1.32307
3242	142	20.757	1.26958
3242	144	21.429	1.26553
3242	146	20.47	1.25686
3242	148	19.278	1.19226
3242	150	19.592	1.16609
3242	152	18.759	1.15044
3242	154	16.112	1.04512
3242	183	0	4.67248
3241	8	0	0
3241	10	22.246	0.44492
3241	12	22.05	1.32888
3241	24	19.98	7.56234
3241	26	17.85	1.1343
3241	28	25.969	1.30698
3241	30	24.11	1.50202
3241	32	25.893	1.49977
3241	34	27.287	1.59522
3241	36	25.992	1.59821
3241	40	24.281	3.0158
3241	42	24.945	1.47674
3241	44	24.979	1.49772
3241	46	26.07	1.53135
3241	48	26.916	1.58951
3241	50	27.618	1.63597
3241	52	26.281	1.6168
3241	54	25.451	1.55189
3241	56	28.757	1.62523
3241	58	28.327	1.7125
3241	60	27.916	1.68727
3241	62	30.043	1.73838
3241	64	25.809	1.67395
3241	66	28.781	1.63689
3241	68	27.455	1.68692
3241	70	27.786	1.65722
3241	72	28.639	1.69269
3241	74	30.418	1.77144
3241	76	29.252	1.78999
3241	78	29.008	1.74779
3241	80	29.957	1.76887
3241	82	30.165	1.80366
3241	84	31.239	1.84203
3241	86	32.024	1.89784
3241	88	29.099	1.83299
3241	90	30.667	1.79277
3241	92	29.983	1.81946
3241	94	33.487	1.90313
3241	96	31.657	1.95406
3241	98	32.608	1.92788
3241	100	32.242	1.94549
3241	102	31.463	1.9111
3241	104	31.334	1.88391
3241	106	32.629	1.91876
3241	110	31.103	3.82355
3241	112	32.372	1.90412
3241	114	30.468	1.88491
3241	116	29.352	1.7945
3241	118	32.725	1.86139
3241	120	29.512	1.86628
3241	122	30.412	1.79765
3241	124	31.146	1.8467
3241	126	30.376	1.84561
3241	128	27.837	1.74584
3241	130	28.169	1.68017
3241	132	29.188	1.72062
3241	134	27.818	1.71002
3241	136	25.821	1.6088
3241	138	27.302	1.59348
3241	140	24.301	1.54722
3241	142	24.08	1.45142
3241	144	25.7	1.49314
3241	146	26.712	1.57226
3241	148	24.72	1.54257
3241	150	24.616	1.48008
3241	152	23.053	1.42981
3241	154	23.486	1.39615
3241	156	22.206	1.37058
3241	158	22.466	1.34015
3241	160	21.114	1.30719
3241	162	22.012	1.29369
3241	164	19.816	1.25426
3241	166	18.906	1.16155
3241	168	19.917	1.16456
3241	170	18.126	1.14087
3241	172	17.785	1.07731
3241	174	18.273	1.08171
3241	176	17.591	1.07586
3241	178	14.712	0.967804
3241	180	14.05	0.862784
3241	182	15.179	0.876652
3241	184	11.719	0.804705
3241	186	11.795	0.705419
3241	188	9.766	0.645873
3241	199	0	1.07426
3238	8	0	0
3238	10	20.886	0.41772
3238	12	20.898	1.25352
3238	14	23.179	1.32172
3238	16	23.626	1.40413
3238	18	25.423	1.47114
3238	20	23.79	1.47612
3238	22	26.229	1.49997
3238	24	26.086	1.56945
3238	26	26.007	1.56279
3238	28	27.322	1.59971
3238	30	28.383	1.67105
3238	32	28.239	1.69866
3238	34	28.884	1.71365
3238	36	28.993	1.73631
3238	38	30.979	1.79883
3238	40	31.013	1.85976
3238	42	31.841	1.88557
3238	44	31.109	1.88846
3238	46	33.045	1.92433
3238	48	31.2	1.92709
3238	50	32.315	1.90535
3238	52	32.817	1.95394
3238	54	31.675	1.93466
3238	56	32.665	1.93012
3238	58	32.757	1.96266
3238	60	31.369	1.92363
3238	62	29.945	1.83925
3238	64	32.379	1.86924
3238	66	31.495	1.91616
3238	68	30.47	1.85887
3238	70	31.828	1.86879
3238	72	32.49	1.92951
3238	74	30.462	1.88823
3238	76	30.25	1.82136
3238	78	31.274	1.84563
3238	80	31.34	1.87842
3238	82	30.79	1.86388
3238	84	29.478	1.8079
3238	86	30.398	1.79621
3238	88	28.479	1.766
3238	90	28.655	1.71402
3238	92	27.781	1.69301
3238	94	29.904	1.73016
3238	96	29.979	1.79649
3238	98	28.169	1.74416
3238	100	28.586	1.70263
3238	102	27.93	1.69544
3238	104	28.531	1.6938
3238	106	28.332	1.70589
3238	108	29.341	1.7301
3238	110	27.607	1.70818
3238	112	26.797	1.63206
3238	114	26.12	1.58747
3238	116	27.617	1.6119
3238	118	27.375	1.64975
3238	120	27.264	1.63917
3238	122	25.77	1.59081
3238	124	25.987	1.55271
3238	126	24.943	1.52779
3238	128	23.037	1.43902
3238	130	24.549	1.42734
3238	132	23.584	1.44389
3238	134	24.081	1.42992
3238	136	23.939	1.4406
3238	138	22.923	1.40575
3238	140	23.185	1.38323
3238	142	21.473	1.33941
3238	144	21.284	1.28271
3238	146	21.05	1.27001
3238	148	20.336	1.24152
3238	150	19.482	1.19445
3238	152	18.76	1.14719
3238	154	17.588	1.09025
3238	156	17.182	1.04308
3238	158	16.884	1.02197
3238	160	15.111	0.959358
3238	162	14.556	0.889958
3238	164	13.714	0.847975
3238	187	0	3.15422
3237	0	0	0
3237	10	30.874	3.0874
3237	12	29.038	1.79708
3237	14	33.581	1.87692
3237	16	32.329	1.97718
3237	18	29.508	1.85447
3237	20	33.062	1.87609
3237	22	30.31	1.90056
3237	24	31.41	1.8515
3237	26	32.603	1.92028
3237	29	32.943	2.94956
3237	30	32.981	0.98886
3237	32	33.472	1.99357
3237	34	34.03	2.02504
3237	36	33.267	2.01887
3237	38	31.88	1.95426
3237	40	33.481	1.96063
3237	42	34.71	2.04562
3237	44	31.394	1.98229
3237	46	32.626	1.92048
3237	48	37.651	2.10651
3237	50	36.98	2.2389
3237	52	36.14	2.19355
3237	54	37.369	2.20517
3237	58	35.18	4.35228
3237	60	36.194	2.14115
3237	62	34.387	2.1172
3237	64	35.526	2.0973
3237	66	37.339	2.18572
3237	68	34.378	2.1509
3237	70	35.244	2.08861
3237	72	36.017	2.13779
3237	74	34.023	2.10092
3237	76	33.28	2.01905
3237	78	32.873	1.98458
3237	80	35.893	2.06232
3237	82	34.227	2.1034
3237	84	30.971	1.95513
3237	86	31.761	1.88191
3237	88	29.912	1.84991
3237	90	31.677	1.84742
3237	92	28.886	1.81625
3237	94	32.15	1.83021
3237	96	32.346	1.93488
3237	98	32.781	1.9538
3237	100	31.961	1.94221
3237	102	28.779	1.82137
3237	104	29.648	1.75275
3237	106	30.191	1.79515
3237	108	29.952	1.80429
3237	110	29.035	1.76954
3237	112	28.947	1.73946
3237	114	27.902	1.70537
3237	116	28.072	1.67922
3237	118	28.485	1.69669
3237	120	27.313	1.67382
3237	122	26.771	1.62249
3237	124	26.705	1.60428
3237	126	24.165	1.52547
3237	128	24.433	1.45793
3237	130	24.444	1.46631
3237	132	23.273	1.43137
3237	134	22.992	1.38794
3237	136	21.595	1.33739
3237	138	20.618	1.26628
3237	140	17.382	1.13862
3237	142	17.802	1.05549
3237	144	16.924	1.04167
3237	146	16.453	1.00128
3237	148	14.261	0.920637
3237	150	14.021	0.84845
3237	172	0	3.08462
3236	0	0	0
3236	10	15.971	1.5971
3236	12	17.91	1.01587
3236	14	17.872	1.07346
3236	16	19.668	1.12577
3236	18	22.633	1.26799
3236	20	23.989	1.39846
3236	22	24.65	1.45913
3236	24	23.647	1.44881
3236	26	23.674	1.41963
3236	28	23.518	1.41576
3236	30	21.879	1.36161
3236	32	24.927	1.40319
3236	34	22.85	1.43286
3236	36	23.287	1.38409
3236	38	18.716	1.2576
3236	40	21.523	1.20619
3236	42	27.315	1.46169
3236	44	21.855	1.47206
3236	46	19.756	1.2478
3236	48	22.379	1.26323
3236	50	23.599	1.37918
3236	52	26.42	1.49977
3236	54	23.596	1.49968
3236	56	25.302	1.46664
3236	58	23.603	1.46685
3236	60	25.902	1.48462
3236	62	27.026	1.58772
3236	64	27.183	1.62627
3236	66	26.177	1.60071
3236	68	27.247	1.60261
3236	70	25.789	1.59088
3236	72	28.041	1.61443
3236	74	27.937	1.67934
3236	76	29.542	1.72415
3236	78	29.823	1.78094
3236	80	31.585	1.84199
3236	82	28.064	1.78843
3236	84	27.525	1.66764
3236	86	30.256	1.73278
3236	88	29.999	1.80764
3236	90	30.173	1.80516
3236	92	29.542	1.79142
3236	94	29.42	1.76886
3236	96	30.602	1.80054
3236	98	32.112	1.88124
3236	100	30.783	1.88671
3236	102	30.846	1.84887
3236	104	28.85	1.79055
3236	106	31.671	1.81497
3236	108	29.058	1.82131
3236	110	28.703	1.73282
3236	112	30.723	1.78244
3236	114	31.236	1.85875
3236	116	29.765	1.82985
3236	118	30.427	1.80572
3236	120	27.519	1.73765
3236	122	28.057	1.66725
3236	124	28.077	1.68402
3236	126	27.375	1.66352
3236	128	27.707	1.65245
3236	130	28.201	1.67722
3236	132	28.142	1.69029
3236	134	26.938	1.65227
3236	136	26.384	1.59963
3236	138	26.685	1.59206
3236	140	26.33	1.59044
3236	142	27.796	1.62358
3236	144	25.138	1.58735
3236	146	25.661	1.52394
3236	148	26.039	1.55099
3236	150	25.2	1.5371
3236	152	26.777	1.55907
3236	154	25.657	1.5729
3236	156	24.662	1.50947
3236	158	23.969	1.45888
3236	160	24.378	1.45039
3236	162	22.571	1.40812
3236	164	24.951	1.42506
3236	166	24.851	1.49406
3236	168	22.136	1.40882
3236	170	18.304	1.21138
3236	172	21.719	1.19923
3236	174	22.594	1.3293
3236	176	20.248	1.28462
3236	178	20.582	1.22489
3236	180	19.082	1.18964
3236	182	18.707	1.13365
3236	184	19.351	1.14169
3236	186	18.546	1.13682
3236	188	15.874	1.03156
3236	228	0	6.3496
3263	0	0
3263	12	20.1	2.412
3263	14	21.833	1.25763
3263	16	23.338	1.35488
3263	18	23.176	1.39542
3263	20	21.208	1.33108
3263	22	25.372	1.39554
3263	24	27.022	1.57156
3263	26	26.169	1.59566
3263	28	24.247	1.51211
3263	30	24.893	1.47416
3263	32	24.974	1.49601
3263	34	27.216	1.56522
3263	36	27.325	1.63623
3263	38	29.121	1.69309
3263	40	27.397	1.69528
3263	42	27.521	1.64754
3263	44	26.496	1.62041
3263	46	29.078	1.66662
3263	48	29.396	1.75421
3263	50	28.543	1.73811
3263	52	29.512	1.74157
3263	54	29.787	1.77896
3263	58	31.857	7.39589
3263	60	31.365	1.89664
3263	62	31.433	1.88394
3263	64	29.726	1.83453
3263	66	29.989	1.79144
3263	68	32.153	1.86388
3263	70	34.521	1.9998
3263	72	33.862	2.05146
3263	74	31.568	1.9625
3263	76	32.719	1.92851
3263	78	34.677	2.0216
3263	82	32.827	8.09947
3263	84	34.564	2.02151
3263	86	38.202	2.18207
3263	88	36.499	2.24084
3263	90	38.003	2.23491
3263	94	33.431	8.56622
3263	96	33.479	2.0073
3263	98	35.258	2.06188
3263	100	33.909	2.07488
3263	102	34.42	2.04985
3263	104	34.258	2.06034
3263	106	32.84	2.01279
3263	108	28.705	1.84496
3263	110	31.519	1.80606
3263	112	33.028	1.93623
3263	114	30.22	1.89682
3263	116	28.957	1.77518
3263	118	30.573	1.78568
3263	120	28.009	1.7569
3263	122	25.922	1.61753
3263	126	24.938	6.10282
3263	128	24.554	1.48475
3263	130	23.673	1.44673
3263	132	24.895	1.45689
3263	134	23.312	1.44595
3263	136	22.885	1.38589
3263	138	22.281	1.35494
3263	140	21.275	1.30656
3263	142	22.326	1.3079
3263	144	22.426	1.34256
3263	146	18.934	1.23932
3263	148	18.848	1.13346
3263	150	18.352	1.11597
3263	152	16.861	1.05607
3263	154	16.104	0.988863
3263	156	13.361	0.88267
3263	158	12.255	0.768241
3263	160	12.604	0.745746
3263	162	12.193	0.743876
3263	164	11.234	0.702614
3263	188	0	2.69616

## Sheet: Group 1 Father Son compare
Baby	Dad	%Similarity	Accuracy	%Sequential	Pitch diff	FM diff	Entropy diff	Goodness diff	AM diff	Treatment	Cage	Position	brothers
3236	3363	87.6	77.752	82.086	1.2798	1.7108	3.0036	2.58	2.1096	N	C9T	T	2
3237	3216	48.7778	72.0589	73.9644	1.03956	1.01689	3.75289	3.57833	0.488	N	C10T	T	1
3238	2265	44.6	64.608	100	1.9596	0.79	2.423	0.9934	0.7812	S	C4B	B	0
3241	3041	66.8333	74.7283	100	1.93	1.14233	3.254	2.90533	0.7455	S	C3M	M	2
3242	3041	34.2	83.554	100	1.6102	1.174	2.2236	2.5204	0.8242	S	C3M	M	2
3244	3216	84.5	65.0512	91.8287	0.819875	0.980375	2.56288	1.91325	0.560625	N	C10T	T	1
3246	3041	71	73.946	100	1.4002	1.3468	2.0674	2.6058	0.8094	S	C3M	M	2
3248	3363	31.4	74.462	85.778	1.1166	2.108	3.6634	5.0682	1.8124	N	C5T	T	2
3249	3363	85	78.77	58.788	1.0076	1.8306	2.4976	4.3072	2.0934	N	C5T	T	2
3251	2329	52.8	71.88	51.722	1.0872	1.968	3.7286	3.96	1.5368	S	C6B	B	0
3253	2020	40.6	73.578	73.958	0.7914	2.2948	2.866	3.7414	1.617	N	C10B	B	1
3254	2020	71	78.296	87.53	0.8032	2.6026	2.906	3.572	1.661	N	C10B	B	1
3256	2029	70.2	74.024	79.52	2.4334	1.6962	2.8178	2.8642	1.5508	N	C9T	T	0
3261	3360	82.6	66.78	28.958	1.0576	1.6564	2.5276	2.1104	1.555	S	C4U	M	0
3262	3227	61.8	70.986	95.258	1.9242	1.5852	4.0966	3.6948	1.5012	S	C4L	M	0
3263	3228	37.8	70.202	89.908	2.2736	1.824	4.1398	2.8284	1.9794	N	C5L	M	0
3367	2068	61.2	74.778	100	2.1306	0.7902	2.824	2.836	0.5368	S	C3B	B	1
3368	2068	32.6	73.904	100	2.4814	0.8348	2.7392	2.8122	0.6048	S	C3B	B	1
3375	3219	11.8	31.506	39.4	1.4064	0.8026	3.5328	3.6956	0.6206	N	C9B	B	3
3376	3219	30.125	44.2713	51.0138	1.86862	0.90925	2.884	4.3925	0.637875	N	C9B	B	3
3377	3219	50	83.9825	100	1.825	0.75025	3.796	3.781	0.6055	N	C9B	B	3
3378	3219	8.8	12.356	19.2	1.8742	0.8828	3.6302	3.8382	0.7784	N	C9B	B	3
3380	2276	57.8	75.044	100	1.361	0.886	4.327	3.049	0.5908	S	C6T	T	0
3381	2014	86.8	76.528	100	0.7742	0.7494	2.8414	3.1022	0.6786	S	C6M	M	0

## Sheet: Group 2 all data
Individual	Low freq	High freq	Peak freq		Control	% similarity average	Accuracy Average	% Sequential Average
HG150	792.1	10944.2	4478.9		HG 169 to HG 3580	40.99	76.2448	74.322
1	792.1	10944.2	4478.9		HG 563 to HG 3441	57	80.742	72.2249
2	743.6	10911.8	3962.1		HG 1175 to HG 3465	63.1837	74.7151	77.9087
3	727.5	10184.4	3876		HG 1299 to HG 3458	41.7677	81.4343	73.7802
4	807.4	10825.5	3186.9		HG 2009 to HG 3455	56.3	81.1357	72.5949
5	761.2	10897.1	4651.2		Experimental
6	776	10960.3	4651.2		HG 150 to HG 3375	71.475	75.7555	68.1744
	771.414	10809.6	4183.6		HG 170 to HG 3618	64.08	79.506	79.5831
HG169					HG 180 to HG 3588	64.3058	73.7905	58.1669
1	879.8	10672.5	5857		HG 597 to HG 3607	61.07	77.6851	70.2667
2	783.6	10626.3	3100.8		HG 2139 to HG 3362	70.38	77.4991	73.5986
3	481.1	10937.2	3100.8
4	1548.1	10758.5	3876
5	1168.5	10750.1	3789.8
	972.22	10748.9	3944.88
HG170
1	517.7	10353.4	4823.4
2	531.7	9737.8	4737.3
3	657.6	10339.4	3186.9
4	531.7	10507.3	3186.9
5	489.7	10325.4	4737.3
	545.68	10252.7	4134.36
HG180
1	512	10945	4478.9
2	0	10929	4478.9
3	512	10929	3100.8
4	783	10960	4651.2
5	797	10335.9	4737.3
	520.8	10819.8	4289.42
HG563
1	762	10846.7	3273
2	778.2	10749.4	3876
3	762	10846.7	3876
4	470.2	10781.8	5426.4
5	859.3	10036	3876
	726.34	10652.1	4065.48
HG597
1	867.9	10960.7	3531.4
2	578.6	10767.9	4565
3	578.6	10912.5	5340.2
4	594.6	10414.3	3273
5	594.6	10783.9	3876
	642.86	10767.9	4117.12
HG1175
1	1173.2	10642.2	5684.8
2	1173.2	10848.2	5426.4
3	401.8	10623.2	5598.6
4	883.9	10848.2	4737.3
5	1141.1	10751.8	5426.4
	954.64	10742.7	5374.7
HG1299
1	527.4	10860.2	3359.2
2	510.9	10860.2	3359.2
3	527.4	10942.6	4220.5
4	758.1	10827.2	4134.4
5	840.5	10926.1	4220.5
	632.86	10883.3	3858.76
HG2009
1	552.8	10764	3014.6
2	598.9	10932.9	5254.1
3	583.5	10410.8	5426.4
5	798.5	10698.7	5168
6	783.1	10456.9	3014.6
	663.36	10652.7	4375.54
HG2139
1	761.4	10979.3	3186.9
2	795.3	10942.3	3445.3
3	533	10903.2	4823.4
4	776.6	10857.5	3962.1
5	1096.4	10918.4	3186.9
	792.54	10920.1	3720.92
HG3362
1	761.3	10898.1	3100.8
2	521.6	10306	3186.9
3	761.3	10038.1	3531.4
4	761.3	10728.9	3531.4
5	761.3	10700.7	3617.6
	713.36	10534.4	3393.62
HG3375
1	747.5	10665.6	4823.4
2	531.8	10737.5	4823.4
3	805	10608.1	4737.3
4	776.2	10651.3	4823.4
5	517.5	10910	4823.4
	675.6	10714.5	4806.18
HG3441
1	758.3	10616.7	3100.8
2	772.9	10179.2	3100.8
3	743.8	10760.4	3100.8
4	758.3	10908.3	3100.8
5	787.5	10718.8	3100.8
	764.16	10636.7	3100.8
HG3455
1	617.6	10469.1	5512.5
2	569	10793.4	5512.5
3	741.2	10916.9	5426.4
4	640.2	10870.6	5598.6
5	694.9	10855.1	5512.5
	652.58	10781	5512.5
HG3458
1	765.2	10619	4134.4
2	765.2	10150.5	4134.4
3	749.6	10587.7	4048.2
4	562.2	10874	4134.4
5	577.8	10946.9	4220.5
	684	10635.6	4134.38
HG3465
1	619.4	10575.9	4737.3
2	526.5	10854.7	3617.6
3	511	10653.4	4737.3
4	944.6	10839.2	3617.6
5	557.4	10916.6	3531.4
	631.78	10768	4048.24
HG3580
1	797.4	10335	2497.9
2	567.4	10565	3273
3	812.7	10503.7	2670.1
4	751.4	10917.7	4823.4
5	828	10933	2756.2
	751.38	10650.9	3204.12
HG3588
1	539.4	10914	3186.9
2	777.3	10929.8	3186.9
3	761.4	10929.8	3186.9
4	777.3	10898.1	3186.9
5	761.4	10945.7	3186.9
	723.36	10923.5	3186.9
HG3607
1	542.5	10929.3	3617.6
2	526.5	10817.6	3617.6
3	526.5	10689.9	5340.2
4	558.4	10769.7	4478.9
5	526.5	10482.5	4392.8
	536.08	10737.8	4289.42
HG3618
1	751	10833.3	4651.2
2	767	10929.1	4565
3	751	10929.1	4737.3
4	767	10945.1	4823.4
5	735	10929.1	5426.4
	754.2	10913.1	4840.66
